# Supplementary material for: Theoretical study of the mechanisms of [3+2] cycloaddition reactions of trimetallaallenes [MMM] (M = C, Si, Ge, Sn, and Pb)
Source: Royal Society of Chemistry journal article supplement (doi:10.1039/c0dt00112k), 2010-01-01
Supplement: c0dt00112k.pdf [file c0dt00112k.pdf]

# Supporting Information

## Theoretical Study of the Mechanisms of [3+2] Cycloaddition Reactions of Trimetallaallenes [>M=M=M<] (M = C, Si, Ge, Sn, and Pb)

Jeng-Horng Sheu, Ming-Der Su\*

Department of Applied Chemistry, National Chiayi University, Chiayi 60004,  
Taiwan

midesu@mail.ncyu.edu.tw

(All geometries were calculated B3LYP/LANL2DZ)

## C=C=C-Rea (singlet)

---

| Atomic<br>Number | Coordinates (Angstroms) |           |           |
|------------------|-------------------------|-----------|-----------|
|                  | X                       | Y         | Z         |
| 6                | -1.358841               | 0.000227  | 0.001287  |
| 6                | 0.000263                | -0.003544 | 0.002654  |
| 6                | 1.359059                | -0.001611 | 0.000753  |
| 6                | 2.337038                | -0.927687 | -0.915520 |
| 14               | 2.269202                | -1.095186 | -2.893775 |
| 6                | 2.804377                | 0.458115  | -3.872303 |
| 1                | 2.828079                | 0.156839  | -4.930286 |
| 1                | 2.148187                | 1.324539  | -3.794819 |
| 1                | 3.821857                | 0.772711  | -3.607217 |
| 6                | 3.647727                | -2.303673 | -3.457481 |
| 1                | 3.514428                | -3.342157 | -3.142833 |
| 1                | 3.644337                | -2.294085 | -4.557381 |
| 1                | 4.643224                | -1.973436 | -3.136073 |
| 6                | 0.681258                | -1.734713 | -3.700401 |
| 1                | -0.190099               | -1.129843 | -3.451067 |
| 1                | 0.812358                | -1.687162 | -4.791181 |
| 1                | 0.464962                | -2.774297 | -3.437130 |
| 14               | 2.522636                | -2.781090 | -0.204420 |
| 6                | 2.025032                | -2.963618 | 1.612639  |
| 1                | 2.855057                | -2.691205 | 2.271251  |
| 1                | 1.163758                | -2.349208 | 1.875776  |
| 1                | 1.775665                | -4.013644 | 1.819205  |
| 6                | 1.515563                | -4.095421 | -1.148654 |
| 1                | 1.826774                | -4.226821 | -2.189571 |
| 1                | 1.665824                | -5.057502 | -0.637594 |
| 1                | 0.443392                | -3.884873 | -1.139713 |
| 6                | 4.344618                | -3.360506 | -0.229006 |
| 1                | 4.374202                | -4.382834 | 0.176328  |
| 1                | 4.795842                | -3.387069 | -1.224976 |
| 1                | 4.977133                | -2.738430 | 0.417750  |
| 6                | 3.737896                | -0.234654 | -0.723012 |
| 1                | 3.836363                | 0.639368  | -1.379020 |
| 1                | 4.573013                | -0.902726 | -0.953702 |

|    |           |           |           |
|----|-----------|-----------|-----------|
| 6  | 3.737889  | 0.228688  | 0.724189  |
| 1  | 4.574170  | 0.895097  | 0.955547  |
| 1  | 3.834154  | -0.645589 | 1.380317  |
| 6  | 2.338157  | 0.924160  | 0.916288  |
| 14 | 2.525944  | 2.777564  | 0.204842  |
| 6  | 1.521099  | 4.094007  | 1.148692  |
| 1  | 0.448661  | 3.883245  | 1.144254  |
| 1  | 1.836288  | 4.228796  | 2.187973  |
| 1  | 1.669424  | 5.054563  | 0.634182  |
| 6  | 4.349537  | 3.352786  | 0.230595  |
| 1  | 4.382253  | 4.375423  | -0.173630 |
| 1  | 4.800384  | 3.377013  | 1.226878  |
| 1  | 4.980894  | 2.729626  | -0.416303 |
| 6  | 2.027069  | 2.962442  | -1.611708 |
| 1  | 2.856207  | 2.688659  | -2.270646 |
| 1  | 1.163713  | 2.350454  | -1.875172 |
| 1  | 1.780461  | 4.013375  | -1.817148 |
| 14 | 2.272414  | 1.092055  | 2.894503  |
| 6  | 0.685739  | 1.735040  | 3.700785  |
| 1  | -0.186845 | 1.132537  | 3.450390  |
| 1  | 0.815518  | 1.687054  | 4.791660  |
| 1  | 0.472230  | 2.775208  | 3.437408  |
| 6  | 2.807407  | -0.461881 | 3.872594  |
| 1  | 3.826400  | -0.773767 | 3.610493  |
| 1  | 2.826643  | -0.162115 | 4.931124  |
| 1  | 2.154289  | -1.330001 | 3.791870  |
| 6  | 3.652957  | 2.298158  | 3.458146  |
| 1  | 3.521869  | 3.336826  | 3.143310  |
| 1  | 3.648902  | 2.288827  | 4.558062  |
| 1  | 4.647976  | 1.965844  | 3.137440  |
| 6  | -2.335708 | 0.928953  | -0.914278 |
| 14 | -2.267373 | 1.099509  | -2.892174 |
| 6  | -2.803761 | -0.451824 | -3.873463 |
| 1  | -2.824635 | -0.149429 | -4.931192 |
| 1  | -2.149973 | -1.319862 | -3.795539 |
| 1  | -3.822490 | -0.764530 | -3.610783 |
| 6  | -3.646462 | 2.308530  | -3.454066 |
| 1  | -3.513748 | 3.346727  | -3.138140 |
| 1  | -3.643276 | 2.300282  | -4.553987 |
| 1  | -4.641900 | 1.977439  | -3.133106 |

|    |           |           |           |
|----|-----------|-----------|-----------|
| 6  | -0.678396 | 1.741036  | -3.696286 |
| 1  | -0.463084 | 2.780298  | -3.430814 |
| 1  | 0.193488  | 1.136461  | -3.447231 |
| 1  | -0.808411 | 1.695505  | -4.787267 |
| 14 | -2.520996 | 2.781561  | -0.201138 |
| 6  | -1.513499 | 4.096922  | -1.143886 |
| 1  | -1.827358 | 4.231996  | -2.183578 |
| 1  | -1.661354 | 5.057681  | -0.629638 |
| 1  | -0.441229 | 3.884797  | -1.138227 |
| 6  | -4.343373 | 3.360732  | -0.225712 |
| 1  | -4.373512 | 4.382997  | 0.179716  |
| 1  | -4.794732 | 3.387155  | -1.221775 |
| 1  | -4.975835 | 2.738327  | 0.420962  |
| 6  | -2.022747 | 2.963409  | 1.615645  |
| 1  | -2.851197 | 2.686894  | 2.274555  |
| 1  | -1.158611 | 2.352128  | 1.877324  |
| 1  | -1.777492 | 4.014280  | 1.823035  |
| 6  | -3.736895 | 0.236061  | -0.724029 |
| 1  | -3.834861 | -0.637116 | -1.381435 |
| 1  | -4.571610 | 0.904793  | -0.954418 |
| 6  | -3.738542 | -0.229212 | 0.722428  |
| 1  | -4.575188 | -0.895825 | 0.952006  |
| 1  | -3.834792 | 0.644209  | 1.379724  |
| 6  | -2.339689 | -0.925756 | 0.914460  |
| 14 | -2.527455 | -2.777382 | 0.199371  |
| 6  | -2.028736 | -2.957782 | -1.617791 |
| 1  | -2.858214 | -2.683348 | -2.276122 |
| 1  | -1.166201 | -2.344322 | -1.880179 |
| 1  | -1.781028 | -4.007924 | -1.825653 |
| 6  | -1.523074 | -4.095436 | 1.141404  |
| 1  | -1.671494 | -5.055250 | 0.625577  |
| 1  | -0.450894 | -3.884894 | 1.137194  |
| 1  | -1.837991 | -4.231440 | 2.180615  |
| 6  | -4.350438 | -3.353586 | 0.222665  |
| 1  | -4.801533 | -3.381116 | 1.218760  |
| 1  | -4.981817 | -2.728889 | -0.422756 |
| 1  | -4.382144 | -4.375043 | -0.184648 |
| 14 | -2.274635 | -1.097131 | 2.892318  |
| 6  | -3.654585 | -2.305024 | 3.453022  |
| 1  | -3.522805 | -3.342898 | 3.135805  |

|   |           |           |          |
|---|-----------|-----------|----------|
| 1 | -3.650550 | -2.298104 | 4.552951 |
| 1 | -4.649694 | -1.972467 | 3.132817 |
| 6 | -0.688481 | -1.740238 | 3.698689 |
| 1 | 0.182431  | -1.133578 | 3.453204 |
| 1 | -0.820897 | -1.697822 | 4.789478 |
| 1 | -0.471216 | -2.778407 | 3.430845 |
| 6 | -2.808994 | 0.454998  | 3.873272 |
| 1 | -3.826880 | 0.769710  | 3.610069 |
| 1 | -2.830814 | 0.152279  | 4.930891 |
| 1 | -2.153500 | 1.321886  | 3.796165 |

-----  
-----  
**Si=Si=Si-Rea (singlet)**

| Atomic<br>Number | Coordinates (Angstroms) |           |           |
|------------------|-------------------------|-----------|-----------|
|                  | X                       | Y         | Z         |
| 14               | -2.072810               | 0.056458  | 0.051954  |
| 14               | -0.044246               | 0.050728  | -0.793548 |
| 14               | 2.034322                | 0.063994  | -0.013598 |
| 6                | 3.411066                | -0.999442 | -0.876246 |
| 14               | 3.074031                | -1.603771 | -2.706021 |
| 6                | 2.903587                | -0.193346 | -3.969954 |
| 1                | 2.767351                | -0.657614 | -4.958178 |
| 1                | 2.031250                | 0.439468  | -3.780142 |
| 1                | 3.791286                | 0.447708  | -4.032971 |
| 6                | 4.587942                | -2.598277 | -3.317989 |
| 1                | 4.748758                | -3.532368 | -2.768170 |
| 1                | 4.435607                | -2.859317 | -4.375230 |
| 1                | 5.510583                | -2.005311 | -3.257176 |
| 6                | 1.507351                | -2.676501 | -2.895986 |
| 1                | 0.999651                | -2.869352 | -1.946373 |
| 1                | 0.788015                | -2.167322 | -3.549591 |
| 1                | 1.750341                | -3.646819 | -3.350636 |
| 14               | 3.881898                | -2.581076 | 0.211655  |
| 6                | 3.439046                | -2.458834 | 2.057873  |
| 1                | 4.060961                | -1.738246 | 2.596001  |
| 1                | 2.385680                | -2.198318 | 2.222413  |
| 1                | 3.607312                | -3.445009 | 2.514779  |

|    |          |           |           |
|----|----------|-----------|-----------|
| 6  | 3.022416 | -4.189305 | -0.342909 |
| 1  | 3.190463 | -4.458297 | -1.390157 |
| 1  | 3.417685 | -5.007402 | 0.277081  |
| 1  | 1.939741 | -4.145409 | -0.174336 |
| 6  | 5.767810 | -2.861168 | 0.145538  |
| 1  | 6.006630 | -3.787403 | 0.687582  |
| 1  | 6.149257 | -2.964502 | -0.876623 |
| 1  | 6.318422 | -2.045713 | 0.632877  |
| 6  | 4.613224 | 0.032111  | -0.882072 |
| 1  | 4.532790 | 0.686705  | -1.761141 |
| 1  | 5.581892 | -0.476877 | -0.961273 |
| 6  | 4.580600 | 0.914596  | 0.394264  |
| 1  | 5.348407 | 1.696932  | 0.332211  |
| 1  | 4.847866 | 0.285782  | 1.255639  |
| 6  | 3.139719 | 1.540017  | 0.609656  |
| 14 | 2.942305 | 3.165555  | -0.490802 |
| 6  | 1.526896 | 4.284053  | 0.116761  |
| 1  | 0.577809 | 3.735162  | 0.164112  |
| 1  | 1.711507 | 4.739032  | 1.095840  |
| 1  | 1.399527 | 5.100595  | -0.608207 |
| 6  | 4.579045 | 4.148706  | -0.462387 |
| 1  | 4.411989 | 5.119639  | -0.950855 |
| 1  | 4.959852 | 4.342751  | 0.545023  |
| 1  | 5.364093 | 3.631766  | -1.030521 |
| 6  | 2.576246 | 2.899666  | -2.334910 |
| 1  | 3.377701 | 2.370281  | -2.859149 |
| 1  | 1.638736 | 2.358495  | -2.502173 |
| 1  | 2.478132 | 3.891853  | -2.800194 |
| 14 | 2.891506 | 2.022421  | 2.490399  |
| 6  | 1.072263 | 2.324357  | 2.930774  |
| 1  | 0.436535 | 1.522083  | 2.539590  |
| 1  | 0.958502 | 2.336267  | 4.024193  |
| 1  | 0.688243 | 3.273418  | 2.544206  |
| 6  | 3.498754 | 0.680971  | 3.697731  |
| 1  | 4.535133 | 0.367174  | 3.521098  |
| 1  | 3.459313 | 1.109213  | 4.710031  |
| 1  | 2.861173 | -0.209022 | 3.693134  |
| 6  | 3.908127 | 3.566608  | 2.967447  |
| 1  | 3.586669 | 4.480493  | 2.455882  |
| 1  | 3.791014 | 3.735566  | 4.047749  |

|    |           |           |           |
|----|-----------|-----------|-----------|
| 1  | 4.979759  | 3.426034  | 2.772881  |
| 6  | -3.604176 | 0.485764  | -1.061340 |
| 14 | -3.404471 | 0.010497  | -2.952897 |
| 6  | -3.111598 | -1.855808 | -3.191843 |
| 1  | -2.904523 | -2.032895 | -4.257266 |
| 1  | -2.247220 | -2.221568 | -2.625180 |
| 1  | -3.989054 | -2.458409 | -2.928247 |
| 6  | -5.022520 | 0.389381  | -3.894358 |
| 1  | -5.212148 | 1.463980  | -4.005552 |
| 1  | -4.952410 | -0.037681 | -4.905170 |
| 1  | -5.896832 | -0.062034 | -3.406870 |
| 6  | -1.987497 | 0.874452  | -3.881630 |
| 1  | -2.131194 | 1.952988  | -3.994506 |
| 1  | -1.018807 | 0.707661  | -3.393275 |
| 1  | -1.929017 | 0.438280  | -4.890546 |
| 14 | -4.182338 | 2.356521  | -0.907686 |
| 6  | -3.336547 | 3.517333  | -2.157172 |
| 1  | -3.667640 | 3.354713  | -3.189284 |
| 1  | -3.590376 | 4.552753  | -1.888635 |
| 1  | -2.243659 | 3.426350  | -2.128882 |
| 6  | -6.069530 | 2.481751  | -1.166612 |
| 1  | -6.345165 | 3.543860  | -1.238529 |
| 1  | -6.417619 | 1.985294  | -2.078182 |
| 1  | -6.623222 | 2.059816  | -0.317223 |
| 6  | -3.869220 | 3.160845  | 0.785690  |
| 1  | -4.387071 | 2.644444  | 1.601064  |
| 1  | -2.804061 | 3.213094  | 1.037653  |
| 1  | -4.254385 | 4.190667  | 0.751285  |
| 6  | -4.697705 | -0.463349 | -0.410266 |
| 1  | -4.652477 | -1.451449 | -0.880522 |
| 1  | -5.712454 | -0.082886 | -0.583173 |
| 6  | -4.463520 | -0.641763 | 1.117667  |
| 1  | -5.138300 | -1.418551 | 1.506589  |
| 1  | -4.747066 | 0.291929  | 1.626823  |
| 6  | -2.950282 | -0.995460 | 1.435133  |
| 14 | -2.661911 | -2.936613 | 1.285175  |
| 6  | -0.850551 | -3.399976 | 0.957817  |
| 1  | -0.759067 | -4.495699 | 0.935655  |
| 1  | -0.505578 | -3.005995 | -0.005031 |
| 1  | -0.175266 | -3.020721 | 1.733541  |

|    |           |           |           |
|----|-----------|-----------|-----------|
| 6  | -3.197471 | -3.871402 | 2.865330  |
| 1  | -3.104221 | -4.947160 | 2.656846  |
| 1  | -2.576907 | -3.652700 | 3.740968  |
| 1  | -4.244876 | -3.679247 | 3.129875  |
| 6  | -3.716044 | -3.763659 | -0.067449 |
| 1  | -4.787833 | -3.557985 | 0.050993  |
| 1  | -3.418411 | -3.484240 | -1.080565 |
| 1  | -3.581910 | -4.851141 | 0.027483  |
| 14 | -2.515690 | -0.421801 | 3.253471  |
| 6  | -3.880289 | -0.951025 | 4.478430  |
| 1  | -3.886205 | -2.021736 | 4.698827  |
| 1  | -3.728724 | -0.414431 | 5.426198  |
| 1  | -4.876098 | -0.675788 | 4.105431  |
| 6  | -0.832587 | -1.108031 | 3.818162  |
| 1  | -0.040205 | -0.845959 | 3.105293  |
| 1  | -0.566403 | -0.667824 | 4.789298  |
| 1  | -0.831403 | -2.197473 | 3.937789  |
| 6  | -2.443682 | 1.467307  | 3.469751  |
| 1  | -3.442850 | 1.917223  | 3.447178  |
| 1  | -2.012651 | 1.678243  | 4.459455  |
| 1  | -1.823915 | 1.975937  | 2.726317  |

-----  
-----  
**Si=Ge=Si-Rea (singlet)**  
-----

| Atomic<br>Number | Coordinates (Angstroms) |           |           |
|------------------|-------------------------|-----------|-----------|
|                  | X                       | Y         | Z         |
| 14               | -2.100181               | 0.056404  | 0.085281  |
| 32               | -0.037112               | 0.080457  | -0.958948 |
| 14               | 2.075321                | 0.068557  | 0.032785  |
| 6                | 3.522387                | -0.840562 | -0.898334 |
| 14               | 3.285175                | -1.267732 | -2.792452 |
| 6                | 3.174148                | 0.258473  | -3.922783 |
| 1                | 3.082788                | -0.106829 | -4.956655 |
| 1                | 2.297825                | 0.879892  | -3.715119 |
| 1                | 4.067999                | 0.893310  | -3.881206 |
| 6                | 4.835704                | -2.191578 | -3.422926 |
| 1                | 4.965505                | -3.185936 | -2.981323 |



|    |          |           |           |
|----|----------|-----------|-----------|
| 1  | 4.749412 | -2.321709 | -4.511349 |
| 1  | 5.750715 | -1.613859 | -3.234044 |
| 6  | 1.738568 | -2.314531 | -3.180168 |
| 1  | 1.346902 | -2.860190 | -2.315218 |
| 1  | 0.932364 | -1.670615 | -3.557488 |
| 1  | 1.975139 | -3.052971 | -3.963062 |
| 14 | 4.001393 | -2.511819 | 0.046371  |
| 6  | 3.505934 | -2.579045 | 1.883137  |
| 1  | 4.095127 | -1.899164 | 2.504692  |
| 1  | 2.441720 | -2.361908 | 2.043820  |
| 1  | 3.689033 | -3.600642 | 2.247502  |
| 6  | 3.195317 | -4.080032 | -0.679717 |
| 1  | 3.367166 | -4.231641 | -1.749629 |
| 1  | 3.620365 | -4.944776 | -0.149150 |
| 1  | 2.112473 | -4.090935 | -0.503089 |
| 6  | 5.894794 | -2.743628 | 0.013512  |
| 1  | 6.140141 | -3.711345 | 0.474164  |
| 1  | 6.309333 | -2.741925 | -1.000702 |
| 1  | 6.410613 | -1.966211 | 0.592475  |
| 6  | 4.692803 | 0.215792  | -0.750477 |
| 1  | 4.621707 | 0.961679  | -1.554273 |
| 1  | 5.679009 | -0.255252 | -0.850403 |
| 6  | 4.589874 | 0.950055  | 0.612034  |
| 1  | 5.330948 | 1.758648  | 0.663570  |
| 1  | 4.851593 | 0.239624  | 1.409207  |
| 6  | 3.122131 | 1.501763  | 0.841001  |
| 14 | 2.905217 | 3.222832  | -0.103205 |
| 6  | 1.423431 | 4.225849  | 0.546555  |
| 1  | 0.491448 | 3.651574  | 0.464057  |
| 1  | 1.531706 | 4.561585  | 1.583315  |
| 1  | 1.314103 | 5.121508  | -0.081542 |
| 6  | 4.503260 | 4.250748  | 0.085788  |
| 1  | 4.315705 | 5.263441  | -0.299517 |
| 1  | 4.849098 | 4.345327  | 1.119490  |
| 1  | 5.321321 | 3.824285  | -0.510259 |
| 6  | 2.619428 | 3.135973  | -1.979025 |
| 1  | 3.456132 | 2.684277  | -2.520472 |
| 1  | 1.705214 | 2.590948  | -2.238514 |
| 1  | 2.509034 | 4.167886  | -2.344589 |
| 14 | 2.799293 | 1.794774  | 2.748649  |

|    |           |           |           |
|----|-----------|-----------|-----------|
| 6  | 0.954540  | 1.959488  | 3.149344  |
| 1  | 0.391189  | 1.114438  | 2.738363  |
| 1  | 0.813380  | 1.954937  | 4.239352  |
| 1  | 0.508639  | 2.878345  | 2.757946  |
| 6  | 3.442663  | 0.379868  | 3.848657  |
| 1  | 4.496202  | 0.129769  | 3.670870  |
| 1  | 3.361987  | 0.712853  | 4.893770  |
| 1  | 2.848514  | -0.534371 | 3.749418  |
| 6  | 3.717187  | 3.337122  | 3.401625  |
| 1  | 3.380185  | 4.276772  | 2.950430  |
| 1  | 3.540652  | 3.409319  | 4.484623  |
| 1  | 4.802435  | 3.257839  | 3.252567  |
| 6  | -3.663832 | 0.544676  | -0.974037 |
| 14 | -3.478425 | 0.353713  | -2.916737 |
| 6  | -3.085522 | -1.436996 | -3.429936 |
| 1  | -2.915295 | -1.447368 | -4.516322 |
| 1  | -2.175372 | -1.816846 | -2.951133 |
| 1  | -3.909838 | -2.130014 | -3.224015 |
| 6  | -5.135892 | 0.768628  | -3.769675 |
| 1  | -5.380871 | 1.836957  | -3.730549 |
| 1  | -5.069678 | 0.485040  | -4.829968 |
| 1  | -5.973606 | 0.210225  | -3.331531 |
| 6  | -2.136891 | 1.422032  | -3.742605 |
| 1  | -2.344501 | 2.494564  | -3.699974 |
| 1  | -1.144075 | 1.249292  | -3.308975 |
| 1  | -2.084183 | 1.134209  | -4.803167 |
| 14 | -4.328484 | 2.348724  | -0.554310 |
| 6  | -3.583600 | 3.712361  | -1.655527 |
| 1  | -3.937194 | 3.671760  | -2.692111 |
| 1  | -3.884904 | 4.685696  | -1.242658 |
| 1  | -2.487058 | 3.682292  | -1.665092 |
| 6  | -6.226471 | 2.407296  | -0.753120 |
| 1  | -6.557163 | 3.453065  | -0.673847 |
| 1  | -6.572862 | 2.020684  | -1.717188 |
| 1  | -6.734976 | 1.845132  | 0.041429  |
| 6  | -4.002892 | 2.946269  | 1.220260  |
| 1  | -4.484573 | 2.315907  | 1.974956  |
| 1  | -2.934403 | 3.005188  | 1.456066  |
| 1  | -4.422400 | 3.958145  | 1.320544  |
| 6  | -4.711447 | -0.531932 | -0.464374 |

|    |           |           |           |
|----|-----------|-----------|-----------|
| 1  | -4.612285 | -1.449026 | -1.054641 |
| 1  | -5.743927 | -0.185021 | -0.600790 |
| 6  | -4.475829 | -0.885562 | 1.030277  |
| 1  | -5.114808 | -1.734428 | 1.316350  |
| 1  | -4.806022 | -0.034804 | 1.646270  |
| 6  | -2.947630 | -1.203348 | 1.317233  |
| 14 | -2.579188 | -3.098315 | 0.929563  |
| 6  | -0.739150 | -3.482238 | 0.660492  |
| 1  | -0.622081 | -4.566406 | 0.516773  |
| 1  | -0.352895 | -2.975185 | -0.231255 |
| 1  | -0.113135 | -3.185268 | 1.509090  |
| 6  | -3.190367 | -4.237533 | 2.339082  |
| 1  | -3.062169 | -5.276750 | 2.003252  |
| 1  | -2.631222 | -4.123294 | 3.273828  |
| 1  | -4.256250 | -4.092975 | 2.556775  |
| 6  | -3.510955 | -3.773693 | -0.587270 |
| 1  | -4.598045 | -3.645389 | -0.504718 |
| 1  | -3.179591 | -3.334974 | -1.531186 |
| 1  | -3.314728 | -4.854824 | -0.638834 |
| 14 | -2.566633 | -0.858513 | 3.206092  |
| 6  | -3.963334 | -1.545951 | 4.310718  |
| 1  | -3.993282 | -2.637799 | 4.357630  |
| 1  | -3.818279 | -1.169767 | 5.333870  |
| 1  | -4.946830 | -1.193886 | 3.971652  |
| 6  | -0.903476 | -1.603034 | 3.759829  |
| 1  | -0.071200 | -1.231754 | 3.148449  |
| 1  | -0.708827 | -1.305395 | 4.799882  |
| 1  | -0.887816 | -2.698081 | 3.722411  |
| 6  | -2.511324 | 0.987529  | 3.664988  |
| 1  | -3.513865 | 1.428301  | 3.699616  |
| 1  | -2.081991 | 1.072369  | 4.673935  |
| 1  | -1.895181 | 1.591508  | 2.993610  |

-----  
-----  
**Ge=Si=Ge-Rea (singlet)**  
-----  
-----

| Atomic | Coordinates (Angstroms) |   |   |
|--------|-------------------------|---|---|
| Number | X                       | Y | Z |

-----  
-----

|    |           |           |           |
|----|-----------|-----------|-----------|
| 32 | -2.088595 | 0.083045  | 0.025715  |
| 14 | -0.040714 | -0.056275 | -1.006296 |
| 32 | 2.054182  | 0.049753  | -0.024071 |
| 6  | 3.578417  | -1.012954 | -0.840453 |
| 14 | 3.301461  | -1.703789 | -2.646646 |
| 6  | 3.145035  | -0.347308 | -3.970611 |
| 1  | 3.030207  | -0.848096 | -4.943481 |
| 1  | 2.264968  | 0.285899  | -3.820797 |
| 1  | 4.029796  | 0.297685  | -4.040225 |
| 6  | 4.839084  | -2.709767 | -3.177847 |
| 1  | 4.983042  | -3.626496 | -2.594484 |
| 1  | 4.723318  | -3.003372 | -4.231185 |
| 1  | 5.757919  | -2.112410 | -3.103496 |
| 6  | 1.753757  | -2.804659 | -2.830662 |
| 1  | 1.320998  | -3.116316 | -1.874215 |
| 1  | 0.971922  | -2.263466 | -3.380326 |
| 1  | 1.999397  | -3.714872 | -3.399241 |
| 14 | 4.075355  | -2.509540 | 0.339719  |
| 6  | 3.635626  | -2.281824 | 2.178959  |
| 1  | 4.228515  | -1.499660 | 2.661664  |
| 1  | 2.572135  | -2.061695 | 2.342339  |
| 1  | 3.853446  | -3.226433 | 2.698839  |
| 6  | 3.238978  | -4.160309 | -0.115862 |
| 1  | 3.395055  | -4.477758 | -1.151573 |
| 1  | 3.656832  | -4.940340 | 0.537321  |
| 1  | 2.157808  | -4.125821 | 0.068342  |
| 6  | 5.966493  | -2.758292 | 0.294112  |
| 1  | 6.223149  | -3.643745 | 0.893166  |
| 1  | 6.351643  | -2.916985 | -0.719385 |
| 1  | 6.499622  | -1.902883 | 0.730012  |
| 6  | 4.717002  | 0.083922  | -0.851870 |
| 1  | 4.626202  | 0.701953  | -1.755715 |
| 1  | 5.713427  | -0.376272 | -0.892686 |
| 6  | 4.631126  | 1.016477  | 0.390077  |
| 1  | 5.390221  | 1.806929  | 0.307448  |
| 1  | 4.896342  | 0.427470  | 1.279582  |
| 6  | 3.187016  | 1.636949  | 0.567272  |
| 14 | 2.949253  | 3.189787  | -0.618303 |
| 6  | 1.470929  | 4.269354  | -0.095601 |
| 1  | 0.543701  | 3.682358  | -0.064442 |

|    |           |           |           |
|----|-----------|-----------|-----------|
| 1  | 1.601050  | 4.760527  | 0.874786  |
| 1  | 1.335000  | 5.058008  | -0.849279 |
| 6  | 4.545220  | 4.238628  | -0.600461 |
| 1  | 4.356744  | 5.175989  | -1.143571 |
| 1  | 4.889936  | 4.498264  | 0.405198  |
| 1  | 5.364383  | 3.722842  | -1.119488 |
| 6  | 2.640144  | 2.820792  | -2.456210 |
| 1  | 3.471703  | 2.294874  | -2.935351 |
| 1  | 1.724691  | 2.241642  | -2.619708 |
| 1  | 2.521269  | 3.785462  | -2.972017 |
| 14 | 2.892164  | 2.187344  | 2.419037  |
| 6  | 1.050743  | 2.392923  | 2.823666  |
| 1  | 0.486936  | 1.494480  | 2.546374  |
| 1  | 0.926978  | 2.541432  | 3.905723  |
| 1  | 0.590839  | 3.245177  | 2.314402  |
| 6  | 3.565144  | 0.942045  | 3.693628  |
| 1  | 4.621596  | 0.687531  | 3.541161  |
| 1  | 3.486101  | 1.411306  | 4.685164  |
| 1  | 2.986529  | 0.012907  | 3.724283  |
| 6  | 3.802223  | 3.812500  | 2.841523  |
| 1  | 3.440695  | 4.680048  | 2.278504  |
| 1  | 3.650286  | 4.025937  | 3.909581  |
| 1  | 4.884508  | 3.726256  | 2.675968  |
| 6  | -3.748063 | 0.392446  | -1.104214 |
| 14 | -3.559969 | -0.129469 | -2.981238 |
| 6  | -3.186065 | -1.986304 | -3.176273 |
| 1  | -3.012164 | -2.187437 | -4.243396 |
| 1  | -2.282122 | -2.290011 | -2.634823 |
| 1  | -4.020401 | -2.622855 | -2.857614 |
| 6  | -5.209842 | 0.152650  | -3.902289 |
| 1  | -5.446557 | 1.215121  | -4.039187 |
| 1  | -5.141495 | -0.299977 | -4.902080 |
| 1  | -6.054565 | -0.320297 | -3.383753 |
| 6  | -2.200307 | 0.776298  | -3.955408 |
| 1  | -2.395156 | 1.844427  | -4.087637 |
| 1  | -1.214931 | 0.664515  | -3.485259 |
| 1  | -2.139553 | 0.322294  | -4.955844 |
| 14 | -4.406303 | 2.233749  | -0.976807 |
| 6  | -3.639929 | 3.403818  | -2.268825 |
| 1  | -3.982580 | 3.199451  | -3.289799 |

|    |           |           |           |
|----|-----------|-----------|-----------|
| 1  | -3.937849 | 4.432580  | -2.020781 |
| 1  | -2.543313 | 3.365746  | -2.261939 |
| 6  | -6.302120 | 2.269397  | -1.197299 |
| 1  | -6.630721 | 3.316506  | -1.267662 |
| 1  | -6.641365 | 1.752460  | -2.100996 |
| 1  | -6.819407 | 1.824015  | -0.336893 |
| 6  | -4.092084 | 3.086790  | 0.694472  |
| 1  | -4.596313 | 2.581233  | 1.525661  |
| 1  | -3.026064 | 3.164139  | 0.938156  |
| 1  | -4.494550 | 4.108966  | 0.639208  |
| 6  | -4.757287 | -0.594438 | -0.386502 |
| 1  | -4.660261 | -1.596431 | -0.818146 |
| 1  | -5.798338 | -0.286113 | -0.553623 |
| 6  | -4.504442 | -0.701627 | 1.147577  |
| 1  | -5.161615 | -1.479589 | 1.565482  |
| 1  | -4.818040 | 0.243138  | 1.617740  |
| 6  | -2.990502 | -1.004166 | 1.496534  |
| 14 | -2.629936 | -2.932340 | 1.405665  |
| 6  | -0.791573 | -3.356220 | 1.183301  |
| 1  | -0.680766 | -4.450155 | 1.160271  |
| 1  | -0.397852 | -2.952456 | 0.242863  |
| 1  | -0.168621 | -2.973245 | 1.999843  |
| 6  | -3.226795 | -3.828550 | 2.987400  |
| 1  | -3.111774 | -4.909422 | 2.820734  |
| 1  | -2.651320 | -3.572061 | 3.883723  |
| 1  | -4.287884 | -3.640775 | 3.196164  |
| 6  | -3.580643 | -3.830128 | 0.022283  |
| 1  | -4.665536 | -3.676147 | 0.088898  |
| 1  | -3.250669 | -3.549473 | -0.980800 |
| 1  | -3.397522 | -4.908254 | 0.140303  |
| 14 | -2.583419 | -0.343745 | 3.289285  |
| 6  | -3.972177 | -0.817236 | 4.509392  |
| 1  | -4.009197 | -1.887234 | 4.734267  |
| 1  | -3.812723 | -0.280467 | 5.455888  |
| 1  | -4.957152 | -0.517340 | 4.126623  |
| 6  | -0.920459 | -1.009651 | 3.935159  |
| 1  | -0.099841 | -0.785601 | 3.241539  |
| 1  | -0.685833 | -0.525493 | 4.893543  |
| 1  | -0.930486 | -2.092090 | 4.106151  |
| 6  | -2.490204 | 1.553367  | 3.412067  |

|   |           |          |          |
|---|-----------|----------|----------|
| 1 | -3.477018 | 2.020504 | 3.322481 |
| 1 | -2.095127 | 1.810903 | 4.405734 |
| 1 | -1.828193 | 2.009378 | 2.669117 |

-----  
-----  
**Ge=Ge=Ge-Rea (singlet)**  
-----

| Atomic<br>Number | Coordinates (Angstroms) |           |           |
|------------------|-------------------------|-----------|-----------|
|                  | X                       | Y         | Z         |
| 32               | -2.138204               | 0.117476  | -0.030800 |
| 32               | -0.047469               | -0.822757 | -0.757384 |
| 32               | 2.100553                | 0.040688  | -0.030393 |
| 6                | 3.649255                | -1.276481 | 0.087465  |
| 14               | 3.407816                | -3.015907 | -0.766122 |
| 6                | 3.265628                | -2.926499 | -2.661136 |
| 1                | 3.171570                | -3.957311 | -3.033901 |
| 1                | 2.379640                | -2.375326 | -2.991761 |
| 1                | 4.147616                | -2.486284 | -3.142744 |
| 6                | 4.955300                | -4.096771 | -0.458668 |
| 1                | 5.093038                | -4.369830 | 0.593990  |
| 1                | 4.854922                | -5.030063 | -1.031562 |
| 1                | 5.871667                | -3.598112 | -0.802568 |
| 6                | 1.867831                | -3.971782 | -0.163397 |
| 1                | 1.372395                | -3.508264 | 0.696230  |
| 1                | 1.126930                | -4.037328 | -0.971705 |
| 1                | 2.141573                | -4.998120 | 0.124607  |
| 14               | 4.131725                | -1.565709 | 1.975584  |
| 6                | 3.668977                | -0.152034 | 3.165126  |
| 1                | 4.249398                | 0.757381  | 2.986477  |
| 1                | 2.601785                | 0.104746  | 3.132837  |
| 1                | 3.889958                | -0.486061 | 4.189646  |
| 6                | 3.297292                | -3.092043 | 2.754057  |
| 1                | 3.471604                | -4.029001 | 2.216037  |
| 1                | 3.698476                | -3.213481 | 3.770886  |
| 1                | 2.212809                | -2.952101 | 2.846285  |
| 6                | 6.023325                | -1.762098 | 2.130465  |
| 1                | 6.272081                | -2.000298 | 3.174563  |
| 1                | 6.422818                | -2.564216 | 1.500066  |

|    |           |           |           |
|----|-----------|-----------|-----------|
| 1  | 6.549960  | -0.833691 | 1.872555  |
| 6  | 4.784801  | -0.466378 | -0.655621 |
| 1  | 4.703083  | -0.623847 | -1.739948 |
| 1  | 5.783617  | -0.822052 | -0.367931 |
| 6  | 4.679917  | 1.058742  | -0.372976 |
| 1  | 5.436475  | 1.594061  | -0.964029 |
| 1  | 4.936291  | 1.230757  | 0.682059  |
| 6  | 3.230665  | 1.616886  | -0.670686 |
| 14 | 2.999180  | 1.943372  | -2.598274 |
| 6  | 1.508745  | 3.070628  | -2.961381 |
| 1  | 0.582262  | 2.646145  | -2.552150 |
| 1  | 1.619625  | 4.090817  | -2.578229 |
| 1  | 1.384693  | 3.138689  | -4.051602 |
| 6  | 4.589727  | 2.739774  | -3.293627 |
| 1  | 4.402058  | 3.052744  | -4.330893 |
| 1  | 4.923111  | 3.618993  | -2.733955 |
| 1  | 5.416393  | 2.016976  | -3.317977 |
| 6  | 2.713914  | 0.419642  | -3.698024 |
| 1  | 3.554927  | -0.280489 | -3.690706 |
| 1  | 1.804563  | -0.129311 | -3.429230 |
| 1  | 2.593341  | 0.776879  | -4.731790 |
| 14 | 2.915540  | 3.280678  | 0.305205  |
| 6  | 1.070753  | 3.695758  | 0.449435  |
| 1  | 0.513428  | 2.857738  | 0.884041  |
| 1  | 0.940671  | 4.560515  | 1.116014  |
| 1  | 0.608068  | 3.941688  | -0.511166 |
| 6  | 3.577946  | 3.245960  | 2.090716  |
| 1  | 4.635938  | 2.963246  | 2.158923  |
| 1  | 3.489469  | 4.265125  | 2.494518  |
| 1  | 3.000226  | 2.584092  | 2.744129  |
| 6  | 3.818810  | 4.764130  | -0.489621 |
| 1  | 3.459919  | 5.012102  | -1.494591 |
| 1  | 3.657888  | 5.647466  | 0.145335  |
| 1  | 4.902469  | 4.595627  | -0.547127 |
| 6  | -3.835012 | -0.455683 | -1.008661 |
| 14 | -3.686254 | -2.132459 | -2.005556 |
| 6  | -3.290405 | -3.611849 | -0.873814 |
| 1  | -3.147295 | -4.497625 | -1.509820 |
| 1  | -2.365066 | -3.465960 | -0.303284 |
| 1  | -4.103921 | -3.841068 | -0.174739 |



|    |           |           |           |
|----|-----------|-----------|-----------|
| 6  | -5.358824 | -2.558262 | -2.824996 |
| 1  | -5.604927 | -1.893896 | -3.662829 |
| 1  | -5.310651 | -3.582837 | -3.221248 |
| 1  | -6.188243 | -2.521376 | -2.106134 |
| 6  | -2.365591 | -2.170988 | -3.375992 |
| 1  | -2.556812 | -1.465018 | -4.188896 |
| 1  | -1.357302 | -1.977034 | -2.988300 |
| 1  | -2.357748 | -3.182598 | -3.808383 |
| 14 | -4.518018 | 0.964051  | -2.174320 |
| 6  | -3.779730 | 0.919125  | -3.929290 |
| 1  | -4.135315 | 0.068674  | -4.522596 |
| 1  | -4.081194 | 1.836709  | -4.454519 |
| 1  | -2.682497 | 0.891617  | -3.913841 |
| 6  | -6.417174 | 0.838774  | -2.325339 |
| 1  | -6.759487 | 1.554071  | -3.087417 |
| 1  | -6.762465 | -0.156494 | -2.623442 |
| 1  | -6.916947 | 1.103701  | -1.383816 |
| 6  | -4.196037 | 2.736265  | -1.561051 |
| 1  | -4.683801 | 2.943976  | -0.601937 |
| 1  | -3.128553 | 2.963004  | -1.457687 |
| 1  | -4.613747 | 3.435701  | -2.300165 |
| 6  | -4.812826 | -0.666858 | 0.218042  |
| 1  | -4.704906 | -1.687017 | 0.602109  |
| 1  | -5.862921 | -0.562763 | -0.089324 |
| 6  | -4.530094 | 0.323418  | 1.386390  |
| 1  | -5.166632 | 0.057091  | 2.244557  |
| 1  | -4.850936 | 1.329115  | 1.073831  |
| 6  | -3.005088 | 0.348445  | 1.807843  |
| 14 | -2.616260 | -1.099898 | 3.074731  |
| 6  | -0.773392 | -1.549964 | 3.190489  |
| 1  | -0.653105 | -2.355808 | 3.929619  |
| 1  | -0.384816 | -1.907983 | 2.228953  |
| 1  | -0.150326 | -0.706034 | 3.509489  |
| 6  | -3.196290 | -0.649453 | 4.842070  |
| 1  | -3.073447 | -1.542802 | 5.471422  |
| 1  | -2.618198 | 0.158810  | 5.303584  |
| 1  | -4.257831 | -0.371443 | 4.872067  |
| 6  | -3.557946 | -2.715466 | 2.716549  |
| 1  | -4.645474 | -2.569021 | 2.679596  |
| 1  | -3.241283 | -3.203848 | 1.791767  |

|    |           |           |          |
|----|-----------|-----------|----------|
| 1  | -3.351185 | -3.410060 | 3.544071 |
| 14 | -2.576653 | 2.067859  | 2.630897 |
| 6  | -3.948080 | 2.586613  | 3.852467 |
| 1  | -3.986138 | 1.966031  | 4.752736 |
| 1  | -3.770788 | 3.625194  | 4.167545 |
| 1  | -4.937769 | 2.554432  | 3.377029 |
| 6  | -0.905333 | 2.028536  | 3.544073 |
| 1  | -0.094735 | 1.684750  | 2.888683 |
| 1  | -0.653720 | 3.045101  | 3.877753 |
| 1  | -0.917642 | 1.383723  | 4.430258 |
| 6  | -2.481594 | 3.515465  | 1.398405 |
| 1  | -3.468292 | 3.794214  | 1.013149 |
| 1  | -2.078387 | 4.389618  | 1.930385 |
| 1  | -1.824302 | 3.320416  | 0.544726 |

-----  
-----  
**Sn=Sn=Sn-Rea (singlet)**

| Atomic<br>Number | Coordinates (Angstroms) |           |           |
|------------------|-------------------------|-----------|-----------|
|                  | X                       | Y         | Z         |
| 50               | -2.373819               | -0.005288 | -0.146901 |
| 50               | -0.026447               | -1.551499 | -0.218105 |
| 50               | 2.347499                | -0.055053 | -0.007451 |
| 6                | 4.225469                | -1.034188 | 0.646780  |
| 14               | 4.336494                | -2.961658 | 0.397290  |
| 6                | 4.374901                | -3.483371 | -1.433793 |
| 1                | 4.483677                | -4.577386 | -1.467285 |
| 1                | 3.450826                | -3.229895 | -1.964679 |
| 1                | 5.220656                | -3.057468 | -1.988067 |
| 6                | 5.975163                | -3.633118 | 1.120818  |
| 1                | 6.039758                | -3.545481 | 2.211692  |
| 1                | 6.066610                | -4.699627 | 0.869457  |
| 1                | 6.843903                | -3.118785 | 0.687827  |
| 6                | 2.894082                | -3.942609 | 1.158114  |
| 1                | 2.721366                | -3.729878 | 2.216638  |
| 1                | 1.955984                | -3.756817 | 0.617450  |
| 1                | 3.110762                | -5.016995 | 1.065177  |
| 14               | 4.587428                | -0.581840 | 2.518399  |

|    |          |           |           |
|----|----------|-----------|-----------|
| 6  | 3.800146 | 1.045916  | 3.127590  |
| 1  | 4.188656 | 1.929958  | 2.613664  |
| 1  | 2.704243 | 1.047827  | 3.039006  |
| 1  | 4.035183 | 1.159663  | 4.196308  |
| 6  | 3.942298 | -1.874621 | 3.761801  |
| 1  | 4.390306 | -2.867193 | 3.644605  |
| 1  | 4.184742 | -1.519820 | 4.773963  |
| 1  | 2.851466 | -1.982920 | 3.707649  |
| 6  | 6.466777 | -0.388488 | 2.783547  |
| 1  | 6.667365 | -0.235920 | 3.853627  |
| 1  | 7.027807 | -1.273168 | 2.460959  |
| 1  | 6.867880 | 0.481987  | 2.247873  |
| 6  | 5.260441 | -0.314268 | -0.311140 |
| 1  | 5.284182 | -0.825994 | -1.283338 |
| 1  | 6.280550 | -0.386937 | 0.094295  |
| 6  | 4.936741 | 1.187049  | -0.566998 |
| 1  | 5.713900 | 1.605411  | -1.223723 |
| 1  | 5.027336 | 1.724271  | 0.388176  |
| 6  | 3.501930 | 1.430722  | -1.186090 |
| 14 | 3.493968 | 1.023920  | -3.103951 |
| 6  | 2.058880 | 1.849588  | -4.048419 |
| 1  | 1.081399 | 1.501546  | -3.690134 |
| 1  | 2.070155 | 2.943929  | -4.007888 |
| 1  | 2.140667 | 1.558019  | -5.105335 |
| 6  | 5.137536 | 1.617540  | -3.873664 |
| 1  | 5.085930 | 1.497906  | -4.965327 |
| 1  | 5.349898 | 2.671558  | -3.662074 |
| 1  | 5.989820 | 1.021780  | -3.520710 |
| 6  | 3.343253 | -0.814729 | -3.572033 |
| 1  | 4.207783 | -1.408068 | -3.260884 |
| 1  | 2.439210 | -1.285828 | -3.165856 |
| 1  | 3.279201 | -0.879406 | -4.668473 |
| 14 | 2.926982 | 3.262628  | -0.892934 |
| 6  | 1.055416 | 3.466834  | -1.142914 |
| 1  | 0.499432 | 2.781757  | -0.489693 |
| 1  | 0.753500 | 4.489712  | -0.878615 |
| 1  | 0.735650 | 3.278599  | -2.171590 |
| 6  | 3.280789 | 3.883278  | 0.873280  |
| 1  | 4.343886 | 3.839968  | 1.141944  |
| 1  | 2.977092 | 4.938910  | 0.925753  |

|    |           |           |           |
|----|-----------|-----------|-----------|
| 1  | 2.710839  | 3.342317  | 1.637085  |
| 6  | 3.853422  | 4.489192  | -2.027176 |
| 1  | 3.646825  | 4.337904  | -3.092874 |
| 1  | 3.546662  | 5.514082  | -1.773228 |
| 1  | 4.940430  | 4.427086  | -1.881337 |
| 6  | -4.296894 | -1.053448 | -0.535794 |
| 14 | -4.229382 | -2.987227 | -0.312462 |
| 6  | -3.797886 | -3.499569 | 1.471102  |
| 1  | -3.758779 | -4.597909 | 1.510237  |
| 1  | -2.814735 | -3.127514 | 1.784611  |
| 1  | -4.543856 | -3.173445 | 2.205645  |
| 6  | -5.944072 | -3.758220 | -0.659073 |
| 1  | -6.232389 | -3.692508 | -1.715386 |
| 1  | -5.922139 | -4.823505 | -0.387861 |
| 1  | -6.732578 | -3.281737 | -0.061408 |
| 6  | -2.968367 | -3.890279 | -1.416981 |
| 1  | -3.118848 | -3.720112 | -2.486573 |
| 1  | -1.933407 | -3.614846 | -1.173855 |
| 1  | -3.062695 | -4.971053 | -1.234926 |
| 14 | -5.042854 | -0.584522 | -2.278088 |
| 6  | -4.487265 | -1.740919 | -3.686876 |
| 1  | -4.873624 | -2.761775 | -3.585027 |
| 1  | -4.870897 | -1.336789 | -4.634615 |
| 1  | -3.394352 | -1.795483 | -3.771631 |
| 6  | -6.950592 | -0.620714 | -2.207984 |
| 1  | -7.350820 | -0.474397 | -3.221645 |
| 1  | -7.341805 | -1.571022 | -1.828222 |
| 1  | -7.350920 | 0.186069  | -1.579602 |
| 6  | -4.595909 | 1.162957  | -2.891457 |
| 1  | -5.013774 | 1.948409  | -2.251392 |
| 1  | -3.513349 | 1.325034  | -2.971429 |
| 1  | -5.021176 | 1.299566  | -3.896583 |
| 6  | -5.175213 | -0.429212 | 0.624380  |
| 1  | -5.006953 | -0.986946 | 1.551881  |
| 1  | -6.246971 | -0.534316 | 0.397837  |
| 6  | -4.890449 | 1.076288  | 0.908204  |
| 1  | -5.543360 | 1.400481  | 1.734842  |
| 1  | -5.218691 | 1.654144  | 0.030365  |
| 6  | -3.377411 | 1.411301  | 1.244963  |
| 14 | -2.982030 | 1.059438  | 3.125322  |

|    |           |           |           |
|----|-----------|-----------|-----------|
| 6  | -1.118825 | 1.015081  | 3.506767  |
| 1  | -0.979480 | 0.758490  | 4.566942  |
| 1  | -0.600721 | 0.252441  | 2.911515  |
| 1  | -0.624477 | 1.975539  | 3.329039  |
| 6  | -3.790141 | 2.384568  | 4.244273  |
| 1  | -3.641505 | 2.092619  | 5.293871  |
| 1  | -3.361116 | 3.384567  | 4.115946  |
| 1  | -4.872908 | 2.455369  | 4.074396  |
| 6  | -3.691304 | -0.580973 | 3.781066  |
| 1  | -4.785704 | -0.625284 | 3.711883  |
| 1  | -3.276164 | -1.459578 | 3.278423  |
| 1  | -3.428498 | -0.657159 | 4.846511  |
| 14 | -3.028627 | 3.285445  | 0.830807  |
| 6  | -4.538567 | 4.348233  | 1.316247  |
| 1  | -4.745518 | 4.320941  | 2.391663  |
| 1  | -4.350490 | 5.394912  | 1.036591  |
| 1  | -5.446596 | 4.026867  | 0.789595  |
| 6  | -1.505598 | 4.002884  | 1.724122  |
| 1  | -0.590937 | 3.440431  | 1.503916  |
| 1  | -1.351200 | 5.031924  | 1.369461  |
| 1  | -1.624799 | 4.044927  | 2.812350  |
| 6  | -2.740896 | 3.634225  | -1.021006 |
| 1  | -3.643718 | 3.487533  | -1.621700 |
| 1  | -2.442875 | 4.687235  | -1.129656 |
| 1  | -1.939220 | 3.025126  | -1.456478 |

-----  
-----  
**Pb=Pb=Pb-Rea (singlet)**

-----

| Atomic<br>Number | Coordinates (Angstroms) |           |           |
|------------------|-------------------------|-----------|-----------|
|                  | X                       | Y         | Z         |
| 82               | -2.411545               | 0.080199  | -0.147221 |
| 82               | -0.023517               | -1.601713 | -0.162621 |
| 82               | 2.393586                | 0.019264  | 0.007563  |
| 6                | 4.376961                | -0.923341 | 0.677928  |
| 14               | 4.479210                | -2.847016 | 0.448503  |
| 6                | 4.544049                | -3.392646 | -1.375141 |
| 1                | 4.641254                | -4.487992 | -1.396239 |

-----

|    |          |           |           |
|----|----------|-----------|-----------|
| 1  | 3.633802 | -3.133721 | -1.927213 |
| 1  | 5.404566 | -2.980648 | -1.917603 |
| 6  | 6.090714 | -3.538410 | 1.214132  |
| 1  | 6.137310 | -3.429055 | 2.303980  |
| 1  | 6.169354 | -4.610897 | 0.985046  |
| 1  | 6.974600 | -3.044990 | 0.787017  |
| 6  | 3.004618 | -3.797078 | 1.195060  |
| 1  | 2.771531 | -3.516082 | 2.226339  |
| 1  | 2.097427 | -3.656455 | 0.589225  |
| 1  | 3.228505 | -4.873925 | 1.185308  |
| 14 | 4.715333 | -0.433773 | 2.535097  |
| 6  | 3.923976 | 1.209060  | 3.098253  |
| 1  | 4.336030 | 2.082053  | 2.583186  |
| 1  | 2.831336 | 1.219712  | 2.973667  |
| 1  | 4.123371 | 1.337341  | 4.172427  |
| 6  | 4.044946 | -1.699012 | 3.795497  |
| 1  | 4.467477 | -2.703736 | 3.686781  |
| 1  | 4.299453 | -1.340976 | 4.803524  |
| 1  | 2.950991 | -1.781425 | 3.748016  |
| 6  | 6.591527 | -0.241162 | 2.823499  |
| 1  | 6.780946 | -0.057354 | 3.890635  |
| 1  | 7.151169 | -1.138075 | 2.533355  |
| 1  | 7.003384 | 0.610381  | 2.265826  |
| 6  | 5.369939 | -0.189833 | -0.304843 |
| 1  | 5.390105 | -0.711575 | -1.271940 |
| 1  | 6.400363 | -0.234797 | 0.082120  |
| 6  | 5.024173 | 1.307275  | -0.576479 |
| 1  | 5.807822 | 1.723554  | -1.228927 |
| 1  | 5.104595 | 1.853396  | 0.374480  |
| 6  | 3.602149 | 1.546355  | -1.212885 |
| 14 | 3.580303 | 1.104505  | -3.116349 |
| 6  | 2.125478 | 1.897478  | -4.060417 |
| 1  | 1.155895 | 1.534885  | -3.694207 |
| 1  | 2.116921 | 2.992240  | -4.027894 |
| 1  | 2.205886 | 1.599831  | -5.115760 |
| 6  | 5.208674 | 1.703711  | -3.914228 |
| 1  | 5.158820 | 1.545083  | -5.000982 |
| 1  | 5.397126 | 2.769262  | -3.739290 |
| 1  | 6.074433 | 1.140228  | -3.541248 |
| 6  | 3.443116 | -0.744523 | -3.551486 |

|    |           |           |           |
|----|-----------|-----------|-----------|
| 1  | 4.320233  | -1.322113 | -3.245191 |
| 1  | 2.551463  | -1.219462 | -3.121675 |
| 1  | 3.360178  | -0.829337 | -4.645314 |
| 14 | 2.987323  | 3.363126  | -0.923925 |
| 6  | 1.107036  | 3.528242  | -1.156588 |
| 1  | 0.567125  | 2.868909  | -0.463531 |
| 1  | 0.794205  | 4.558703  | -0.936934 |
| 1  | 0.776822  | 3.287386  | -2.171269 |
| 6  | 3.343950  | 4.006498  | 0.833682  |
| 1  | 4.410685  | 3.988953  | 1.090843  |
| 1  | 3.016726  | 5.055338  | 0.881664  |
| 1  | 2.795548  | 3.458864  | 1.608691  |
| 6  | 3.871566  | 4.601713  | -2.079818 |
| 1  | 3.656580  | 4.433878  | -3.141457 |
| 1  | 3.546095  | 5.622676  | -1.833489 |
| 1  | 4.961211  | 4.562935  | -1.945721 |
| 6  | -4.434008 | -0.970971 | -0.493710 |
| 14 | -4.352306 | -2.892956 | -0.236919 |
| 6  | -3.924497 | -3.378382 | 1.555306  |
| 1  | -3.874835 | -4.475523 | 1.611664  |
| 1  | -2.947077 | -2.991022 | 1.868925  |
| 1  | -4.676238 | -3.047470 | 2.281853  |
| 6  | -6.051355 | -3.696213 | -0.589258 |
| 1  | -6.330991 | -3.644810 | -1.648749 |
| 1  | -6.020346 | -4.757877 | -0.305246 |
| 1  | -6.849691 | -3.220008 | -0.004428 |
| 6  | -3.068887 | -3.797012 | -1.319704 |
| 1  | -3.190831 | -3.615364 | -2.391157 |
| 1  | -2.036866 | -3.531374 | -1.049751 |
| 1  | -3.171142 | -4.879124 | -1.150996 |
| 14 | -5.168008 | -0.518358 | -2.237309 |
| 6  | -4.611585 | -1.694861 | -3.630353 |
| 1  | -4.983164 | -2.718858 | -3.506944 |
| 1  | -5.007903 | -1.313679 | -4.582346 |
| 1  | -3.518539 | -1.736444 | -3.724482 |
| 6  | -7.076318 | -0.545159 | -2.174273 |
| 1  | -7.476599 | -0.395514 | -3.187301 |
| 1  | -7.469282 | -1.495606 | -1.795786 |
| 1  | -7.473701 | 0.260804  | -1.542977 |
| 6  | -4.706336 | 1.217239  | -2.876688 |

|    |           |           |           |
|----|-----------|-----------|-----------|
| 1  | -5.116476 | 2.015977  | -2.248078 |
| 1  | -3.622131 | 1.368395  | -2.961193 |
| 1  | -5.130391 | 1.343124  | -3.883640 |
| 6  | -5.271611 | -0.305538 | 0.666600  |
| 1  | -5.092101 | -0.842314 | 1.604506  |
| 1  | -6.351016 | -0.401635 | 0.466772  |
| 6  | -4.975487 | 1.207256  | 0.916247  |
| 1  | -5.640923 | 1.549195  | 1.727054  |
| 1  | -5.293741 | 1.765637  | 0.022008  |
| 6  | -3.475253 | 1.555138  | 1.268098  |
| 14 | -3.065085 | 1.214144  | 3.141807  |
| 6  | -1.196931 | 1.137268  | 3.498312  |
| 1  | -1.045936 | 0.933494  | 4.568523  |
| 1  | -0.712676 | 0.327130  | 2.937184  |
| 1  | -0.676035 | 2.070805  | 3.260964  |
| 6  | -3.833709 | 2.570715  | 4.252067  |
| 1  | -3.675637 | 2.296794  | 5.305123  |
| 1  | -3.391038 | 3.561153  | 4.097651  |
| 1  | -4.917343 | 2.655492  | 4.093949  |
| 6  | -3.790898 | -0.405403 | 3.831847  |
| 1  | -4.886376 | -0.435755 | 3.774549  |
| 1  | -3.393425 | -1.297554 | 3.338501  |
| 1  | -3.517497 | -0.469231 | 4.895442  |
| 14 | -3.098676 | 3.409126  | 0.810393  |
| 6  | -4.598583 | 4.500693  | 1.263070  |
| 1  | -4.810787 | 4.492622  | 2.338248  |
| 1  | -4.399169 | 5.540727  | 0.967296  |
| 1  | -5.507178 | 4.177978  | 0.738044  |
| 6  | -1.569803 | 4.134832  | 1.688279  |
| 1  | -0.655412 | 3.573675  | 1.461618  |
| 1  | -1.421016 | 5.161614  | 1.324409  |
| 1  | -1.676951 | 4.184528  | 2.777432  |
| 6  | -2.783137 | 3.703685  | -1.046555 |
| 1  | -3.656363 | 3.480472  | -1.667461 |
| 1  | -2.541257 | 4.767246  | -1.190745 |
| 1  | -1.932457 | 3.124938  | -1.430711 |

-----  
-----  
C=C=C-Rea (triplet)



---

| Atomic<br>Number | Atomic<br>Type | Coordinates (Angstroms) |           |           |
|------------------|----------------|-------------------------|-----------|-----------|
|                  |                | X                       | Y         | Z         |
| 6                | 0              | -1.388487               | -0.012982 | 0.027372  |
| 6                | 0              | -0.063416               | -0.189311 | -0.162392 |
| 6                | 0              | 1.489277                | -0.002799 | -0.039256 |
| 6                | 0              | 2.430062                | -0.967620 | 0.778084  |
| 14               | 0              | 2.302605                | -2.951862 | 0.928779  |
| 6                | 0              | 2.677585                | -3.938644 | -0.665087 |
| 1                | 0              | 2.735691                | -4.994946 | -0.362252 |
| 1                | 0              | 1.926447                | -3.866730 | -1.451589 |
| 1                | 0              | 3.652487                | -3.675695 | -1.095140 |
| 6                | 0              | 3.745693                | -3.554710 | 2.037390  |
| 1                | 0              | 3.677642                | -3.248792 | 3.085352  |
| 1                | 0              | 3.723809                | -4.654062 | 2.017453  |
| 1                | 0              | 4.724450                | -3.243705 | 1.651594  |
| 6                | 0              | 0.743712                | -3.716079 | 1.687891  |
| 1                | 0              | -0.162263               | -3.464378 | 1.137181  |
| 1                | 0              | 0.856160                | -4.809663 | 1.653896  |
| 1                | 0              | 0.600422                | -3.430500 | 2.733836  |
| 14               | 0              | 2.731917                | -0.297652 | 2.658919  |
| 6                | 0              | 2.297905                | 1.532380  | 2.872395  |
| 1                | 0              | 3.112463                | 2.168719  | 2.514142  |
| 1                | 0              | 1.389630                | 1.815340  | 2.339386  |
| 1                | 0              | 2.154105                | 1.752945  | 3.939523  |
| 6                | 0              | 1.766448                | -1.230912 | 4.011993  |
| 1                | 0              | 2.088263                | -2.269743 | 4.137990  |
| 1                | 0              | 1.947167                | -0.713587 | 4.965482  |
| 1                | 0              | 0.687646                | -1.228486 | 3.837342  |
| 6                | 0              | 4.578689                | -0.377850 | 3.148351  |
| 1                | 0              | 4.665591                | 0.000700  | 4.177804  |
| 1                | 0              | 5.006651                | -1.384113 | 3.128141  |
| 1                | 0              | 5.195071                | 0.270960  | 2.512528  |
| 6                | 0              | 3.808940                | -0.793083 | 0.029854  |
| 1                | 0              | 3.852844                | -1.455581 | -0.844466 |
| 1                | 0              | 4.673021                | -1.031654 | 0.656396  |
| 6                | 0              | 3.808160                | 0.656198  | -0.441988 |
| 1                | 0              | 4.587272                | 0.861244  | -1.181680 |
| 1                | 0              | 3.998438                | 1.313240  | 0.416221  |

|    |   |           |           |           |
|----|---|-----------|-----------|-----------|
| 6  | 0 | 2.352786  | 0.893045  | -1.000061 |
| 14 | 0 | 2.347748  | 0.198094  | -2.898623 |
| 6  | 0 | 1.271351  | 1.173189  | -4.134148 |
| 1  | 0 | 0.218626  | 1.198472  | -3.842029 |
| 1  | 0 | 1.605098  | 2.202647  | -4.297554 |
| 1  | 0 | 1.332480  | 0.652140  | -5.100995 |
| 6  | 0 | 4.118913  | 0.172773  | -3.620872 |
| 1  | 0 | 4.052651  | -0.192282 | -4.656895 |
| 1  | 0 | 4.609185  | 1.150514  | -3.646886 |
| 1  | 0 | 4.769453  | -0.522720 | -3.074512 |
| 6  | 0 | 1.777645  | -1.600463 | -3.039211 |
| 1  | 0 | 2.586780  | -2.286855 | -2.775983 |
| 1  | 0 | 0.918875  | -1.820981 | -2.403674 |
| 1  | 0 | 1.497003  | -1.810035 | -4.080996 |
| 14 | 0 | 2.306382  | 2.874306  | -1.162479 |
| 6  | 0 | 0.653144  | 3.636538  | -1.679447 |
| 1  | 0 | -0.184965 | 3.211521  | -1.128582 |
| 1  | 0 | 0.668964  | 4.716423  | -1.475876 |
| 1  | 0 | 0.459110  | 3.500077  | -2.748172 |
| 6  | 0 | 2.966197  | 3.843834  | 0.348043  |
| 1  | 0 | 3.987772  | 3.540347  | 0.610663  |
| 1  | 0 | 3.015514  | 4.897486  | 0.034370  |
| 1  | 0 | 2.354076  | 3.799614  | 1.249283  |
| 6  | 0 | 3.584137  | 3.422173  | -2.480506 |
| 1  | 0 | 3.365125  | 3.094901  | -3.500507 |
| 1  | 0 | 3.586890  | 4.522163  | -2.484631 |
| 1  | 0 | 4.601371  | 3.097796  | -2.226868 |
| 6  | 0 | -2.511114 | -0.894034 | -0.783492 |
| 14 | 0 | -2.483897 | -2.865341 | -0.938724 |
| 6  | 0 | -2.919209 | -3.822912 | 0.656100  |
| 1  | 0 | -3.028806 | -4.877145 | 0.360858  |
| 1  | 0 | -2.171231 | -3.782375 | 1.448425  |
| 1  | 0 | -3.882490 | -3.507653 | 1.077536  |
| 6  | 0 | -3.933235 | -3.420224 | -2.063158 |
| 1  | 0 | -3.855532 | -3.102765 | -3.106984 |
| 1  | 0 | -3.942009 | -4.520170 | -2.057555 |
| 1  | 0 | -4.904399 | -3.087901 | -1.674710 |
| 6  | 0 | -0.924427 | -3.660799 | -1.657400 |
| 1  | 0 | -0.800342 | -3.450300 | -2.724194 |
| 1  | 0 | -0.022613 | -3.332699 | -1.140576 |

|    |   |           |           |           |
|----|---|-----------|-----------|-----------|
| 1  | 0 | -0.998643 | -4.751091 | -1.536493 |
| 14 | 0 | -2.774911 | -0.180337 | -2.625111 |
| 6  | 0 | -1.856730 | -1.146861 | -3.986903 |
| 1  | 0 | -2.197006 | -2.180746 | -4.102191 |
| 1  | 0 | -2.044860 | -0.631516 | -4.940138 |
| 1  | 0 | -0.774830 | -1.160595 | -3.830460 |
| 6  | 0 | -4.627121 | -0.170097 | -3.099344 |
| 1  | 0 | -4.707501 | 0.202511  | -4.131286 |
| 1  | 0 | -5.107292 | -1.152409 | -3.064006 |
| 1  | 0 | -5.202103 | 0.515648  | -2.462985 |
| 6  | 0 | -2.250195 | 1.625985  | -2.854831 |
| 1  | 0 | -3.038258 | 2.308086  | -2.521869 |
| 1  | 0 | -1.334455 | 1.870810  | -2.315399 |
| 1  | 0 | -2.081180 | 1.818391  | -3.923575 |
| 6  | 0 | -3.833468 | -0.617068 | 0.010178  |
| 1  | 0 | -3.897666 | -1.251126 | 0.903959  |
| 1  | 0 | -4.731077 | -0.814710 | -0.585113 |
| 6  | 0 | -3.723527 | 0.841082  | 0.434111  |
| 1  | 0 | -4.493149 | 1.126689  | 1.158269  |
| 1  | 0 | -3.861261 | 1.481788  | -0.446060 |
| 6  | 0 | -2.268870 | 0.992919  | 1.015451  |
| 14 | 0 | -2.333639 | 0.285465  | 2.879163  |
| 6  | 0 | -1.870950 | -1.542972 | 3.035794  |
| 1  | 0 | -2.731761 | -2.182376 | 2.821781  |
| 1  | 0 | -1.058015 | -1.830525 | 2.367793  |
| 1  | 0 | -1.559389 | -1.750055 | 4.068934  |
| 6  | 0 | -1.214155 | 1.196189  | 4.124502  |
| 1  | 0 | -1.311025 | 0.676329  | 5.088855  |
| 1  | 0 | -0.158651 | 1.167446  | 3.843737  |
| 1  | 0 | -1.494715 | 2.241239  | 4.288366  |
| 6  | 0 | -4.107528 | 0.372780  | 3.588311  |
| 1  | 0 | -4.515077 | 1.386391  | 3.648019  |
| 1  | 0 | -4.809558 | -0.244989 | 3.013443  |
| 1  | 0 | -4.079252 | -0.034325 | 4.609951  |
| 14 | 0 | -2.114886 | 2.961916  | 1.169085  |
| 6  | 0 | -3.373594 | 3.585861  | 2.474957  |
| 1  | 0 | -3.161150 | 3.278934  | 3.502976  |
| 1  | 0 | -3.339351 | 4.685074  | 2.449408  |
| 1  | 0 | -4.401953 | 3.289099  | 2.233379  |
| 6  | 0 | -0.441307 | 3.667238  | 1.701450  |

|   |   |           |          |           |
|---|---|-----------|----------|-----------|
| 1 | 0 | 0.386509  | 3.265749 | 1.118473  |
| 1 | 0 | -0.452812 | 4.755821 | 1.549077  |
| 1 | 0 | -0.234921 | 3.481411 | 2.760235  |
| 6 | 0 | -2.715864 | 3.960229 | -0.346087 |
| 1 | 0 | -3.767799 | 3.747679 | -0.576520 |
| 1 | 0 | -2.659740 | 5.019856 | -0.054972 |
| 1 | 0 | -2.134819 | 3.841551 | -1.260039 |

-----  
-----  
**Si=Si=Si-Rea (triplet)**  
-----

| Atomic<br>Number | Coordinates (Angstroms) |           |           |
|------------------|-------------------------|-----------|-----------|
|                  | X                       | Y         | Z         |
| 14               | 2.079618                | 0.029135  | 0.026159  |
| 14               | 0.014552                | -0.119854 | -0.955281 |
| 14               | -2.057993               | -0.047843 | 0.123116  |
| 6                | -3.410226               | 1.358928  | -0.123684 |
| 14               | -3.168502               | 2.636244  | -1.579290 |
| 6                | -3.194668               | 1.847775  | -3.309480 |
| 1                | -3.101141               | 2.663034  | -4.042056 |
| 1                | -2.360967               | 1.158110  | -3.474214 |
| 1                | -4.130469               | 1.320686  | -3.530977 |
| 6                | -4.629665               | 3.868961  | -1.604347 |
| 1                | -4.682184               | 4.509638  | -0.716806 |
| 1                | -4.523649               | 4.525848  | -2.479648 |
| 1                | -5.591348               | 3.347029  | -1.702284 |
| 6                | -1.536332               | 3.598395  | -1.493407 |
| 1                | -0.698204               | 2.914842  | -1.315233 |
| 1                | -1.356573               | 4.086475  | -2.461606 |
| 1                | -1.523111               | 4.373308  | -0.721741 |
| 14               | -3.710251               | 2.356213  | 1.554792  |
| 6                | -3.161735               | 1.465696  | 3.143469  |
| 1                | -3.763087               | 0.578641  | 3.360189  |
| 1                | -2.106435               | 1.165740  | 3.111509  |
| 1                | -3.283535               | 2.161539  | 3.986584  |
| 6                | -2.798519               | 4.028888  | 1.647718  |
| 1                | -3.106546               | 4.745848  | 0.879672  |
| 1                | -3.027435               | 4.474472  | 2.626720  |

|    |           |           |           |
|----|-----------|-----------|-----------|
| 1  | -1.709712 | 3.910266  | 1.589214  |
| 6  | -5.573122 | 2.712645  | 1.763926  |
| 1  | -5.715119 | 3.356276  | 2.643978  |
| 1  | -6.005046 | 3.229807  | 0.899301  |
| 1  | -6.150116 | 1.794278  | 1.934435  |
| 6  | -4.686114 | 0.474382  | -0.448933 |
| 1  | -4.706755 | 0.236353  | -1.521932 |
| 1  | -5.615627 | 1.015572  | -0.230739 |
| 6  | -4.640333 | -0.855045 | 0.342717  |
| 1  | -5.494091 | -1.489534 | 0.074126  |
| 1  | -4.750109 | -0.624738 | 1.412638  |
| 6  | -3.262515 | -1.594669 | 0.084103  |
| 14 | -3.367774 | -2.599189 | -1.608813 |
| 6  | -2.216454 | -4.115626 | -1.681681 |
| 1  | -1.159774 | -3.828623 | -1.648676 |
| 1  | -2.397851 | -4.851114 | -0.891807 |
| 1  | -2.387480 | -4.617141 | -2.645439 |
| 6  | -5.156234 | -3.225541 | -1.849267 |
| 1  | -5.184248 | -3.881759 | -2.731091 |
| 1  | -5.528879 | -3.800503 | -0.994098 |
| 1  | -5.855405 | -2.399589 | -2.035760 |
| 6  | -2.954125 | -1.636021 | -3.193084 |
| 1  | -3.681416 | -0.849657 | -3.414303 |
| 1  | -1.956685 | -1.182435 | -3.161355 |
| 1  | -2.969996 | -2.346429 | -4.032966 |
| 14 | -2.911262 | -2.844646 | 1.542753  |
| 6  | -1.112262 | -3.451322 | 1.560047  |
| 1  | -0.424493 | -2.598751 | 1.635908  |
| 1  | -0.949559 | -4.091958 | 2.438676  |
| 1  | -0.841109 | -4.025981 | 0.669901  |
| 6  | -3.203124 | -2.100083 | 3.270112  |
| 1  | -4.220577 | -1.714120 | 3.410868  |
| 1  | -3.056945 | -2.903119 | 4.007494  |
| 1  | -2.494193 | -1.300432 | 3.507787  |
| 6  | -4.104572 | -4.336069 | 1.478805  |
| 1  | -3.986186 | -4.966829 | 0.591064  |
| 1  | -3.927196 | -4.969584 | 2.360034  |
| 1  | -5.151395 | -4.005326 | 1.520838  |
| 6  | 3.444019  | -1.362963 | -0.019449 |
| 14 | 3.347097  | -2.564575 | -1.556174 |

|    |          |           |           |
|----|----------|-----------|-----------|
| 6  | 3.480719 | -1.628984 | -3.208898 |
| 1  | 3.280397 | -2.342133 | -4.021626 |
| 1  | 2.741897 | -0.822487 | -3.294094 |
| 1  | 4.480018 | -1.212574 | -3.381612 |
| 6  | 4.832146 | -3.763518 | -1.520724 |
| 1  | 4.794938 | -4.470842 | -0.683532 |
| 1  | 4.845915 | -4.351517 | -2.449574 |
| 1  | 5.784358 | -3.219276 | -1.462007 |
| 6  | 1.739167 | -3.563863 | -1.677528 |
| 1  | 1.560715 | -4.222046 | -0.823368 |
| 1  | 0.879879 | -2.889624 | -1.779090 |
| 1  | 1.778930 | -4.188866 | -2.581554 |
| 14 | 3.570841 | -2.402864 | 1.650038  |
| 6  | 2.680963 | -4.085396 | 1.618022  |
| 1  | 3.082757 | -4.771071 | 0.863317  |
| 1  | 2.828507 | -4.556807 | 2.600814  |
| 1  | 1.602173 | -3.990498 | 1.459783  |
| 6  | 5.403366 | -2.777605 | 2.033757  |
| 1  | 5.446027 | -3.457463 | 2.897008  |
| 1  | 5.920746 | -3.267396 | 1.200194  |
| 1  | 5.966396 | -1.874168 | 2.301817  |
| 6  | 2.893599 | -1.507213 | 3.185487  |
| 1  | 3.462661 | -0.599144 | 3.417996  |
| 1  | 1.836823 | -1.233089 | 3.081965  |
| 1  | 2.980587 | -2.180011 | 4.051036  |
| 6  | 4.749499 | -0.472727 | -0.154244 |
| 1  | 4.935907 | -0.253033 | -1.209903 |
| 1  | 5.636457 | -1.002163 | 0.213266  |
| 6  | 4.585424 | 0.870539  | 0.606765  |
| 1  | 5.456814 | 1.516392  | 0.423446  |
| 1  | 4.585653 | 0.664132  | 1.688112  |
| 6  | 3.236351 | 1.589632  | 0.177808  |
| 14 | 3.603837 | 2.655499  | -1.430940 |
| 6  | 2.051586 | 3.157334  | -2.397234 |
| 1  | 2.361133 | 3.657175  | -3.326523 |
| 1  | 1.446294 | 2.284885  | -2.674434 |
| 1  | 1.408907 | 3.850179  | -1.846261 |
| 6  | 4.580290 | 4.234217  | -0.967084 |
| 1  | 4.848108 | 4.755180  | -1.897790 |
| 1  | 4.024263 | 4.941073  | -0.343323 |

|    |          |          |           |
|----|----------|----------|-----------|
| 1  | 5.518069 | 3.989452 | -0.450284 |
| 6  | 4.763183 | 1.819073 | -2.690609 |
| 1  | 5.729351 | 1.533576 | -2.255905 |
| 1  | 4.322353 | 0.942854 | -3.172298 |
| 1  | 4.968882 | 2.558962 | -3.478452 |
| 14 | 2.612170 | 2.778059 | 1.612259  |
| 6  | 4.104310 | 3.555611 | 2.509309  |
| 1  | 4.703340 | 4.197926 | 1.854978  |
| 1  | 3.740438 | 4.173364 | 3.342968  |
| 1  | 4.768264 | 2.792042 | 2.934916  |
| 6  | 1.480554 | 4.180221 | 0.998219  |
| 1  | 0.592815 | 3.790624 | 0.488153  |
| 1  | 1.134555 | 4.751614 | 1.871787  |
| 1  | 1.975806 | 4.883871 | 0.321080  |
| 6  | 1.590519 | 1.889979 | 2.951515  |
| 1  | 2.167988 | 1.143714 | 3.504991  |
| 1  | 1.245119 | 2.643139 | 3.675204  |
| 1  | 0.703558 | 1.393638 | 2.537154  |

-----  
-----  
**Si=Ge=Si-Rea (triplet)**

-----

| Atomic<br>Number | Coordinates (Angstroms) |           |           |
|------------------|-------------------------|-----------|-----------|
|                  | X                       | Y         | Z         |
| 14               | 2.117912                | 0.052751  | 0.039503  |
| 32               | 0.013753                | -0.328051 | -1.074444 |
| 14               | -2.097994               | -0.042451 | 0.156343  |
| 6                | -3.477257               | 1.339791  | -0.097788 |
| 14               | -3.236822               | 2.597767  | -1.568505 |
| 6                | -3.267173               | 1.789888  | -3.290362 |
| 1                | -3.173484               | 2.597051  | -4.031897 |
| 1                | -2.436033               | 1.096049  | -3.451320 |
| 1                | -4.204383               | 1.262208  | -3.504162 |
| 6                | -4.690505               | 3.838356  | -1.614166 |
| 1                | -4.747509               | 4.485966  | -0.732120 |
| 1                | -4.575581               | 4.487629  | -2.493988 |
| 1                | -5.653316               | 3.318786  | -1.714979 |
| 6                | -1.595962               | 3.547618  | -1.494566 |

|    |           |           |           |
|----|-----------|-----------|-----------|
| 1  | -0.760056 | 2.858389  | -1.324897 |
| 1  | -1.420419 | 4.038690  | -2.462098 |
| 1  | -1.570973 | 4.319297  | -0.719754 |
| 14 | -3.783302 | 2.355186  | 1.566724  |
| 6  | -3.246451 | 1.482247  | 3.169030  |
| 1  | -3.845469 | 0.594012  | 3.387751  |
| 1  | -2.189356 | 1.187802  | 3.150577  |
| 1  | -3.380619 | 2.185140  | 4.004417  |
| 6  | -2.866898 | 4.026402  | 1.643993  |
| 1  | -3.170325 | 4.736260  | 0.867425  |
| 1  | -3.096409 | 4.483585  | 2.617451  |
| 1  | -1.778329 | 3.903056  | 1.589463  |
| 6  | -5.646758 | 2.716779  | 1.762233  |
| 1  | -5.792448 | 3.377104  | 2.629261  |
| 1  | -6.075648 | 3.216647  | 0.886089  |
| 1  | -6.223756 | 1.801389  | 1.948266  |
| 6  | -4.743444 | 0.436276  | -0.408567 |
| 1  | -4.765600 | 0.187075  | -1.478851 |
| 1  | -5.678966 | 0.968373  | -0.192360 |
| 6  | -4.678609 | -0.884746 | 0.396933  |
| 1  | -5.524772 | -1.532840 | 0.135403  |
| 1  | -4.791255 | -0.645119 | 1.464470  |
| 6  | -3.289710 | -1.605232 | 0.145316  |
| 14 | -3.387471 | -2.645671 | -1.525808 |
| 6  | -2.165266 | -4.106471 | -1.596171 |
| 1  | -1.122701 | -3.770223 | -1.555737 |
| 1  | -2.317388 | -4.849429 | -0.806902 |
| 1  | -2.306521 | -4.615502 | -2.560687 |
| 6  | -5.151068 | -3.354286 | -1.719263 |
| 1  | -5.164552 | -4.035986 | -2.581952 |
| 1  | -5.488569 | -3.918553 | -0.843028 |
| 1  | -5.885530 | -2.562697 | -1.919139 |
| 6  | -3.060816 | -1.702304 | -3.143326 |
| 1  | -3.809055 | -0.931032 | -3.347324 |
| 1  | -2.069564 | -1.235171 | -3.166548 |
| 1  | -3.102525 | -2.429221 | -3.968196 |
| 14 | -2.899734 | -2.828083 | 1.619593  |
| 6  | -1.086926 | -3.397623 | 1.639531  |
| 1  | -0.412763 | -2.533575 | 1.703143  |
| 1  | -0.912113 | -4.025096 | 2.525464  |



|    |           |           |           |
|----|-----------|-----------|-----------|
| 1  | -0.806612 | -3.978327 | 0.756093  |
| 6  | -3.203633 | -2.065558 | 3.336993  |
| 1  | -4.230085 | -1.703254 | 3.475502  |
| 1  | -3.034423 | -2.853131 | 4.085981  |
| 1  | -2.514708 | -1.244477 | 3.559350  |
| 6  | -4.049279 | -4.354752 | 1.586273  |
| 1  | -3.907818 | -5.001672 | 0.713541  |
| 1  | -3.855153 | -4.962406 | 2.482093  |
| 1  | -5.105899 | -4.055936 | 1.617770  |
| 6  | 3.532330  | -1.291033 | 0.030395  |
| 14 | 3.520256  | -2.522598 | -1.487910 |
| 6  | 3.652489  | -1.606323 | -3.152246 |
| 1  | 3.516734  | -2.341810 | -3.958486 |
| 1  | 2.873231  | -0.843379 | -3.274210 |
| 1  | 4.631678  | -1.136299 | -3.302009 |
| 6  | 5.053957  | -3.654988 | -1.394169 |
| 1  | 5.021019  | -4.347117 | -0.544116 |
| 1  | 5.114215  | -4.260076 | -2.310152 |
| 1  | 5.982666  | -3.073176 | -1.321966 |
| 6  | 1.971425  | -3.611479 | -1.639404 |
| 1  | 1.812229  | -4.277042 | -0.787142 |
| 1  | 1.072975  | -2.994554 | -1.764974 |
| 1  | 2.072449  | -4.236220 | -2.539098 |
| 14 | 3.635333  | -2.304531 | 1.719586  |
| 6  | 2.764300  | -3.996877 | 1.695579  |
| 1  | 3.199605  | -4.695133 | 0.971496  |
| 1  | 2.882021  | -4.443980 | 2.693671  |
| 1  | 1.690156  | -3.917159 | 1.497663  |
| 6  | 5.463615  | -2.644249 | 2.153241  |
| 1  | 5.495201  | -3.311063 | 3.027041  |
| 1  | 6.011057  | -3.135989 | 1.340486  |
| 1  | 6.003702  | -1.727260 | 2.422698  |
| 6  | 2.912331  | -1.396491 | 3.227031  |
| 1  | 3.451221  | -0.467540 | 3.448366  |
| 1  | 1.849107  | -1.157009 | 3.105311  |
| 1  | 3.007963  | -2.049456 | 4.106761  |
| 6  | 4.815644  | -0.366848 | -0.074894 |
| 1  | 5.023139  | -0.144854 | -1.126417 |
| 1  | 5.708224  | -0.869557 | 0.316624  |
| 6  | 4.594156  | 0.971756  | 0.679873  |

|    |          |          |           |
|----|----------|----------|-----------|
| 1  | 5.446145 | 1.646495 | 0.507737  |
| 1  | 4.586334 | 0.768255 | 1.761444  |
| 6  | 3.227562 | 1.643861 | 0.231185  |
| 14 | 3.585340 | 2.718644 | -1.374230 |
| 6  | 2.030151 | 3.184497 | -2.354817 |
| 1  | 2.336189 | 3.704426 | -3.274165 |
| 1  | 1.460930 | 2.294226 | -2.652486 |
| 1  | 1.354796 | 3.847900 | -1.807550 |
| 6  | 4.531402 | 4.311561 | -0.897644 |
| 1  | 4.800746 | 4.840385 | -1.823439 |
| 1  | 3.959520 | 5.007262 | -0.275816 |
| 1  | 5.467481 | 4.077972 | -0.372422 |
| 6  | 4.761668 | 1.902451 | -2.630488 |
| 1  | 5.735143 | 1.641219 | -2.197106 |
| 1  | 4.338379 | 1.013101 | -3.104007 |
| 1  | 4.948009 | 2.640987 | -3.424374 |
| 14 | 2.535500 | 2.817085 | 1.648471  |
| 6  | 3.987904 | 3.616315 | 2.590637  |
| 1  | 4.607303 | 4.251532 | 1.947527  |
| 1  | 3.589975 | 4.245675 | 3.399727  |
| 1  | 4.640688 | 2.864176 | 3.052899  |
| 6  | 1.401688 | 4.206325 | 1.007420  |
| 1  | 0.524665 | 3.804817 | 0.487855  |
| 1  | 1.037785 | 4.776843 | 1.874284  |
| 1  | 1.897976 | 4.913187 | 0.334617  |
| 6  | 1.473937 | 1.915405 | 2.947580  |
| 1  | 2.042490 | 1.197317 | 3.545509  |
| 1  | 1.066659 | 2.668959 | 3.638015  |
| 1  | 0.625695 | 1.385715 | 2.493855  |

-----  
-----  
**Ge=Si=Ge-Rea (triplet)**  
-----

| Atomic<br>Number | Atomic<br>Type | Coordinates (Angstroms) |           |           |
|------------------|----------------|-------------------------|-----------|-----------|
|                  |                | X                       | Y         | Z         |
| 32               | 0              | 2.071908                | 0.023871  | 0.007097  |
| 14               | 0              | 0.011585                | -0.111905 | -1.143197 |
| 32               | 0              | -2.044945               | -0.041576 | 0.141945  |

|    |   |           |           |           |
|----|---|-----------|-----------|-----------|
| 6  | 0 | -3.482501 | 1.393159  | -0.131921 |
| 14 | 0 | -3.214366 | 2.657191  | -1.589353 |
| 6  | 0 | -3.228149 | 1.860524  | -3.316462 |
| 1  | 0 | -3.126010 | 2.671136  | -4.053044 |
| 1  | 0 | -2.394851 | 1.167654  | -3.471263 |
| 1  | 0 | -4.163241 | 1.334086  | -3.542842 |
| 6  | 0 | -4.664142 | 3.902928  | -1.632259 |
| 1  | 0 | -4.721084 | 4.540451  | -0.742493 |
| 1  | 0 | -4.545317 | 4.561609  | -2.504439 |
| 1  | 0 | -5.627831 | 3.386336  | -1.740180 |
| 6  | 0 | -1.573227 | 3.607718  | -1.491801 |
| 1  | 0 | -0.737642 | 2.918327  | -1.320477 |
| 1  | 0 | -1.390281 | 4.104190  | -2.455323 |
| 1  | 0 | -1.555711 | 4.375413  | -0.712774 |
| 14 | 0 | -3.776210 | 2.374443  | 1.546274  |
| 6  | 0 | -3.228725 | 1.469894  | 3.129933  |
| 1  | 0 | -3.822217 | 0.574467  | 3.335041  |
| 1  | 0 | -2.169886 | 1.180656  | 3.101378  |
| 1  | 0 | -3.359915 | 2.155272  | 3.980201  |
| 6  | 0 | -2.847564 | 4.037506  | 1.648192  |
| 1  | 0 | -3.148953 | 4.761024  | 0.883469  |
| 1  | 0 | -3.068160 | 4.481592  | 2.629622  |
| 1  | 0 | -1.759980 | 3.907053  | 1.585556  |
| 6  | 0 | -5.636493 | 2.737156  | 1.756811  |
| 1  | 0 | -5.781044 | 3.376304  | 2.639448  |
| 1  | 0 | -6.063027 | 3.258796  | 0.892007  |
| 1  | 0 | -6.215343 | 1.818406  | 1.919253  |
| 6  | 0 | -4.728641 | 0.474038  | -0.460145 |
| 1  | 0 | -4.738616 | 0.235459  | -1.533198 |
| 1  | 0 | -5.672233 | 0.995862  | -0.249495 |
| 6  | 0 | -4.683948 | -0.861360 | 0.331032  |
| 1  | 0 | -5.549216 | -1.480898 | 0.060033  |
| 1  | 0 | -4.794738 | -0.630660 | 1.401045  |
| 6  | 0 | -3.325781 | -1.632443 | 0.079394  |
| 14 | 0 | -3.409682 | -2.620251 | -1.615740 |
| 6  | 0 | -2.231574 | -4.116493 | -1.690865 |
| 1  | 0 | -1.179937 | -3.810180 | -1.648236 |
| 1  | 0 | -2.405531 | -4.859552 | -0.906213 |
| 1  | 0 | -2.385826 | -4.615694 | -2.658524 |
| 6  | 0 | -5.190094 | -3.266615 | -1.860576 |

|    |   |           |           |           |
|----|---|-----------|-----------|-----------|
| 1  | 0 | -5.213135 | -3.921494 | -2.743295 |
| 1  | 0 | -5.556610 | -3.844907 | -1.004863 |
| 1  | 0 | -5.895942 | -2.445721 | -2.044727 |
| 6  | 0 | -3.005740 | -1.648426 | -3.198112 |
| 1  | 0 | -3.730635 | -0.857673 | -3.411489 |
| 1  | 0 | -2.005958 | -1.199327 | -3.170303 |
| 1  | 0 | -3.028055 | -2.354253 | -4.041788 |
| 14 | 0 | -2.960697 | -2.869121 | 1.540151  |
| 6  | 0 | -1.152009 | -3.455993 | 1.556054  |
| 1  | 0 | -0.470950 | -2.597375 | 1.629739  |
| 1  | 0 | -0.981120 | -4.093612 | 2.435273  |
| 1  | 0 | -0.875451 | -4.029094 | 0.666416  |
| 6  | 0 | -3.250672 | -2.111766 | 3.263014  |
| 1  | 0 | -4.269221 | -1.728435 | 3.403160  |
| 1  | 0 | -3.097785 | -2.906158 | 4.008169  |
| 1  | 0 | -2.544933 | -1.306016 | 3.491370  |
| 6  | 0 | -4.132657 | -4.376722 | 1.486677  |
| 1  | 0 | -4.003316 | -5.008244 | 0.600690  |
| 1  | 0 | -3.949566 | -5.004876 | 2.370363  |
| 1  | 0 | -5.183606 | -4.058549 | 1.523442  |
| 6  | 0 | 3.519201  | -1.392827 | -0.015106 |
| 14 | 0 | 3.413397  | -2.584850 | -1.556202 |
| 6  | 0 | 3.546895  | -1.640644 | -3.204260 |
| 1  | 0 | 3.358397  | -2.352149 | -4.021232 |
| 1  | 0 | 2.797887  | -0.843371 | -3.290762 |
| 1  | 0 | 4.541261  | -1.210066 | -3.370553 |
| 6  | 0 | 4.889806  | -3.793265 | -1.523681 |
| 1  | 0 | 4.846253  | -4.498517 | -0.684982 |
| 1  | 0 | 4.900919  | -4.382357 | -2.451633 |
| 1  | 0 | 5.844759  | -3.254100 | -1.463394 |
| 6  | 0 | 1.796761  | -3.572914 | -1.679787 |
| 1  | 0 | 1.604854  | -4.220789 | -0.820672 |
| 1  | 0 | 0.941451  | -2.895461 | -1.797878 |
| 1  | 0 | 1.839881  | -4.208120 | -2.576559 |
| 14 | 0 | 3.616924  | -2.417893 | 1.657022  |
| 6  | 0 | 2.701446  | -4.086750 | 1.624157  |
| 1  | 0 | 3.092524  | -4.779402 | 0.870184  |
| 1  | 0 | 2.837750  | -4.560712 | 2.607203  |
| 1  | 0 | 1.624020  | -3.973636 | 1.463018  |
| 6  | 0 | 5.442588  | -2.801761 | 2.056801  |

|    |   |          |           |           |
|----|---|----------|-----------|-----------|
| 1  | 0 | 5.479358 | -3.476827 | 2.923755  |
| 1  | 0 | 5.961080 | -3.297048 | 1.227089  |
| 1  | 0 | 6.007500 | -1.898475 | 2.321287  |
| 6  | 0 | 2.928699 | -1.509434 | 3.181945  |
| 1  | 0 | 3.497153 | -0.601532 | 3.416102  |
| 1  | 0 | 1.872228 | -1.235263 | 3.071053  |
| 1  | 0 | 3.006014 | -2.178049 | 4.051600  |
| 6  | 0 | 4.798931 | -0.469279 | -0.139504 |
| 1  | 0 | 4.987859 | -0.245907 | -1.194336 |
| 1  | 0 | 5.695493 | -0.980763 | 0.232692  |
| 6  | 0 | 4.625391 | 0.878421  | 0.621456  |
| 1  | 0 | 5.509006 | 1.511056  | 0.448296  |
| 1  | 0 | 4.614087 | 0.669643  | 1.702540  |
| 6  | 0 | 3.297703 | 1.626377  | 0.187203  |
| 14 | 0 | 3.651108 | 2.685327  | -1.423302 |
| 6  | 0 | 2.090150 | 3.179459  | -2.381578 |
| 1  | 0 | 2.391230 | 3.691189  | -3.307179 |
| 1  | 0 | 1.494941 | 2.302307  | -2.666073 |
| 1  | 0 | 1.438234 | 3.858598  | -1.824175 |
| 6  | 0 | 4.621589 | 4.267326  | -0.961437 |
| 1  | 0 | 4.890738 | 4.790919  | -1.890063 |
| 1  | 0 | 4.058305 | 4.970032  | -0.339015 |
| 1  | 0 | 5.557434 | 4.025887  | -0.439659 |
| 6  | 0 | 4.797689 | 1.837260  | -2.685332 |
| 1  | 0 | 5.764419 | 1.547041  | -2.255200 |
| 1  | 0 | 4.345741 | 0.959996  | -3.155511 |
| 1  | 0 | 5.002761 | 2.568214  | -3.481417 |
| 14 | 0 | 2.646378 | 2.795112  | 1.620174  |
| 6  | 0 | 4.121776 | 3.582116  | 2.534203  |
| 1  | 0 | 4.719538 | 4.230726  | 1.884655  |
| 1  | 0 | 3.748493 | 4.194133  | 3.367690  |
| 1  | 0 | 4.789241 | 2.821715  | 2.960030  |
| 6  | 0 | 1.500173 | 4.185853  | 1.005872  |
| 1  | 0 | 0.617268 | 3.789757  | 0.491328  |
| 1  | 0 | 1.145068 | 4.750261  | 1.880311  |
| 1  | 0 | 1.989996 | 4.897485  | 0.333113  |
| 6  | 0 | 1.619035 | 1.888218  | 2.945246  |
| 1  | 0 | 2.193404 | 1.137496  | 3.495858  |
| 1  | 0 | 1.268922 | 2.633877  | 3.674443  |
| 1  | 0 | 0.730983 | 1.397061  | 2.525426  |

Ge=Ge=Ge-Rea (triplet)

| Atomic<br>Number | Coordinates (Angstroms) |           |           |
|------------------|-------------------------|-----------|-----------|
|                  | X                       | Y         | Z         |
| 32               | 2.112175                | 0.035796  | 0.034495  |
| 32               | 0.005886                | -0.220008 | -1.241845 |
| 32               | -2.083690               | -0.030634 | 0.186736  |
| 6                | -3.537721               | 1.396194  | -0.087414 |
| 14               | -3.259958               | 2.650103  | -1.551043 |
| 6                | -3.270432               | 1.841429  | -3.273239 |
| 1                | -3.160761               | 2.645809  | -4.015558 |
| 1                | -2.440239               | 1.142792  | -3.420177 |
| 1                | -4.206995               | 1.317714  | -3.499741 |
| 6                | -4.701113               | 3.905164  | -1.612656 |
| 1                | -4.763229               | 4.546314  | -0.725860 |
| 1                | -4.570886               | 4.559856  | -2.486286 |
| 1                | -5.666497               | 3.393098  | -1.727455 |
| 6                | -1.611235               | 3.590431  | -1.455255 |
| 1                | -0.777790               | 2.896877  | -1.286737 |
| 1                | -1.428147               | 4.088555  | -2.418049 |
| 1                | -1.587704               | 4.356367  | -0.674525 |
| 14               | -3.831107               | 2.387365  | 1.583442  |
| 6                | -3.285875               | 1.490804  | 3.172398  |
| 1                | -3.876772               | 0.594058  | 3.379028  |
| 1                | -2.225829               | 1.205324  | 3.147451  |
| 1                | -3.421479               | 2.178611  | 4.020012  |
| 6                | -2.898697               | 4.049222  | 1.677116  |
| 1                | -3.197397               | 4.769388  | 0.908100  |
| 1                | -3.119066               | 4.499392  | 2.655827  |
| 1                | -1.811321               | 3.915519  | 1.616286  |
| 6                | -5.690869               | 2.756283  | 1.789854  |
| 1                | -5.835511               | 3.400501  | 2.668823  |
| 1                | -6.114339               | 3.274435  | 0.921342  |
| 1                | -6.272487               | 1.839950  | 1.955919  |
| 6                | -4.780461               | 0.470923  | -0.409989 |
| 1                | -4.790195               | 0.227084  | -1.481924 |

|    |           |           |           |
|----|-----------|-----------|-----------|
| 1  | -5.726699 | 0.989441  | -0.201666 |
| 6  | -4.730781 | -0.861199 | 0.387439  |
| 1  | -5.595032 | -1.483995 | 0.119149  |
| 1  | -4.842757 | -0.626101 | 1.456415  |
| 6  | -3.369484 | -1.627622 | 0.140318  |
| 14 | -3.452203 | -2.633564 | -1.544041 |
| 6  | -2.239484 | -4.102829 | -1.618405 |
| 1  | -1.194899 | -3.772052 | -1.570207 |
| 1  | -2.399967 | -4.850410 | -0.834929 |
| 1  | -2.377824 | -4.604837 | -2.587067 |
| 6  | -5.221125 | -3.318846 | -1.767342 |
| 1  | -5.236856 | -3.987303 | -2.640110 |
| 1  | -5.572496 | -3.890332 | -0.901012 |
| 1  | -5.942760 | -2.513683 | -1.960256 |
| 6  | -3.093765 | -1.675375 | -3.147487 |
| 1  | -3.822376 | -0.884594 | -3.348191 |
| 1  | -2.092049 | -1.229698 | -3.158065 |
| 1  | -3.143168 | -2.390774 | -3.982048 |
| 14 | -2.987004 | -2.853661 | 1.607679  |
| 6  | -1.171912 | -3.424357 | 1.625284  |
| 1  | -0.496115 | -2.560568 | 1.683595  |
| 1  | -0.994077 | -4.048268 | 2.513059  |
| 1  | -0.893632 | -4.008469 | 0.743260  |
| 6  | -3.281989 | -2.088617 | 3.326520  |
| 1  | -4.303708 | -1.713146 | 3.465246  |
| 1  | -3.121388 | -2.876985 | 4.076428  |
| 1  | -2.583048 | -1.275314 | 3.549065  |
| 6  | -4.137124 | -4.379180 | 1.569947  |
| 1  | -3.997091 | -5.018434 | 0.690997  |
| 1  | -3.944076 | -4.994902 | 2.460372  |
| 1  | -5.193102 | -4.077796 | 1.603130  |
| 6  | 3.582712  | -1.364979 | 0.043793  |
| 14 | 3.503863  | -2.580190 | -1.482917 |
| 6  | 3.636798  | -1.652489 | -3.141241 |
| 1  | 3.471866  | -2.376701 | -3.952232 |
| 1  | 2.872752  | -0.871469 | -3.246328 |
| 1  | 4.623629  | -1.202476 | -3.301372 |
| 6  | 4.992079  | -3.772906 | -1.425700 |
| 1  | 4.945317  | -4.469119 | -0.579496 |
| 1  | 5.014368  | -4.372693 | -2.346703 |

|    |          |           |           |
|----|----------|-----------|-----------|
| 1  | 5.942847 | -3.226962 | -1.363341 |
| 6  | 1.907038 | -3.601930 | -1.613528 |
| 1  | 1.715800 | -4.241139 | -0.747973 |
| 1  | 1.036729 | -2.948254 | -1.754594 |
| 1  | 1.978611 | -4.249502 | -2.499824 |
| 14 | 3.663051 | -2.373721 | 1.727907  |
| 6  | 2.739432 | -4.038568 | 1.708256  |
| 1  | 3.135733 | -4.744764 | 0.969759  |
| 1  | 2.861705 | -4.498214 | 2.700004  |
| 1  | 1.664145 | -3.922535 | 1.532801  |
| 6  | 5.484154 | -2.759306 | 2.147403  |
| 1  | 5.511303 | -3.425508 | 3.021605  |
| 1  | 6.008621 | -3.264327 | 1.327489  |
| 1  | 6.049304 | -1.854957 | 2.407669  |
| 6  | 2.966285 | -1.449454 | 3.239565  |
| 1  | 3.530626 | -0.537271 | 3.466371  |
| 1  | 1.909070 | -1.181140 | 3.122206  |
| 1  | 3.042515 | -2.108745 | 4.116451  |
| 6  | 4.856828 | -0.433318 | -0.070937 |
| 1  | 5.057360 | -0.215047 | -1.124996 |
| 1  | 5.753910 | -0.934102 | 0.315300  |
| 6  | 4.663159 | 0.917337  | 0.680812  |
| 1  | 5.541549 | 1.558094  | 0.509046  |
| 1  | 4.648311 | 0.714807  | 1.762926  |
| 6  | 3.329629 | 1.648862  | 0.237510  |
| 14 | 3.675237 | 2.707343  | -1.375657 |
| 6  | 2.108902 | 3.187999  | -2.333828 |
| 1  | 2.405176 | 3.709348  | -3.255641 |
| 1  | 1.526446 | 2.304652  | -2.626141 |
| 1  | 1.445531 | 3.854215  | -1.774444 |
| 6  | 4.636175 | 4.297013  | -0.920820 |
| 1  | 4.904457 | 4.817422  | -1.851536 |
| 1  | 4.067229 | 4.999628  | -0.303349 |
| 1  | 5.572094 | 4.063909  | -0.395448 |
| 6  | 4.820316 | 1.857957  | -2.637850 |
| 1  | 5.790946 | 1.576421  | -2.210866 |
| 1  | 4.370368 | 0.973817  | -3.097255 |
| 1  | 5.016611 | 2.582719  | -3.441744 |
| 14 | 2.652967 | 2.818174  | 1.659112  |
| 6  | 4.112525 | 3.623079  | 2.583319  |



|   |          |          |          |
|---|----------|----------|----------|
| 1 | 4.708282 | 4.275478 | 1.935468 |
| 1 | 3.726489 | 4.234765 | 3.411263 |
| 1 | 4.785107 | 2.871806 | 3.017105 |
| 6 | 1.500922 | 4.198528 | 1.030623 |
| 1 | 0.621087 | 3.794388 | 0.516632 |
| 1 | 1.140308 | 4.765589 | 1.901153 |
| 1 | 1.988226 | 4.909704 | 0.355605 |
| 6 | 1.614760 | 1.909751 | 2.974390 |
| 1 | 2.188574 | 1.174068 | 3.545104 |
| 1 | 1.238971 | 2.658025 | 3.687892 |
| 1 | 0.742183 | 1.401818 | 2.541559 |

-----  
-----  
**Sn=Sn=Sn-Rea (triplet)**  
-----

| Atomic<br>Number | Coordinates (Angstroms) |           |           |
|------------------|-------------------------|-----------|-----------|
|                  | X                       | Y         | Z         |
| 50               | 2.363934                | 0.003973  | -0.092944 |
| 50               | 0.025032                | -0.719747 | -1.600230 |
| 50               | -2.246063               | -0.042629 | 0.226828  |
| 6                | -3.885446               | 1.437230  | -0.178343 |
| 14               | -3.598122               | 2.547324  | -1.744212 |
| 6                | -3.724194               | 1.589040  | -3.384882 |
| 1                | -3.544177               | 2.299302  | -4.205231 |
| 1                | -2.978441               | 0.791589  | -3.471967 |
| 1                | -4.716005               | 1.149051  | -3.547800 |
| 6                | -4.933312               | 3.909638  | -1.889513 |
| 1                | -4.912505               | 4.630613  | -1.064074 |
| 1                | -4.778048               | 4.469759  | -2.823043 |
| 1                | -5.941117               | 3.474184  | -1.931383 |
| 6                | -1.884151               | 3.375807  | -1.776367 |
| 1                | -1.086435               | 2.624152  | -1.851509 |
| 1                | -1.810576               | 4.019361  | -2.664953 |
| 1                | -1.685922               | 3.997354  | -0.898033 |
| 14               | -4.207598               | 2.553649  | 1.391456  |
| 6                | -3.830633               | 1.747448  | 3.077752  |
| 1                | -4.445543               | 0.864299  | 3.277295  |
| 1                | -2.775790               | 1.459322  | 3.179960  |

|    |           |           |           |
|----|-----------|-----------|-----------|
| 1  | -4.046472 | 2.483991  | 3.866077  |
| 6  | -3.161246 | 4.148616  | 1.413036  |
| 1  | -3.367566 | 4.824864  | 0.575989  |
| 1  | -3.387052 | 4.693502  | 2.341162  |
| 1  | -2.085807 | 3.929351  | 1.415935  |
| 6  | -6.049657 | 3.051912  | 1.473117  |
| 1  | -6.190604 | 3.785417  | 2.280089  |
| 1  | -6.407631 | 3.505484  | 0.541988  |
| 1  | -6.691990 | 2.190192  | 1.699065  |
| 6  | -5.094050 | 0.440573  | -0.406309 |
| 1  | -5.104037 | 0.101713  | -1.451037 |
| 1  | -6.054135 | 0.955447  | -0.246151 |
| 6  | -5.054769 | -0.823768 | 0.507020  |
| 1  | -5.960250 | -1.419490 | 0.314635  |
| 1  | -5.131531 | -0.492447 | 1.552667  |
| 6  | -3.751276 | -1.699951 | 0.311121  |
| 14 | -3.924132 | -2.817360 | -1.277012 |
| 6  | -2.686787 | -4.268631 | -1.322792 |
| 1  | -1.644806 | -3.922732 | -1.321709 |
| 1  | -2.814008 | -4.975823 | -0.495870 |
| 1  | -2.844204 | -4.824082 | -2.258602 |
| 6  | -5.687652 | -3.553208 | -1.352752 |
| 1  | -5.742317 | -4.271256 | -2.183749 |
| 1  | -5.968295 | -4.080980 | -0.434749 |
| 1  | -6.441731 | -2.777628 | -1.542560 |
| 6  | -3.696368 | -1.963916 | -2.965788 |
| 1  | -4.433686 | -1.176734 | -3.152016 |
| 1  | -2.696469 | -1.532192 | -3.097585 |
| 1  | -3.825647 | -2.727660 | -3.747140 |
| 14 | -3.393616 | -2.806683 | 1.869524  |
| 6  | -1.596538 | -3.442411 | 1.921541  |
| 1  | -0.879068 | -2.610996 | 1.956135  |
| 1  | -1.449783 | -4.043388 | 2.830855  |
| 1  | -1.339339 | -4.069868 | 1.062336  |
| 6  | -3.654415 | -1.871004 | 3.509788  |
| 1  | -4.688573 | -1.528212 | 3.643405  |
| 1  | -3.431348 | -2.560988 | 4.336739  |
| 1  | -2.991770 | -1.004745 | 3.616656  |
| 6  | -4.563775 | -4.313037 | 1.991219  |
| 1  | -4.428294 | -5.032065 | 1.175332  |

|    |           |           |           |
|----|-----------|-----------|-----------|
| 1  | -4.372316 | -4.842436 | 2.935836  |
| 1  | -5.616893 | -4.000984 | 1.996056  |
| 6  | 4.188272  | -1.210817 | 0.144828  |
| 14 | 4.583377  | -2.284157 | -1.431724 |
| 6  | 4.918531  | -1.189357 | -2.956633 |
| 1  | 5.041680  | -1.844497 | -3.831011 |
| 1  | 4.086261  | -0.508221 | -3.180425 |
| 1  | 5.835662  | -0.595458 | -2.863148 |
| 6  | 6.167325  | -3.318214 | -1.173865 |
| 1  | 6.036212  | -4.111357 | -0.427250 |
| 1  | 6.445712  | -3.799788 | -2.122113 |
| 1  | 7.013709  | -2.693004 | -0.859317 |
| 6  | 3.185720  | -3.462145 | -1.960208 |
| 1  | 2.922023  | -4.202551 | -1.199500 |
| 1  | 2.270365  | -2.917622 | -2.228067 |
| 1  | 3.512791  | -4.008773 | -2.856934 |
| 14 | 4.120988  | -2.318865 | 1.750741  |
| 6  | 3.288056  | -4.008858 | 1.476706  |
| 1  | 3.855035  | -4.664259 | 0.805542  |
| 1  | 3.214872  | -4.517069 | 2.448784  |
| 1  | 2.268854  | -3.910826 | 1.080531  |
| 6  | 5.887910  | -2.625500 | 2.404253  |
| 1  | 5.846615  | -3.363407 | 3.218404  |
| 1  | 6.564380  | -3.013697 | 1.635001  |
| 1  | 6.333501  | -1.710615 | 2.817004  |
| 6  | 3.175320  | -1.544357 | 3.212614  |
| 1  | 3.635758  | -0.613684 | 3.564448  |
| 1  | 2.120091  | -1.343526 | 2.987247  |
| 1  | 3.196384  | -2.255083 | 4.051804  |
| 6  | 5.265682  | -0.061880 | 0.312900  |
| 1  | 5.604151  | 0.268747  | -0.674984 |
| 1  | 6.160117  | -0.442001 | 0.828501  |
| 6  | 4.756972  | 1.195576  | 1.087683  |
| 1  | 5.573071  | 1.935860  | 1.113666  |
| 1  | 4.586398  | 0.908867  | 2.137203  |
| 6  | 3.445952  | 1.841149  | 0.478734  |
| 14 | 3.858578  | 3.027383  | -1.016441 |
| 6  | 2.390808  | 3.230081  | -2.209519 |
| 1  | 2.664427  | 3.938443  | -3.004641 |
| 1  | 2.126761  | 2.280040  | -2.693941 |

|    |          |          |           |
|----|----------|----------|-----------|
| 1  | 1.489419 | 3.613755 | -1.719258 |
| 6  | 4.396437 | 4.761365 | -0.415946 |
| 1  | 4.674172 | 5.360238 | -1.295345 |
| 1  | 3.614272 | 5.307888 | 0.121064  |
| 1  | 5.280015 | 4.706194 | 0.233983  |
| 6  | 5.342589 | 2.454264 | -2.064675 |
| 1  | 6.247524 | 2.303773 | -1.462025 |
| 1  | 5.146570 | 1.538627 | -2.629997 |
| 1  | 5.564851 | 3.247986 | -2.792954 |
| 14 | 2.447836 | 2.807731 | 1.844328  |
| 6  | 3.626222 | 3.839409 | 2.931709  |
| 1  | 4.133766 | 4.633278 | 2.373799  |
| 1  | 3.053757 | 4.311992 | 3.742725  |
| 1  | 4.395021 | 3.209817 | 3.398959  |
| 6  | 1.107864 | 3.939611 | 1.105244  |
| 1  | 0.389400 | 3.369606 | 0.502161  |
| 1  | 0.548891 | 4.405787 | 1.929026  |
| 1  | 1.505051 | 4.746441 | 0.480406  |
| 6  | 1.498952 | 1.675312 | 3.051052  |
| 1  | 2.152105 | 1.028331 | 3.645124  |
| 1  | 0.949275 | 2.316968 | 3.755770  |
| 1  | 0.753670 | 1.042536 | 2.548387  |

Pb=Pb=Pb-Rea (triplet)

| Atomic<br>Number | Coordinates (Angstroms) |           |           |
|------------------|-------------------------|-----------|-----------|
|                  | X                       | Y         | Z         |
| 82               | 2.403662                | 0.041423  | -0.073449 |
| 82               | 0.022549                | -0.856122 | -1.644724 |
| 82               | -2.264120               | 0.029485  | 0.332995  |
| 6                | -3.994619               | 1.512708  | -0.173361 |
| 14               | -3.663882               | 2.555294  | -1.770576 |
| 6                | -3.772946               | 1.536988  | -3.376900 |
| 1                | -3.572101               | 2.212268  | -4.221509 |
| 1                | -3.034493               | 0.728865  | -3.420115 |
| 1                | -4.766487               | 1.100071  | -3.538306 |
| 6                | -4.973620               | 3.932657  | -1.997390 |

|    |           |           |           |
|----|-----------|-----------|-----------|
| 1  | -4.958530 | 4.682047  | -1.197539 |
| 1  | -4.792056 | 4.456559  | -2.947072 |
| 1  | -5.986502 | 3.509451  | -2.042701 |
| 6  | -1.935560 | 3.357678  | -1.802306 |
| 1  | -1.150391 | 2.591168  | -1.865383 |
| 1  | -1.844809 | 3.992870  | -2.695348 |
| 1  | -1.732195 | 3.982808  | -0.927379 |
| 14 | -4.318599 | 2.669262  | 1.355516  |
| 6  | -3.955202 | 1.906114  | 3.066582  |
| 1  | -4.582654 | 1.037384  | 3.289462  |
| 1  | -2.904043 | 1.606487  | 3.181232  |
| 1  | -4.160791 | 2.666944  | 3.834170  |
| 6  | -3.254450 | 4.253479  | 1.340751  |
| 1  | -3.437302 | 4.901342  | 0.476279  |
| 1  | -3.488257 | 4.834831  | 2.244405  |
| 1  | -2.181582 | 4.021797  | 1.369781  |
| 6  | -6.156266 | 3.187246  | 1.411972  |
| 1  | -6.305763 | 3.921742  | 2.216438  |
| 1  | -6.491299 | 3.644046  | 0.473478  |
| 1  | -6.810649 | 2.330886  | 1.623778  |
| 6  | -5.173109 | 0.485701  | -0.380958 |
| 1  | -5.155134 | 0.103619  | -1.410683 |
| 1  | -6.147380 | 0.988990  | -0.264536 |
| 6  | -5.152214 | -0.743436 | 0.583299  |
| 1  | -6.068249 | -1.329496 | 0.402312  |
| 1  | -5.240357 | -0.368475 | 1.613374  |
| 6  | -3.869914 | -1.653023 | 0.447135  |
| 14 | -4.004588 | -2.815413 | -1.101672 |
| 6  | -2.758677 | -4.261262 | -1.073250 |
| 1  | -1.717926 | -3.910357 | -1.058161 |
| 1  | -2.900203 | -4.939868 | -0.224756 |
| 1  | -2.890899 | -4.850174 | -1.992339 |
| 6  | -5.761933 | -3.564362 | -1.197868 |
| 1  | -5.800861 | -4.299716 | -2.014415 |
| 1  | -6.052866 | -4.073722 | -0.272391 |
| 1  | -6.516588 | -2.796024 | -1.413491 |
| 6  | -3.740915 | -2.020541 | -2.816390 |
| 1  | -4.478045 | -1.245067 | -3.047492 |
| 1  | -2.741976 | -1.581912 | -2.940501 |
| 1  | -3.843867 | -2.811094 | -3.574587 |

|    |           |           |           |
|----|-----------|-----------|-----------|
| 14 | -3.538878 | -2.691883 | 2.050643  |
| 6  | -1.740231 | -3.318030 | 2.170187  |
| 1  | -1.035223 | -2.480600 | 2.270522  |
| 1  | -1.632353 | -3.946547 | 3.066550  |
| 1  | -1.431802 | -3.914822 | 1.305479  |
| 6  | -3.826457 | -1.692137 | 3.648781  |
| 1  | -4.862177 | -1.343884 | 3.752571  |
| 1  | -3.615515 | -2.347963 | 4.506105  |
| 1  | -3.165389 | -0.821570 | 3.731921  |
| 6  | -4.701335 | -4.201624 | 2.213539  |
| 1  | -4.543108 | -4.951347 | 1.429598  |
| 1  | -4.526240 | -4.691585 | 3.182288  |
| 1  | -5.756301 | -3.897346 | 2.182351  |
| 6  | 4.303550  | -1.151015 | 0.344183  |
| 14 | 4.752753  | -2.261358 | -1.186195 |
| 6  | 5.119354  | -1.204712 | -2.731485 |
| 1  | 5.277105  | -1.880352 | -3.584400 |
| 1  | 4.284939  | -0.541368 | -2.998757 |
| 1  | 6.023931  | -0.593683 | -2.627487 |
| 6  | 6.330085  | -3.285668 | -0.858447 |
| 1  | 6.179040  | -4.049836 | -0.085780 |
| 1  | 6.630755  | -3.802654 | -1.780857 |
| 1  | 7.168924  | -2.649613 | -0.545828 |
| 6  | 3.376325  | -3.462870 | -1.725837 |
| 1  | 3.095678  | -4.186259 | -0.954681 |
| 1  | 2.463692  | -2.934026 | -2.033950 |
| 1  | 3.731905  | -4.029666 | -2.598899 |
| 14 | 4.167048  | -2.198477 | 1.978334  |
| 6  | 3.362274  | -3.904769 | 1.719888  |
| 1  | 3.969687  | -4.577547 | 1.103132  |
| 1  | 3.238274  | -4.380626 | 2.703128  |
| 1  | 2.366288  | -3.828023 | 1.264254  |
| 6  | 5.905209  | -2.467727 | 2.720415  |
| 1  | 5.836640  | -3.176991 | 3.557730  |
| 1  | 6.614915  | -2.876965 | 1.992451  |
| 1  | 6.327669  | -1.535094 | 3.117376  |
| 6  | 3.143211  | -1.389455 | 3.367821  |
| 1  | 3.576315  | -0.442931 | 3.711251  |
| 1  | 2.097333  | -1.208681 | 3.086548  |
| 1  | 3.129978  | -2.072988 | 4.229339  |

|    |          |           |           |
|----|----------|-----------|-----------|
| 6  | 5.334107 | 0.033767  | 0.511302  |
| 1  | 5.702381 | 0.343352  | -0.473094 |
| 1  | 6.220148 | -0.302149 | 1.072190  |
| 6  | 4.775331 | 1.305971  | 1.230861  |
| 1  | 5.590610 | 2.047245  | 1.279296  |
| 1  | 4.559822 | 1.039398  | 2.277334  |
| 6  | 3.498255 | 1.942685  | 0.558018  |
| 14 | 3.941814 | 3.083007  | -0.958891 |
| 6  | 2.500036 | 3.233474  | -2.193688 |
| 1  | 2.782218 | 3.925257  | -3.000282 |
| 1  | 2.258400 | 2.268973  | -2.661809 |
| 1  | 1.582273 | 3.616990  | -1.734496 |
| 6  | 4.442690 | 4.841953  | -0.400781 |
| 1  | 4.740015 | 5.417783  | -1.289116 |
| 1  | 3.636703 | 5.393319  | 0.095000  |
| 1  | 5.305632 | 4.817644  | 0.278127  |
| 6  | 5.454028 | 2.487258  | -1.952886 |
| 1  | 6.345006 | 2.362418  | -1.324225 |
| 1  | 5.276775 | 1.551116  | -2.490577 |
| 1  | 5.689193 | 3.256359  | -2.703072 |
| 14 | 2.426947 | 2.916169  | 1.856154  |
| 6  | 3.543497 | 3.995428  | 2.963417  |
| 1  | 4.063382 | 4.778994  | 2.401892  |
| 1  | 2.933606 | 4.484799  | 3.736360  |
| 1  | 4.301013 | 3.390205  | 3.478997  |
| 6  | 1.099630 | 4.010539  | 1.040156  |
| 1  | 0.418539 | 3.421562  | 0.411909  |
| 1  | 0.495388 | 4.477959  | 1.830807  |
| 1  | 1.511475 | 4.816854  | 0.423632  |
| 6  | 1.452152 | 1.794930  | 3.053498  |
| 1  | 2.094536 | 1.182124  | 3.693577  |
| 1  | 0.858003 | 2.442867  | 3.715135  |
| 1  | 0.742458 | 1.129136  | 2.541085  |

-----  
-----  
  
C=C=C (TS)  
  
-----

| Atomic<br>Number | Coordinates (Angstroms) |   |   |
|------------------|-------------------------|---|---|
|                  | X                       | Y | Z |

|    |           |           |           |
|----|-----------|-----------|-----------|
| 6  | 0.858584  | 0.266600  | -1.735170 |
| 6  | -0.237746 | -0.573017 | -2.185387 |
| 6  | -1.399655 | 0.193836  | 0.089164  |
| 6  | -0.117840 | -0.158475 | 0.433984  |
| 6  | 1.265503  | -0.128945 | -0.186473 |
| 6  | 2.511015  | 0.850589  | 0.466205  |
| 14 | 2.422979  | 1.844743  | 2.198039  |
| 6  | 1.824084  | 0.852761  | 3.708239  |
| 1  | 1.772468  | 1.557519  | 4.551366  |
| 1  | 0.841139  | 0.393374  | 3.591903  |
| 1  | 2.535925  | 0.068544  | 3.987559  |
| 6  | 4.217562  | 2.294914  | 2.712324  |
| 1  | 4.717105  | 2.980014  | 2.018707  |
| 1  | 4.149769  | 2.812110  | 3.681414  |
| 1  | 4.862971  | 1.420557  | 2.856547  |
| 6  | 1.546676  | 3.530656  | 2.285916  |
| 1  | 0.666671  | 3.616065  | 1.654987  |
| 1  | 1.223991  | 3.690521  | 3.323159  |
| 1  | 2.232968  | 4.342311  | 2.025348  |
| 14 | 3.449751  | 2.106700  | -0.837877 |
| 6  | 3.236463  | 1.938100  | -2.734839 |
| 1  | 3.479619  | 0.940651  | -3.117368 |
| 1  | 2.247767  | 2.219264  | -3.105690 |
| 1  | 3.965378  | 2.635053  | -3.173458 |
| 6  | 3.154822  | 3.969911  | -0.524036 |
| 1  | 3.754447  | 4.339486  | 0.316050  |
| 1  | 3.482526  | 4.507712  | -1.424832 |
| 1  | 2.114090  | 4.245680  | -0.337476 |
| 6  | 5.352000  | 1.910294  | -0.691025 |
| 1  | 5.802467  | 2.670105  | -1.346579 |
| 1  | 5.750187  | 2.068726  | 0.316108  |
| 1  | 5.698189  | 0.930500  | -1.044758 |
| 6  | 3.637627  | -0.194531 | 0.796995  |
| 1  | 3.433642  | -0.704181 | 1.748148  |
| 1  | 4.625662  | 0.255593  | 0.895261  |
| 6  | 3.563933  | -1.198121 | -0.339101 |
| 1  | 4.259797  | -2.029386 | -0.210290 |
| 1  | 3.837320  | -0.702676 | -1.282801 |
| 6  | 2.070654  | -1.662465 | -0.339238 |



|    |           |           |           |
|----|-----------|-----------|-----------|
| 14 | 1.997683  | -2.971766 | 1.193256  |
| 6  | 1.143368  | -4.632529 | 0.770370  |
| 1  | 1.024933  | -5.189911 | 1.710714  |
| 1  | 0.156905  | -4.554403 | 0.310199  |
| 1  | 1.770562  | -5.241367 | 0.108648  |
| 6  | 3.759524  | -3.572390 | 1.672266  |
| 1  | 3.630777  | -4.289865 | 2.497091  |
| 1  | 4.289614  | -4.095029 | 0.867980  |
| 1  | 4.408547  | -2.769330 | 2.042165  |
| 6  | 1.316275  | -2.371744 | 2.862050  |
| 1  | 2.113293  | -1.903763 | 3.448210  |
| 1  | 0.498396  | -1.658734 | 2.760111  |
| 1  | 0.959574  | -3.239514 | 3.432124  |
| 14 | 1.984523  | -2.770125 | -2.008634 |
| 6  | 0.440248  | -3.863989 | -2.312292 |
| 1  | -0.425322 | -3.605819 | -1.698294 |
| 1  | 0.137700  | -3.773437 | -3.364905 |
| 1  | 0.670494  | -4.917983 | -2.121275 |
| 6  | 2.287729  | -1.855221 | -3.663511 |
| 1  | 3.135566  | -1.159752 | -3.636530 |
| 1  | 2.526253  | -2.625775 | -4.410374 |
| 1  | 1.404935  | -1.311179 | -4.015244 |
| 6  | 3.465313  | -3.973295 | -1.980034 |
| 1  | 3.526828  | -4.601719 | -1.087761 |
| 1  | 3.354211  | -4.639800 | -2.847419 |
| 1  | 4.418689  | -3.442761 | -2.093913 |
| 6  | -2.661072 | -0.779991 | 0.425511  |
| 14 | -2.699678 | -1.751165 | 2.150757  |
| 6  | -2.218841 | -0.687841 | 3.648684  |
| 1  | -2.225451 | -1.342094 | 4.532251  |
| 1  | -1.224876 | -0.243984 | 3.565866  |
| 1  | -2.941723 | 0.114480  | 3.832039  |
| 6  | -4.520433 | -2.225154 | 2.496654  |
| 1  | -4.915472 | -2.954393 | 1.780038  |
| 1  | -4.558356 | -2.694602 | 3.490372  |
| 1  | -5.195026 | -1.361005 | 2.514757  |
| 6  | -1.782357 | -3.405017 | 2.344581  |
| 1  | -2.418097 | -4.246454 | 2.051561  |
| 1  | -0.853636 | -3.470948 | 1.784923  |
| 1  | -1.534953 | -3.530618 | 3.407201  |

|    |           |           |           |
|----|-----------|-----------|-----------|
| 14 | -3.335876 | -2.090888 | -0.987568 |
| 6  | -2.992886 | -3.937077 | -0.618209 |
| 1  | -3.214807 | -4.497633 | -1.537909 |
| 1  | -1.965404 | -4.171325 | -0.330300 |
| 1  | -3.655050 | -4.322400 | 0.166078  |
| 6  | -5.252302 | -1.999865 | -1.037375 |
| 1  | -5.594780 | -2.812527 | -1.694841 |
| 1  | -5.738345 | -2.136739 | -0.066492 |
| 1  | -5.612135 | -1.058414 | -1.472514 |
| 6  | -2.959566 | -1.949564 | -2.860723 |
| 1  | -3.161868 | -0.960812 | -3.283981 |
| 1  | -1.951778 | -2.251735 | -3.149984 |
| 1  | -3.657828 | -2.653365 | -3.338348 |
| 6  | -3.829829 | 0.254392  | 0.541246  |
| 1  | -3.764221 | 0.803679  | 1.489890  |
| 1  | -4.819168 | -0.199690 | 0.505908  |
| 6  | -3.570715 | 1.205981  | -0.618737 |
| 1  | -4.252062 | 2.057744  | -0.628387 |
| 1  | -3.714333 | 0.670811  | -1.568836 |
| 6  | -2.068884 | 1.639267  | -0.438499 |
| 14 | -2.159773 | 3.059398  | 0.989158  |
| 6  | -1.290860 | 4.707356  | 0.550462  |
| 1  | -0.271119 | 4.621974  | 0.171964  |
| 1  | -1.870137 | 5.275867  | -0.185763 |
| 1  | -1.250014 | 5.307698  | 1.470485  |
| 6  | -3.962604 | 3.632872  | 1.284765  |
| 1  | -3.931992 | 4.379953  | 2.091421  |
| 1  | -4.415850 | 4.114437  | 0.410828  |
| 1  | -4.627192 | 2.825738  | 1.612304  |
| 6  | -1.568613 | 2.512964  | 2.705287  |
| 1  | -2.389276 | 2.036225  | 3.249181  |
| 1  | -0.734531 | 1.810120  | 2.679162  |
| 1  | -1.259445 | 3.395209  | 3.279613  |
| 14 | -1.730359 | 2.631375  | -2.159318 |
| 6  | -3.204872 | 3.835208  | -2.371886 |
| 1  | -3.404425 | 4.486236  | -1.516350 |
| 1  | -2.974589 | 4.483313  | -3.230372 |
| 1  | -4.129499 | 3.295443  | -2.612299 |
| 6  | -0.164319 | 3.717623  | -2.339572 |
| 1  | 0.644631  | 3.489768  | -1.643765 |

|   |           |           |           |
|---|-----------|-----------|-----------|
| 1 | 0.231826  | 3.594161  | -3.357096 |
| 1 | -0.417676 | 4.776738  | -2.213290 |
| 6 | -1.820732 | 1.696846  | -3.828075 |
| 1 | -2.633943 | 0.966536  | -3.901867 |
| 1 | -2.018244 | 2.472665  | -4.583069 |
| 1 | -0.884773 | 1.203289  | -4.107287 |
| 1 | -0.146477 | -1.643376 | -2.225669 |
| 1 | -1.136724 | -0.172215 | -2.627335 |
| 1 | 1.761806  | 0.117610  | -2.323318 |
| 1 | 0.597942  | 1.325783  | -1.784094 |

-----  
1

A

Frequencies -- -194.0258

Red. masses -- 3.3374

Frc consts -- 0.0740

IR Inten -- 39.3136

| Atom | AN | X     | Y     | Z     |
|------|----|-------|-------|-------|
| 1    | 6  | 0.00  | 0.01  | 0.15  |
| 2    | 6  | -0.12 | -0.02 | 0.33  |
| 3    | 6  | 0.03  | -0.02 | -0.11 |
| 4    | 6  | 0.01  | -0.06 | 0.12  |
| 5    | 6  | 0.02  | 0.04  | -0.05 |
| 6    | 6  | 0.01  | 0.01  | -0.02 |
| 7    | 14 | 0.00  | 0.00  | -0.01 |
| 8    | 6  | 0.00  | 0.00  | -0.01 |
| 9    | 1  | -0.01 | 0.00  | -0.01 |
| 10   | 1  | 0.01  | -0.01 | -0.02 |
| 11   | 1  | 0.00  | 0.00  | 0.00  |
| 12   | 6  | 0.00  | 0.00  | 0.00  |
| 13   | 1  | 0.00  | 0.00  | 0.00  |
| 14   | 1  | 0.00  | 0.00  | 0.00  |
| 15   | 1  | 0.00  | 0.00  | 0.00  |
| 16   | 6  | 0.00  | 0.00  | 0.00  |
| 17   | 1  | 0.00  | 0.00  | 0.00  |
| 18   | 1  | 0.01  | 0.00  | 0.00  |
| 19   | 1  | 0.00  | 0.00  | 0.00  |
| 20   | 14 | 0.01  | 0.01  | 0.00  |
| 21   | 6  | -0.01 | -0.01 | 0.00  |
| 22   | 1  | -0.03 | -0.01 | 0.01  |

|    |    |       |       |       |
|----|----|-------|-------|-------|
| 23 | 1  | -0.01 | 0.00  | 0.01  |
| 24 | 1  | -0.01 | -0.02 | -0.01 |
| 25 | 6  | 0.01  | 0.01  | -0.01 |
| 26 | 1  | 0.00  | 0.01  | 0.00  |
| 27 | 1  | 0.01  | 0.01  | 0.00  |
| 28 | 1  | 0.01  | 0.00  | 0.00  |
| 29 | 6  | 0.01  | 0.01  | -0.01 |
| 30 | 1  | 0.01  | 0.00  | -0.01 |
| 31 | 1  | 0.01  | 0.01  | -0.01 |
| 32 | 1  | 0.00  | 0.00  | 0.00  |
| 33 | 6  | 0.00  | 0.00  | -0.01 |
| 34 | 1  | -0.01 | 0.01  | -0.01 |
| 35 | 1  | 0.00  | 0.00  | 0.00  |
| 36 | 6  | 0.01  | 0.00  | 0.00  |
| 37 | 1  | 0.01  | 0.00  | 0.00  |
| 38 | 1  | 0.01  | -0.01 | -0.01 |
| 39 | 6  | 0.00  | 0.00  | 0.00  |
| 40 | 14 | 0.00  | 0.01  | 0.00  |
| 41 | 6  | 0.01  | 0.00  | 0.00  |
| 42 | 1  | 0.02  | 0.00  | 0.00  |
| 43 | 1  | 0.00  | -0.01 | 0.01  |
| 44 | 1  | 0.00  | 0.01  | -0.01 |
| 45 | 6  | 0.00  | 0.00  | -0.01 |
| 46 | 1  | 0.00  | 0.00  | -0.01 |
| 47 | 1  | 0.00  | 0.00  | -0.01 |
| 48 | 1  | 0.00  | 0.00  | -0.01 |
| 49 | 6  | 0.01  | -0.01 | 0.01  |
| 50 | 1  | 0.01  | -0.01 | 0.01  |
| 51 | 1  | 0.02  | 0.00  | 0.00  |
| 52 | 1  | 0.01  | -0.01 | 0.01  |
| 53 | 14 | -0.01 | 0.01  | 0.00  |
| 54 | 6  | 0.00  | -0.01 | 0.00  |
| 55 | 1  | 0.01  | -0.07 | 0.04  |
| 56 | 1  | -0.04 | 0.04  | 0.02  |
| 57 | 1  | 0.03  | -0.01 | -0.06 |
| 58 | 6  | -0.08 | 0.03  | 0.00  |
| 59 | 1  | -0.11 | 0.07  | -0.02 |
| 60 | 1  | -0.08 | 0.04  | -0.02 |
| 61 | 1  | -0.12 | -0.01 | 0.04  |
| 62 | 6  | 0.00  | 0.01  | -0.02 |

|     |    |       |       |       |
|-----|----|-------|-------|-------|
| 63  | 1  | 0.00  | 0.01  | -0.02 |
| 64  | 1  | 0.00  | 0.01  | -0.02 |
| 65  | 1  | 0.00  | 0.02  | -0.02 |
| 66  | 6  | 0.01  | -0.01 | -0.06 |
| 67  | 14 | 0.02  | 0.01  | -0.03 |
| 68  | 6  | 0.00  | 0.00  | -0.02 |
| 69  | 1  | -0.01 | 0.00  | -0.03 |
| 70  | 1  | 0.00  | 0.00  | -0.01 |
| 71  | 1  | 0.00  | 0.00  | -0.02 |
| 72  | 6  | 0.02  | 0.01  | -0.02 |
| 73  | 1  | 0.01  | 0.01  | -0.02 |
| 74  | 1  | 0.02  | 0.02  | -0.02 |
| 75  | 1  | 0.01  | 0.01  | -0.02 |
| 76  | 6  | 0.00  | 0.00  | -0.01 |
| 77  | 1  | 0.00  | 0.00  | -0.01 |
| 78  | 1  | 0.01  | 0.00  | 0.01  |
| 79  | 1  | -0.01 | 0.01  | 0.00  |
| 80  | 14 | -0.02 | -0.01 | -0.01 |
| 81  | 6  | -0.01 | -0.01 | -0.01 |
| 82  | 1  | 0.00  | -0.01 | 0.00  |
| 83  | 1  | -0.01 | 0.00  | 0.00  |
| 84  | 1  | -0.01 | 0.00  | -0.01 |
| 85  | 6  | -0.01 | 0.00  | -0.02 |
| 86  | 1  | -0.02 | 0.00  | -0.01 |
| 87  | 1  | -0.01 | 0.00  | -0.01 |
| 88  | 1  | -0.01 | 0.00  | -0.01 |
| 89  | 6  | 0.00  | -0.01 | -0.01 |
| 90  | 1  | -0.01 | -0.01 | -0.01 |
| 91  | 1  | 0.01  | 0.01  | -0.01 |
| 92  | 1  | 0.02  | -0.01 | -0.02 |
| 93  | 6  | 0.01  | 0.00  | -0.03 |
| 94  | 1  | 0.03  | -0.01 | -0.02 |
| 95  | 1  | 0.01  | 0.01  | -0.02 |
| 96  | 6  | 0.01  | 0.01  | -0.02 |
| 97  | 1  | 0.01  | 0.01  | -0.01 |
| 98  | 1  | 0.00  | 0.02  | -0.02 |
| 99  | 6  | 0.01  | 0.00  | -0.02 |
| 100 | 14 | 0.01  | -0.01 | 0.00  |
| 101 | 6  | 0.00  | 0.00  | 0.00  |
| 102 | 1  | 0.00  | 0.00  | 0.00  |

|     |    |       |       |       |
|-----|----|-------|-------|-------|
| 103 | 1  | 0.00  | 0.00  | 0.00  |
| 104 | 1  | 0.00  | -0.01 | 0.00  |
| 105 | 6  | 0.01  | -0.01 | 0.00  |
| 106 | 1  | 0.01  | -0.01 | 0.00  |
| 107 | 1  | 0.01  | 0.00  | 0.00  |
| 108 | 1  | 0.00  | -0.01 | -0.01 |
| 109 | 6  | 0.01  | -0.01 | -0.01 |
| 110 | 1  | 0.00  | 0.00  | 0.00  |
| 111 | 1  | 0.00  | -0.02 | 0.00  |
| 112 | 1  | 0.02  | -0.01 | -0.01 |
| 113 | 14 | 0.01  | 0.01  | 0.00  |
| 114 | 6  | 0.00  | 0.00  | -0.01 |
| 115 | 1  | 0.00  | 0.00  | -0.01 |
| 116 | 1  | 0.00  | 0.00  | -0.01 |
| 117 | 1  | 0.00  | 0.00  | -0.01 |
| 118 | 6  | 0.00  | 0.01  | -0.01 |
| 119 | 1  | 0.00  | 0.02  | -0.01 |
| 120 | 1  | 0.00  | 0.01  | -0.01 |
| 121 | 1  | 0.00  | 0.01  | -0.01 |
| 122 | 6  | 0.02  | -0.01 | 0.01  |
| 123 | 1  | 0.04  | -0.03 | 0.02  |
| 124 | 1  | 0.00  | -0.03 | 0.00  |
| 125 | 1  | 0.04  | 0.02  | 0.00  |
| 126 | 1  | -0.21 | -0.05 | 0.75  |
| 127 | 1  | 0.12  | -0.07 | -0.21 |
| 128 | 1  | -0.14 | 0.03  | -0.07 |
| 129 | 1  | -0.04 | 0.01  | 0.07  |

-----  
-----  
**Si=Si=Si (TS)**

| Atomic<br>Number | Atomic<br>Type | Coordinates (Angstroms) |           |           |
|------------------|----------------|-------------------------|-----------|-----------|
|                  |                | X                       | Y         | Z         |
| 6                | 0              | 1.276190                | -1.045307 | 1.932152  |
| 6                | 0              | 0.093316                | -0.572800 | 2.552121  |
| 14               | 0              | -1.994989               | -0.069636 | 0.004484  |
| 14               | 0              | -0.023477               | 0.205120  | -1.153887 |
| 14               | 0              | 1.947725                | -0.037833 | 0.151375  |

|    |   |          |           |           |
|----|---|----------|-----------|-----------|
| 6  | 0 | 3.513425 | -0.986934 | -0.621796 |
| 14 | 0 | 3.268221 | -1.696182 | -2.442065 |
| 6  | 0 | 3.101701 | -0.347295 | -3.772436 |
| 1  | 0 | 3.030011 | -0.858809 | -4.743763 |
| 1  | 0 | 2.200359 | 0.260294  | -3.652232 |
| 1  | 0 | 3.969572 | 0.321577  | -3.822745 |
| 6  | 0 | 4.777819 | -2.710315 | -3.034926 |
| 1  | 0 | 4.952478 | -3.628688 | -2.463565 |
| 1  | 0 | 4.589873 | -3.002389 | -4.078466 |
| 1  | 0 | 5.702996 | -2.119492 | -3.024824 |
| 6  | 0 | 1.748380 | -2.813399 | -2.664559 |
| 1  | 0 | 1.702551 | -3.638405 | -1.948888 |
| 1  | 0 | 0.811944 | -2.245792 | -2.592555 |
| 1  | 0 | 1.789236 | -3.247199 | -3.674707 |
| 14 | 0 | 4.277874 | -2.434412 | 0.486768  |
| 6  | 0 | 4.300157 | -2.250412 | 2.392473  |
| 1  | 0 | 4.591058 | -1.254497 | 2.744046  |
| 1  | 0 | 3.353846 | -2.525129 | 2.871466  |
| 1  | 0 | 5.062562 | -2.955989 | 2.756941  |
| 6  | 0 | 3.409334 | -4.106867 | 0.195883  |
| 1  | 0 | 3.588950 | -4.517841 | -0.803914 |
| 1  | 0 | 3.794501 | -4.832637 | 0.926366  |
| 1  | 0 | 2.322978 | -4.040804 | 0.340858  |
| 6  | 0 | 6.142047 | -2.624427 | 0.111405  |
| 1  | 0 | 6.485666 | -3.573345 | 0.549493  |
| 1  | 0 | 6.395550 | -2.637489 | -0.951039 |
| 1  | 0 | 6.718406 | -1.821171 | 0.590732  |
| 6  | 0 | 4.580058 | 0.183174  | -0.685966 |
| 1  | 0 | 4.416944 | 0.793736  | -1.583870 |
| 1  | 0 | 5.605095 | -0.203547 | -0.760261 |
| 6  | 0 | 4.438665 | 1.092851  | 0.556206  |
| 1  | 0 | 5.142865 | 1.933004  | 0.494388  |
| 1  | 0 | 4.727412 | 0.515188  | 1.444561  |
| 6  | 0 | 2.947108 | 1.608765  | 0.690976  |
| 14 | 0 | 2.718612 | 3.136224  | -0.551171 |
| 6  | 0 | 1.259063 | 4.244351  | -0.030587 |
| 1  | 0 | 1.093764 | 4.993831  | -0.817093 |
| 1  | 0 | 0.332419 | 3.665823  | 0.070733  |
| 1  | 0 | 1.429469 | 4.781445  | 0.909001  |
| 6  | 0 | 4.317094 | 4.187141  | -0.596202 |

|    |   |           |          |           |
|----|---|-----------|----------|-----------|
| 1  | 0 | 4.100757  | 5.109004 | -1.156056 |
| 1  | 0 | 4.709048  | 4.476691 | 0.381796  |
| 1  | 0 | 5.113448  | 3.661773 | -1.140962 |
| 6  | 0 | 2.435754  | 2.780159 | -2.396622 |
| 1  | 0 | 3.313752  | 2.338667 | -2.878767 |
| 1  | 0 | 1.572515  | 2.137523 | -2.590242 |
| 1  | 0 | 2.248705  | 3.749548 | -2.882783 |
| 14 | 0 | 2.716238  | 2.308523 | 2.508720  |
| 6  | 0 | 0.919672  | 2.774529 | 2.964119  |
| 1  | 0 | 0.182251  | 2.385509 | 2.254200  |
| 1  | 0 | 0.671088  | 2.389306 | 3.963205  |
| 1  | 0 | 0.806435  | 3.865306 | 2.998756  |
| 6  | 0 | 3.391077  | 1.154096 | 3.877106  |
| 1  | 0 | 4.445604  | 0.893256 | 3.716853  |
| 1  | 0 | 3.343935  | 1.720188 | 4.819222  |
| 1  | 0 | 2.828475  | 0.227684 | 4.034535  |
| 6  | 0 | 3.760381  | 3.885874 | 2.789279  |
| 1  | 0 | 3.427267  | 4.739526 | 2.189324  |
| 1  | 0 | 3.661752  | 4.169009 | 3.847514  |
| 1  | 0 | 4.828204  | 3.724619 | 2.591926  |
| 6  | 0 | -3.421576 | 1.086524 | -0.708919 |
| 14 | 0 | -3.134021 | 1.987959 | -2.430774 |
| 6  | 0 | -2.826901 | 0.777218 | -3.867166 |
| 1  | 0 | -2.769469 | 1.367560 | -4.793679 |
| 1  | 0 | -1.875027 | 0.247248 | -3.753218 |
| 1  | 0 | -3.627444 | 0.039840 | -3.998520 |
| 6  | 0 | -4.746271 | 2.905105 | -2.899988 |
| 1  | 0 | -4.974888 | 3.745919 | -2.234607 |
| 1  | 0 | -4.639267 | 3.310654 | -3.916415 |
| 1  | 0 | -5.612862 | 2.230743 | -2.905957 |
| 6  | 0 | -1.713838 | 3.248889 | -2.528186 |
| 1  | 0 | -1.785728 | 4.065069 | -1.804996 |
| 1  | 0 | -0.742923 | 2.757664 | -2.399828 |
| 1  | 0 | -1.727863 | 3.693482 | -3.534911 |
| 14 | 0 | -4.036729 | 2.418428 | 0.606741  |
| 6  | 0 | -3.329780 | 4.170835 | 0.353601  |
| 1  | 0 | -3.724483 | 4.804351 | 1.161199  |
| 1  | 0 | -2.235411 | 4.186701 | 0.431217  |
| 1  | 0 | -3.613458 | 4.634008 | -0.597168 |
| 6  | 0 | -5.939715 | 2.564216 | 0.546617  |



|    |   |           |           |           |
|----|---|-----------|-----------|-----------|
| 1  | 0 | -6.255062 | 3.354011  | 1.243612  |
| 1  | 0 | -6.313978 | 2.829797  | -0.448742 |
| 1  | 0 | -6.435051 | 1.635546  | 0.859140  |
| 6  | 0 | -3.605361 | 2.033758  | 2.417091  |
| 1  | 0 | -4.151083 | 1.169456  | 2.802404  |
| 1  | 0 | -2.533121 | 1.855326  | 2.566217  |
| 1  | 0 | -3.886093 | 2.902118  | 3.030809  |
| 6  | 0 | -4.561519 | 0.018778  | -0.963415 |
| 1  | 0 | -4.383714 | -0.487486 | -1.919278 |
| 1  | 0 | -5.548474 | 0.493146  | -1.042481 |
| 6  | 0 | -4.586544 | -1.042017 | 0.157441  |
| 1  | 0 | -5.292669 | -1.844191 | -0.104421 |
| 1  | 0 | -4.988307 | -0.569070 | 1.067355  |
| 6  | 0 | -3.145299 | -1.643216 | 0.453687  |
| 14 | 0 | -2.720004 | -3.110240 | -0.785448 |
| 6  | 0 | -0.944266 | -3.734231 | -0.520139 |
| 1  | 0 | -0.240437 | -2.907235 | -0.364780 |
| 1  | 0 | -0.870403 | -4.416224 | 0.332487  |
| 1  | 0 | -0.614195 | -4.278258 | -1.414314 |
| 6  | 0 | -3.884269 | -4.609649 | -0.562431 |
| 1  | 0 | -3.679596 | -5.316468 | -1.379603 |
| 1  | 0 | -3.728247 | -5.144745 | 0.381024  |
| 1  | 0 | -4.944276 | -4.332418 | -0.628700 |
| 6  | 0 | -2.905718 | -2.661231 | -2.622854 |
| 1  | 0 | -3.948559 | -2.457235 | -2.897917 |
| 1  | 0 | -2.295209 | -1.804951 | -2.920904 |
| 1  | 0 | -2.576272 | -3.526954 | -3.216172 |
| 14 | 0 | -3.289000 | -2.401744 | 2.265777  |
| 6  | 0 | -4.988517 | -3.256770 | 2.449499  |
| 1  | 0 | -5.142776 | -4.085623 | 1.752578  |
| 1  | 0 | -5.062415 | -3.660477 | 3.470129  |
| 1  | 0 | -5.816137 | -2.547686 | 2.319773  |
| 6  | 0 | -1.985567 | -3.723675 | 2.708103  |
| 1  | 0 | -0.949885 | -3.402282 | 2.552192  |
| 1  | 0 | -2.099454 | -3.958608 | 3.776167  |
| 1  | 0 | -2.138629 | -4.656300 | 2.152425  |
| 6  | 0 | -3.295339 | -1.164042 | 3.719289  |
| 1  | 0 | -4.263772 | -0.656195 | 3.801248  |
| 1  | 0 | -3.162363 | -1.749217 | 4.641490  |
| 1  | 0 | -2.515129 | -0.399460 | 3.694286  |

|   |   |           |           |          |
|---|---|-----------|-----------|----------|
| 1 | 0 | 0.089489  | 0.305093  | 3.188781 |
| 1 | 0 | -0.837388 | -1.112209 | 2.463214 |
| 1 | 0 | 2.191273  | -0.809685 | 2.477004 |
| 1 | 0 | 1.246154  | -2.082988 | 1.590271 |

-----

1

A

Frequencies -- -134.4541

Red. masses -- 5.8682

Frc consts -- 0.0625

IR Inten -- 13.5427

| Atom | AN | X     | Y     | Z     |
|------|----|-------|-------|-------|
| 1    | 6  | 0.05  | -0.19 | 0.26  |
| 2    | 6  | 0.23  | -0.11 | 0.34  |
| 3    | 14 | -0.07 | 0.05  | -0.08 |
| 4    | 14 | -0.02 | 0.00  | 0.16  |
| 5    | 14 | 0.02  | 0.04  | -0.06 |
| 6    | 6  | 0.02  | 0.02  | -0.02 |
| 7    | 14 | 0.00  | 0.00  | -0.02 |
| 8    | 6  | 0.00  | 0.00  | -0.01 |
| 9    | 1  | -0.01 | 0.01  | -0.01 |
| 10   | 1  | 0.00  | 0.00  | 0.00  |
| 11   | 1  | -0.01 | 0.01  | -0.01 |
| 12   | 6  | 0.01  | 0.01  | -0.01 |
| 13   | 1  | 0.01  | 0.01  | -0.01 |
| 14   | 1  | 0.01  | 0.01  | -0.01 |
| 15   | 1  | 0.01  | 0.01  | -0.01 |
| 16   | 6  | 0.02  | -0.01 | -0.01 |
| 17   | 1  | 0.03  | -0.02 | -0.02 |
| 18   | 1  | 0.01  | -0.02 | 0.01  |
| 19   | 1  | 0.02  | 0.00  | -0.01 |
| 20   | 14 | 0.01  | 0.00  | -0.01 |
| 21   | 6  | 0.05  | -0.02 | -0.01 |
| 22   | 1  | -0.01 | -0.01 | 0.01  |
| 23   | 1  | 0.09  | -0.11 | 0.02  |
| 24   | 1  | 0.12  | 0.03  | -0.05 |
| 25   | 6  | 0.00  | 0.01  | -0.01 |
| 26   | 1  | 0.01  | 0.00  | -0.01 |
| 27   | 1  | 0.00  | 0.01  | 0.00  |
| 28   | 1  | 0.00  | 0.01  | -0.02 |

|    |    |       |       |       |
|----|----|-------|-------|-------|
| 29 | 6  | 0.00  | 0.01  | -0.03 |
| 30 | 1  | 0.00  | -0.01 | -0.05 |
| 31 | 1  | 0.00  | 0.03  | -0.03 |
| 32 | 1  | 0.01  | -0.01 | -0.01 |
| 33 | 6  | 0.03  | 0.01  | 0.00  |
| 34 | 1  | 0.04  | 0.01  | 0.00  |
| 35 | 1  | 0.02  | 0.00  | 0.01  |
| 36 | 6  | 0.02  | 0.00  | 0.00  |
| 37 | 1  | 0.02  | 0.01  | 0.00  |
| 38 | 1  | 0.03  | 0.00  | 0.00  |
| 39 | 6  | 0.02  | -0.01 | 0.01  |
| 40 | 14 | 0.00  | 0.00  | 0.00  |
| 41 | 6  | 0.00  | -0.01 | 0.00  |
| 42 | 1  | -0.01 | -0.02 | -0.01 |
| 43 | 1  | 0.01  | -0.02 | 0.02  |
| 44 | 1  | 0.01  | 0.01  | -0.01 |
| 45 | 6  | 0.01  | -0.01 | 0.00  |
| 46 | 1  | 0.00  | 0.00  | 0.01  |
| 47 | 1  | 0.01  | -0.01 | 0.00  |
| 48 | 1  | 0.00  | 0.00  | 0.00  |
| 49 | 6  | 0.00  | 0.00  | 0.00  |
| 50 | 1  | 0.00  | -0.01 | 0.00  |
| 51 | 1  | 0.00  | 0.01  | 0.00  |
| 52 | 1  | 0.01  | 0.00  | 0.00  |
| 53 | 14 | 0.00  | 0.00  | 0.00  |
| 54 | 6  | -0.01 | -0.01 | -0.02 |
| 55 | 1  | 0.00  | -0.08 | 0.00  |
| 56 | 1  | 0.00  | 0.04  | 0.00  |
| 57 | 1  | -0.03 | -0.01 | -0.09 |
| 58 | 6  | -0.01 | -0.01 | 0.00  |
| 59 | 1  | -0.01 | -0.02 | 0.00  |
| 60 | 1  | 0.00  | 0.00  | 0.00  |
| 61 | 1  | -0.02 | 0.00  | 0.01  |
| 62 | 6  | 0.00  | 0.00  | 0.00  |
| 63 | 1  | 0.00  | -0.01 | 0.00  |
| 64 | 1  | -0.01 | 0.00  | 0.00  |
| 65 | 1  | 0.00  | 0.00  | 0.01  |
| 66 | 6  | -0.06 | -0.01 | -0.06 |
| 67 | 14 | -0.03 | 0.00  | -0.04 |
| 68 | 6  | -0.01 | -0.01 | -0.02 |

|     |    |       |       |       |
|-----|----|-------|-------|-------|
| 69  | 1  | 0.02  | -0.02 | -0.03 |
| 70  | 1  | -0.01 | -0.01 | 0.01  |
| 71  | 1  | -0.01 | -0.01 | -0.03 |
| 72  | 6  | -0.02 | 0.02  | -0.04 |
| 73  | 1  | -0.02 | 0.01  | -0.04 |
| 74  | 1  | -0.02 | 0.02  | -0.04 |
| 75  | 1  | -0.02 | 0.02  | -0.05 |
| 76  | 6  | -0.01 | -0.02 | -0.01 |
| 77  | 1  | -0.03 | -0.01 | -0.02 |
| 78  | 1  | -0.02 | -0.03 | 0.04  |
| 79  | 1  | 0.03  | -0.04 | -0.02 |
| 80  | 14 | -0.02 | -0.01 | -0.03 |
| 81  | 6  | -0.01 | -0.01 | -0.02 |
| 82  | 1  | 0.00  | -0.02 | -0.01 |
| 83  | 1  | -0.01 | -0.02 | -0.03 |
| 84  | 1  | -0.01 | 0.00  | -0.01 |
| 85  | 6  | -0.02 | 0.01  | -0.01 |
| 86  | 1  | 0.00  | 0.01  | 0.00  |
| 87  | 1  | -0.02 | 0.01  | 0.00  |
| 88  | 1  | -0.02 | 0.01  | 0.00  |
| 89  | 6  | -0.01 | -0.02 | -0.03 |
| 90  | 1  | 0.00  | -0.02 | -0.03 |
| 91  | 1  | 0.00  | -0.01 | -0.03 |
| 92  | 1  | 0.00  | -0.02 | -0.03 |
| 93  | 6  | -0.07 | 0.00  | -0.03 |
| 94  | 1  | -0.08 | -0.01 | -0.03 |
| 95  | 1  | -0.07 | -0.02 | -0.01 |
| 96  | 6  | -0.03 | 0.00  | -0.01 |
| 97  | 1  | -0.02 | -0.01 | 0.00  |
| 98  | 1  | -0.03 | 0.01  | -0.02 |
| 99  | 6  | -0.01 | 0.03  | -0.01 |
| 100 | 14 | 0.00  | 0.01  | 0.00  |
| 101 | 6  | 0.00  | 0.02  | -0.01 |
| 102 | 1  | -0.01 | 0.03  | -0.07 |
| 103 | 1  | 0.02  | 0.05  | 0.02  |
| 104 | 1  | -0.02 | -0.02 | 0.00  |
| 105 | 6  | 0.00  | 0.01  | 0.01  |
| 106 | 1  | 0.00  | 0.01  | 0.01  |
| 107 | 1  | 0.01  | 0.01  | 0.01  |
| 108 | 1  | 0.00  | 0.01  | 0.01  |

|     |    |       |       |       |
|-----|----|-------|-------|-------|
| 109 | 6  | -0.01 | 0.00  | -0.01 |
| 110 | 1  | -0.01 | -0.01 | 0.00  |
| 111 | 1  | -0.01 | 0.00  | -0.01 |
| 112 | 1  | -0.01 | -0.01 | 0.00  |
| 113 | 14 | 0.00  | 0.02  | -0.01 |
| 114 | 6  | 0.01  | 0.01  | 0.00  |
| 115 | 1  | 0.01  | 0.01  | 0.00  |
| 116 | 1  | 0.02  | 0.01  | 0.00  |
| 117 | 1  | 0.00  | 0.01  | 0.01  |
| 118 | 6  | 0.01  | 0.03  | -0.01 |
| 119 | 1  | 0.01  | 0.05  | 0.03  |
| 120 | 1  | -0.01 | 0.01  | -0.01 |
| 121 | 1  | 0.04  | 0.04  | -0.03 |
| 122 | 6  | 0.00  | 0.01  | 0.00  |
| 123 | 1  | 0.00  | 0.01  | 0.01  |
| 124 | 1  | 0.01  | 0.01  | -0.01 |
| 125 | 1  | 0.00  | 0.02  | 0.00  |
| 126 | 1  | 0.38  | -0.17 | 0.42  |
| 127 | 1  | 0.04  | 0.26  | 0.02  |
| 128 | 1  | 0.21  | -0.17 | -0.05 |
| 129 | 1  | -0.04 | -0.09 | -0.03 |

-----  
-----  
**Si=Ge=Si (TS)**

-----

| Atomic<br>Number | Coordinates (Angstroms) |           |           |
|------------------|-------------------------|-----------|-----------|
|                  | X                       | Y         | Z         |
| 6                | 1.263299                | -1.124796 | 2.098088  |
| 6                | 0.075609                | -0.663932 | 2.665085  |
| 14               | -2.060994               | -0.057220 | 0.074810  |
| 32               | -0.030974               | 0.184048  | -1.180094 |
| 14               | 2.019961                | -0.038529 | 0.174058  |
| 6                | 3.587677                | -0.990626 | -0.591622 |
| 14               | 3.333424                | -1.695332 | -2.411822 |
| 6                | 3.189958                | -0.339814 | -3.739127 |
| 1                | 3.116894                | -0.846175 | -4.712985 |
| 1                | 2.296984                | 0.280959  | -3.623512 |
| 1                | 4.067079                | 0.317526  | -3.781722 |

|    |          |           |           |
|----|----------|-----------|-----------|
| 6  | 4.824062 | -2.733546 | -3.009611 |
| 1  | 4.984402 | -3.655913 | -2.440551 |
| 1  | 4.629882 | -3.020161 | -4.053544 |
| 1  | 5.758921 | -2.158214 | -2.999330 |
| 6  | 1.791863 | -2.784977 | -2.628718 |
| 1  | 1.727169 | -3.602517 | -1.905916 |
| 1  | 0.865134 | -2.200153 | -2.562175 |
| 1  | 1.823705 | -3.228196 | -3.635100 |
| 14 | 4.323429 | -2.452393 | 0.517428  |
| 6  | 4.342741 | -2.268462 | 2.421659  |
| 1  | 4.655210 | -1.279311 | 2.773227  |
| 1  | 3.388464 | -2.520191 | 2.896929  |
| 1  | 5.086579 | -2.992022 | 2.789960  |
| 6  | 3.425823 | -4.107895 | 0.220376  |
| 1  | 3.601265 | -4.520454 | -0.779476 |
| 1  | 3.795057 | -4.841761 | 0.950857  |
| 1  | 2.340468 | -4.022011 | 0.361925  |
| 6  | 6.184730 | -2.671757 | 0.143648  |
| 1  | 6.513413 | -3.625590 | 0.582393  |
| 1  | 6.439084 | -2.689048 | -0.918567 |
| 1  | 6.772974 | -1.877363 | 0.623110  |
| 6  | 4.664562 | 0.169408  | -0.641387 |
| 1  | 4.513082 | 0.785742  | -1.537613 |
| 1  | 5.687011 | -0.225699 | -0.709737 |
| 6  | 4.523002 | 1.073633  | 0.605422  |
| 1  | 5.226024 | 1.915056  | 0.545123  |
| 1  | 4.813858 | 0.493152  | 1.490913  |
| 6  | 3.031639 | 1.586016  | 0.748249  |
| 14 | 2.791763 | 3.126600  | -0.478430 |
| 6  | 1.317452 | 4.210221  | 0.050668  |
| 1  | 1.140222 | 4.963943  | -0.729230 |
| 1  | 0.399427 | 3.617044  | 0.148038  |
| 1  | 1.480048 | 4.741549  | 0.994845  |
| 6  | 4.382234 | 4.189027  | -0.512547 |
| 1  | 4.158834 | 5.117929  | -1.057729 |
| 1  | 4.774340 | 4.465916  | 0.468915  |
| 1  | 5.180325 | 3.676573  | -1.066894 |
| 6  | 2.512447 | 2.785657  | -2.327980 |
| 1  | 3.386547 | 2.338174  | -2.811554 |
| 1  | 1.642341 | 2.154373  | -2.530177 |

|    |           |          |           |
|----|-----------|----------|-----------|
| 1  | 2.336462  | 3.760422 | -2.807578 |
| 14 | 2.793006  | 2.265912 | 2.573028  |
| 6  | 0.987563  | 2.689149 | 3.030065  |
| 1  | 0.258933  | 2.284840 | 2.319457  |
| 1  | 0.747609  | 2.295461 | 4.028016  |
| 1  | 0.849159  | 3.777065 | 3.067606  |
| 6  | 3.497752  | 1.114693 | 3.927516  |
| 1  | 4.557296  | 0.879689 | 3.761896  |
| 1  | 3.439634  | 1.670767 | 4.875075  |
| 1  | 2.957279  | 0.174514 | 4.077363  |
| 6  | 3.806052  | 3.861269 | 2.865188  |
| 1  | 3.460539  | 4.712314 | 2.268749  |
| 1  | 3.698237  | 4.136744 | 3.924540  |
| 1  | 4.877336  | 3.719779 | 2.671810  |
| 6  | -3.485687 | 1.095595 | -0.654596 |
| 14 | -3.190279 | 2.015391 | -2.361696 |
| 6  | -2.908510 | 0.822542 | -3.819469 |
| 1  | -2.846687 | 1.426772 | -4.736662 |
| 1  | -1.966260 | 0.271668 | -3.724764 |
| 1  | -3.722180 | 0.100838 | -3.957131 |
| 6  | -4.780543 | 2.973429 | -2.821011 |
| 1  | -4.991611 | 3.810883 | -2.145726 |
| 1  | -4.665360 | 3.387900 | -3.832906 |
| 1  | -5.660652 | 2.316859 | -2.833507 |
| 6  | -1.741475 | 3.247632 | -2.441985 |
| 1  | -1.785170 | 4.040825 | -1.691588 |
| 1  | -0.775921 | 2.737314 | -2.344457 |
| 1  | -1.759735 | 3.724948 | -3.433439 |
| 14 | -4.088647 | 2.419925 | 0.675790  |
| 6  | -3.349785 | 4.163131 | 0.447674  |
| 1  | -3.737108 | 4.794338 | 1.260608  |
| 1  | -2.255671 | 4.156602 | 0.532358  |
| 1  | -3.619045 | 4.642788 | -0.499124 |
| 6  | -5.988950 | 2.593570 | 0.609399  |
| 1  | -6.296371 | 3.382215 | 1.311230  |
| 1  | -6.356671 | 2.870414 | -0.385237 |
| 1  | -6.496415 | 1.668758 | 0.913960  |
| 6  | -3.673156 | 2.009677 | 2.484424  |
| 1  | -4.219502 | 1.138631 | 2.853494  |
| 1  | -2.601707 | 1.831594 | 2.639580  |

|    |           |           |           |
|----|-----------|-----------|-----------|
| 1  | -3.961214 | 2.869151  | 3.107370  |
| 6  | -4.629294 | 0.035290  | -0.916498 |
| 1  | -4.453229 | -0.464459 | -1.876111 |
| 1  | -5.615932 | 0.512119  | -0.990982 |
| 6  | -4.656338 | -1.034810 | 0.196590  |
| 1  | -5.363222 | -1.834115 | -0.072619 |
| 1  | -5.059303 | -0.568641 | 1.109622  |
| 6  | -3.216315 | -1.638261 | 0.491587  |
| 14 | -2.784848 | -3.090084 | -0.763622 |
| 6  | -1.003527 | -3.710049 | -0.518479 |
| 1  | -0.302456 | -2.882374 | -0.353530 |
| 1  | -0.921865 | -4.405456 | 0.322772  |
| 1  | -0.675599 | -4.238131 | -1.423358 |
| 6  | -3.941073 | -4.597889 | -0.549874 |
| 1  | -3.731076 | -5.300245 | -1.369574 |
| 1  | -3.786117 | -5.136296 | 0.391727  |
| 1  | -5.002066 | -4.324515 | -0.618038 |
| 6  | -2.986218 | -2.633142 | -2.598361 |
| 1  | -4.031742 | -2.430673 | -2.864334 |
| 1  | -2.379813 | -1.774839 | -2.898623 |
| 1  | -2.659438 | -3.496382 | -3.196891 |
| 14 | -3.358741 | -2.419849 | 2.293431  |
| 6  | -5.063259 | -3.266440 | 2.473134  |
| 1  | -5.223319 | -4.085863 | 1.766077  |
| 1  | -5.136981 | -3.682531 | 3.488814  |
| 1  | -5.887302 | -2.551309 | 2.353886  |
| 6  | -2.064804 | -3.759521 | 2.712083  |
| 1  | -1.027001 | -3.442880 | 2.562843  |
| 1  | -2.180891 | -4.011906 | 3.775896  |
| 1  | -2.224145 | -4.681182 | 2.140289  |
| 6  | -3.343880 | -1.199479 | 3.761216  |
| 1  | -4.308168 | -0.686419 | 3.859452  |
| 1  | -3.202945 | -1.793836 | 4.676353  |
| 1  | -2.558778 | -0.439827 | 3.732207  |
| 1  | 0.039599  | 0.215713  | 3.299415  |
| 1  | -0.857161 | -1.185089 | 2.504722  |
| 1  | 2.190836  | -0.821271 | 2.577211  |
| 1  | 1.272390  | -2.135549 | 1.687881  |



A

|             |    |           |       |       |
|-------------|----|-----------|-------|-------|
| Frequencies | -- | -175.6979 |       |       |
| Red. masses | -- | 9.2733    |       |       |
| Frc consts  | -- | 0.1687    |       |       |
| IR Inten    | -- | 13.9773   |       |       |
| Atom        | AN | X         | Y     | Z     |
| 1           | 6  | -0.15     | -0.32 | 0.52  |
| 2           | 6  | 0.00      | -0.11 | 0.34  |
| 3           | 14 | -0.04     | 0.06  | -0.06 |
| 4           | 32 | -0.01     | -0.01 | 0.08  |
| 5           | 14 | 0.07      | 0.08  | -0.19 |
| 6           | 6  | 0.05      | 0.04  | -0.06 |
| 7           | 14 | 0.02      | 0.00  | -0.04 |
| 8           | 6  | 0.01      | 0.00  | -0.03 |
| 9           | 1  | -0.01     | 0.02  | -0.03 |
| 10          | 1  | 0.01      | 0.01  | -0.01 |
| 11          | 1  | 0.01      | 0.00  | -0.03 |
| 12          | 6  | 0.02      | 0.00  | -0.02 |
| 13          | 1  | 0.02      | 0.00  | -0.01 |
| 14          | 1  | 0.03      | -0.01 | -0.02 |
| 15          | 1  | 0.02      | 0.00  | -0.02 |
| 16          | 6  | 0.03      | -0.01 | -0.01 |
| 17          | 1  | 0.04      | -0.01 | -0.01 |
| 18          | 1  | 0.03      | -0.02 | 0.01  |
| 19          | 1  | 0.02      | -0.01 | -0.01 |
| 20          | 14 | 0.00      | 0.02  | -0.02 |
| 21          | 6  | 0.01      | 0.01  | -0.02 |
| 22          | 1  | -0.04     | 0.02  | 0.00  |
| 23          | 1  | 0.03      | -0.06 | -0.01 |
| 24          | 1  | 0.05      | 0.04  | -0.04 |
| 25          | 6  | -0.01     | 0.02  | -0.01 |
| 26          | 1  | 0.00      | 0.01  | -0.01 |
| 27          | 1  | -0.02     | 0.03  | 0.00  |
| 28          | 1  | -0.01     | 0.03  | -0.03 |
| 29          | 6  | 0.00      | 0.01  | -0.01 |
| 30          | 1  | -0.02     | 0.00  | -0.02 |
| 31          | 1  | 0.00      | 0.02  | -0.01 |
| 32          | 1  | 0.00      | -0.01 | 0.00  |
| 33          | 6  | 0.07      | 0.02  | -0.02 |
| 34          | 1  | 0.10      | 0.02  | -0.02 |

|    |    |       |       |       |
|----|----|-------|-------|-------|
| 35 | 1  | 0.07  | 0.01  | 0.01  |
| 36 | 6  | 0.04  | 0.01  | -0.01 |
| 37 | 1  | 0.03  | 0.02  | 0.00  |
| 38 | 1  | 0.04  | 0.01  | -0.01 |
| 39 | 6  | 0.04  | -0.01 | -0.02 |
| 40 | 14 | 0.01  | 0.01  | -0.02 |
| 41 | 6  | 0.01  | 0.00  | 0.00  |
| 42 | 1  | 0.00  | -0.01 | 0.00  |
| 43 | 1  | 0.01  | -0.02 | -0.01 |
| 44 | 1  | 0.00  | 0.00  | 0.00  |
| 45 | 6  | 0.01  | 0.01  | 0.00  |
| 46 | 1  | 0.02  | 0.01  | 0.01  |
| 47 | 1  | 0.01  | 0.00  | 0.00  |
| 48 | 1  | 0.01  | 0.01  | 0.00  |
| 49 | 6  | 0.02  | 0.02  | -0.02 |
| 50 | 1  | 0.02  | 0.01  | -0.01 |
| 51 | 1  | 0.01  | 0.05  | -0.03 |
| 52 | 1  | 0.05  | 0.03  | -0.01 |
| 53 | 14 | 0.00  | -0.01 | -0.01 |
| 54 | 6  | 0.00  | -0.03 | -0.03 |
| 55 | 1  | 0.01  | -0.06 | -0.03 |
| 56 | 1  | 0.00  | 0.00  | -0.02 |
| 57 | 1  | -0.02 | -0.03 | -0.06 |
| 58 | 6  | 0.00  | -0.01 | -0.01 |
| 59 | 1  | 0.00  | 0.00  | -0.01 |
| 60 | 1  | 0.00  | 0.00  | -0.01 |
| 61 | 1  | 0.01  | -0.01 | -0.01 |
| 62 | 6  | -0.01 | -0.01 | -0.01 |
| 63 | 1  | -0.01 | -0.01 | -0.01 |
| 64 | 1  | -0.02 | -0.01 | -0.01 |
| 65 | 1  | 0.00  | 0.00  | 0.00  |
| 66 | 6  | -0.04 | -0.01 | -0.05 |
| 67 | 14 | -0.02 | 0.00  | -0.02 |
| 68 | 6  | 0.00  | 0.00  | -0.01 |
| 69 | 1  | 0.01  | -0.01 | -0.02 |
| 70 | 1  | -0.01 | -0.01 | 0.00  |
| 71 | 1  | 0.00  | 0.00  | -0.02 |
| 72 | 6  | -0.01 | 0.01  | -0.03 |
| 73 | 1  | -0.01 | 0.01  | -0.02 |
| 74 | 1  | -0.02 | 0.02  | -0.03 |

|     |    |       |       |       |
|-----|----|-------|-------|-------|
| 75  | 1  | -0.01 | 0.01  | -0.03 |
| 76  | 6  | -0.01 | -0.01 | -0.01 |
| 77  | 1  | -0.01 | -0.01 | -0.01 |
| 78  | 1  | -0.01 | -0.01 | 0.01  |
| 79  | 1  | 0.00  | -0.01 | -0.01 |
| 80  | 14 | 0.00  | -0.01 | -0.02 |
| 81  | 6  | 0.00  | -0.01 | -0.01 |
| 82  | 1  | 0.00  | -0.01 | 0.00  |
| 83  | 1  | 0.00  | -0.01 | -0.02 |
| 84  | 1  | 0.00  | 0.00  | -0.01 |
| 85  | 6  | 0.00  | 0.00  | 0.00  |
| 86  | 1  | 0.00  | 0.00  | 0.00  |
| 87  | 1  | -0.01 | 0.00  | 0.00  |
| 88  | 1  | -0.01 | 0.00  | 0.00  |
| 89  | 6  | 0.00  | -0.01 | -0.02 |
| 90  | 1  | 0.01  | -0.02 | -0.02 |
| 91  | 1  | 0.00  | 0.00  | -0.02 |
| 92  | 1  | -0.01 | -0.01 | -0.02 |
| 93  | 6  | -0.04 | 0.00  | -0.02 |
| 94  | 1  | -0.06 | -0.01 | -0.02 |
| 95  | 1  | -0.05 | -0.02 | 0.00  |
| 96  | 6  | -0.01 | 0.00  | -0.01 |
| 97  | 1  | 0.00  | -0.01 | 0.01  |
| 98  | 1  | -0.01 | 0.01  | -0.01 |
| 99  | 6  | 0.00  | 0.03  | -0.01 |
| 100 | 14 | 0.01  | 0.01  | 0.00  |
| 101 | 6  | 0.00  | 0.00  | 0.00  |
| 102 | 1  | 0.00  | 0.01  | -0.03 |
| 103 | 1  | 0.01  | 0.02  | 0.01  |
| 104 | 1  | -0.01 | -0.02 | 0.00  |
| 105 | 6  | 0.00  | 0.01  | 0.01  |
| 106 | 1  | 0.00  | 0.01  | 0.01  |
| 107 | 1  | 0.00  | 0.01  | 0.01  |
| 108 | 1  | 0.00  | 0.01  | 0.01  |
| 109 | 6  | -0.01 | 0.00  | 0.00  |
| 110 | 1  | -0.01 | -0.01 | 0.00  |
| 111 | 1  | -0.01 | -0.01 | -0.01 |
| 112 | 1  | -0.01 | -0.01 | 0.00  |
| 113 | 14 | 0.00  | 0.01  | 0.00  |
| 114 | 6  | 0.00  | 0.00  | -0.01 |

|     |   |       |       |       |
|-----|---|-------|-------|-------|
| 115 | 1 | 0.00  | 0.00  | -0.01 |
| 116 | 1 | 0.00  | 0.01  | -0.01 |
| 117 | 1 | 0.00  | 0.00  | -0.01 |
| 118 | 6 | 0.00  | 0.02  | 0.00  |
| 119 | 1 | 0.00  | 0.02  | 0.02  |
| 120 | 1 | -0.01 | 0.01  | 0.00  |
| 121 | 1 | 0.01  | 0.02  | -0.01 |
| 122 | 6 | -0.03 | 0.00  | 0.01  |
| 123 | 1 | -0.05 | -0.03 | 0.01  |
| 124 | 1 | -0.02 | -0.01 | 0.00  |
| 125 | 1 | -0.06 | 0.03  | 0.03  |
| 126 | 1 | 0.10  | -0.08 | 0.31  |
| 127 | 1 | -0.13 | 0.20  | 0.09  |
| 128 | 1 | 0.01  | -0.15 | 0.05  |
| 129 | 1 | -0.21 | -0.15 | 0.11  |

-----  
-----  
**Ge=Si=Ge (TS)**

-----

| Atomic<br>Number | Coordinates (Angstroms) |           |           |
|------------------|-------------------------|-----------|-----------|
|                  | X                       | Y         | Z         |
| 6                | -1.004876               | -0.963225 | -2.185686 |
| 6                | 0.279836                | -0.531507 | -2.524903 |
| 32               | 1.982186                | -0.018683 | -0.075132 |
| 14               | -0.000319               | 0.084726  | 1.298306  |
| 32               | -1.981846               | -0.055447 | -0.120765 |
| 6                | -3.620432               | -1.077851 | 0.633472  |
| 14               | -3.376726               | -1.801564 | 2.440735  |
| 6                | -3.283516               | -0.455850 | 3.782167  |
| 1                | -3.202763               | -0.964005 | 4.754416  |
| 1                | -2.406648               | 0.189273  | 3.674111  |
| 1                | -4.179184               | 0.176697  | 3.821092  |
| 6                | -4.857554               | -2.882674 | 2.985817  |
| 1                | -4.975688               | -3.801598 | 2.400209  |
| 1                | -4.692505               | -3.177742 | 4.032374  |
| 1                | -5.805585               | -2.330051 | 2.948702  |
| 6                | -1.813073               | -2.860641 | 2.662818  |
| 1                | -1.708473               | -3.652030 | 1.915578  |

|    |           |           |           |
|----|-----------|-----------|-----------|
| 1  | -0.900711 | -2.248778 | 2.641519  |
| 1  | -1.856738 | -3.337802 | 3.653128  |
| 14 | -4.270333 | -2.510027 | -0.542418 |
| 6  | -4.197339 | -2.234302 | -2.430622 |
| 1  | -4.650772 | -1.290894 | -2.750654 |
| 1  | -3.188878 | -2.292914 | -2.851784 |
| 1  | -4.784214 | -3.045520 | -2.887501 |
| 6  | -3.334442 | -4.147254 | -0.266144 |
| 1  | -3.527430 | -4.591749 | 0.716859  |
| 1  | -3.658843 | -4.871601 | -1.026642 |
| 1  | -2.248415 | -4.023888 | -0.371217 |
| 6  | -6.136913 | -2.798972 | -0.250562 |
| 1  | -6.432564 | -3.725005 | -0.765074 |
| 1  | -6.416309 | -2.898893 | 0.801592  |
| 1  | -6.732238 | -1.984402 | -0.685161 |
| 6  | -4.694323 | 0.080869  | 0.682316  |
| 1  | -4.558620 | 0.681407  | 1.591713  |
| 1  | -5.716034 | -0.322703 | 0.731843  |
| 6  | -4.568963 | 1.019363  | -0.544541 |
| 1  | -5.306707 | 1.830410  | -0.461952 |
| 1  | -4.840604 | 0.450435  | -1.443224 |
| 6  | -3.110351 | 1.609125  | -0.690709 |
| 14 | -2.887871 | 3.121854  | 0.557118  |
| 6  | -1.417833 | 4.214423  | 0.036387  |
| 1  | -1.265830 | 4.992327  | 0.797804  |
| 1  | -0.490820 | 3.629511  | -0.022582 |
| 1  | -1.563179 | 4.715183  | -0.927126 |
| 6  | -4.487707 | 4.168144  | 0.599102  |
| 1  | -4.287180 | 5.083071  | 1.175563  |
| 1  | -4.861738 | 4.468491  | -0.382807 |
| 1  | -5.291031 | 3.630003  | 1.120597  |
| 6  | -2.600234 | 2.732569  | 2.394925  |
| 1  | -3.472898 | 2.270138  | 2.867982  |
| 1  | -1.731178 | 2.091721  | 2.573233  |
| 1  | -2.420227 | 3.690722  | 2.905202  |
| 14 | -2.890973 | 2.291564  | -2.512227 |
| 6  | -1.078377 | 2.674248  | -2.973917 |
| 1  | -0.368192 | 2.340380  | -2.210622 |
| 1  | -0.811756 | 2.190737  | -3.923494 |
| 1  | -0.938639 | 3.754697  | -3.106037 |

|    |           |           |           |
|----|-----------|-----------|-----------|
| 6  | -3.630533 | 1.154215  | -3.859143 |
| 1  | -4.708636 | 1.003514  | -3.718251 |
| 1  | -3.502349 | 1.673579  | -4.820359 |
| 1  | -3.164514 | 0.169933  | -3.962530 |
| 6  | -3.877570 | 3.904780  | -2.794387 |
| 1  | -3.521430 | 4.747763  | -2.192669 |
| 1  | -3.766535 | 4.184595  | -3.852375 |
| 1  | -4.950492 | 3.775304  | -2.601920 |
| 6  | 3.452282  | 1.196391  | 0.731999  |
| 14 | 3.092592  | 2.081234  | 2.442894  |
| 6  | 2.822310  | 0.868956  | 3.886681  |
| 1  | 2.723676  | 1.464852  | 4.806182  |
| 1  | 1.900549  | 0.288647  | 3.770412  |
| 1  | 3.656962  | 0.173927  | 4.036693  |
| 6  | 4.641115  | 3.085255  | 2.950272  |
| 1  | 4.848120  | 3.932491  | 2.286142  |
| 1  | 4.488052  | 3.488786  | 3.961630  |
| 1  | 5.538140  | 2.452240  | 2.982402  |
| 6  | 1.597779  | 3.257345  | 2.489520  |
| 1  | 1.631338  | 4.053583  | 1.741342  |
| 1  | 0.655242  | 2.709072  | 2.367379  |
| 1  | 1.568501  | 3.732770  | 3.481618  |
| 14 | 4.066680  | 2.529703  | -0.570753 |
| 6  | 3.292163  | 4.258079  | -0.345757 |
| 1  | 3.692736  | 4.908792  | -1.136457 |
| 1  | 2.201240  | 4.234546  | -0.464179 |
| 1  | 3.522321  | 4.728040  | 0.616143  |
| 6  | 5.962058  | 2.730336  | -0.457003 |
| 1  | 6.279188  | 3.526664  | -1.145571 |
| 1  | 6.297830  | 3.006390  | 0.549341  |
| 1  | 6.490245  | 1.813622  | -0.750871 |
| 6  | 3.695768  | 2.124953  | -2.392408 |
| 1  | 4.245216  | 1.251603  | -2.751514 |
| 1  | 2.627010  | 1.956646  | -2.578742 |
| 1  | 4.004969  | 2.984175  | -3.005532 |
| 6  | 4.581043  | 0.129132  | 1.016072  |
| 1  | 4.376894  | -0.376862 | 1.966460  |
| 1  | 5.563986  | 0.609153  | 1.128149  |
| 6  | 4.672453  | -0.944664 | -0.092155 |
| 1  | 5.409670  | -1.705854 | 0.207412  |

|    |           |           |           |
|----|-----------|-----------|-----------|
| 1  | 5.082250  | -0.466674 | -0.996385 |
| 6  | 3.284734  | -1.630707 | -0.430566 |
| 14 | 2.839827  | -3.073400 | 0.819991  |
| 6  | 1.078303  | -3.727147 | 0.519977  |
| 1  | 0.359521  | -2.913988 | 0.358640  |
| 1  | 1.030883  | -4.402901 | -0.340033 |
| 1  | 0.743200  | -4.285519 | 1.404104  |
| 6  | 4.026074  | -4.563707 | 0.649708  |
| 1  | 3.810940  | -5.262267 | 1.471176  |
| 1  | 3.899902  | -5.112907 | -0.290290 |
| 1  | 5.080467  | -4.270637 | 0.736593  |
| 6  | 2.973833  | -2.592312 | 2.653611  |
| 1  | 4.006437  | -2.367013 | 2.950334  |
| 1  | 2.342393  | -1.740282 | 2.919124  |
| 1  | 2.642224  | -3.451912 | 3.254549  |
| 14 | 3.527646  | -2.397885 | -2.223623 |
| 6  | 5.245550  | -3.229971 | -2.326310 |
| 1  | 5.369293  | -4.074499 | -1.641510 |
| 1  | 5.383461  | -3.607434 | -3.350447 |
| 1  | 6.055426  | -2.514610 | -2.131787 |
| 6  | 2.258857  | -3.738594 | -2.708841 |
| 1  | 1.213610  | -3.431889 | -2.591518 |
| 1  | 2.411736  | -3.982156 | -3.769872 |
| 1  | 2.404174  | -4.663798 | -2.138233 |
| 6  | 3.594373  | -1.156215 | -3.672660 |
| 1  | 4.546298  | -0.611389 | -3.681414 |
| 1  | 3.552833  | -1.741870 | -4.602931 |
| 1  | 2.784021  | -0.424440 | -3.706931 |
| 1  | 0.452130  | 0.403592  | -3.045239 |
| 1  | 1.115078  | -1.209958 | -2.454522 |
| 1  | -1.846060 | -0.497425 | -2.691600 |
| 1  | -1.140711 | -2.013846 | -1.932599 |

-----  
1

A

Frequencies -- -215.7562

Red. masses -- 11.4088

Frc consts -- 0.3129

IR Inten -- 4.9064

Atom AN X Y Z

|    |    |       |       |       |
|----|----|-------|-------|-------|
| 1  | 6  | -0.09 | 0.28  | 0.56  |
| 2  | 6  | 0.10  | 0.15  | 0.47  |
| 3  | 32 | -0.06 | -0.05 | -0.08 |
| 4  | 14 | -0.01 | 0.00  | 0.19  |
| 5  | 32 | 0.05  | -0.03 | -0.11 |
| 6  | 6  | 0.04  | -0.03 | -0.04 |
| 7  | 14 | 0.01  | 0.00  | -0.02 |
| 8  | 6  | 0.00  | 0.00  | -0.01 |
| 9  | 1  | 0.00  | -0.01 | -0.01 |
| 10 | 1  | 0.01  | -0.01 | 0.00  |
| 11 | 1  | 0.00  | 0.00  | -0.01 |
| 12 | 6  | 0.01  | 0.00  | -0.01 |
| 13 | 1  | 0.01  | 0.00  | -0.01 |
| 14 | 1  | 0.02  | 0.01  | -0.01 |
| 15 | 1  | 0.02  | 0.00  | -0.01 |
| 16 | 6  | 0.02  | 0.01  | -0.01 |
| 17 | 1  | 0.04  | 0.02  | -0.02 |
| 18 | 1  | 0.02  | 0.02  | 0.03  |
| 19 | 1  | 0.02  | 0.00  | -0.01 |
| 20 | 14 | 0.00  | -0.01 | -0.01 |
| 21 | 6  | 0.01  | 0.00  | -0.01 |
| 22 | 1  | -0.03 | -0.01 | 0.00  |
| 23 | 1  | 0.02  | 0.06  | 0.01  |
| 24 | 1  | 0.05  | -0.02 | -0.03 |
| 25 | 6  | 0.00  | -0.01 | -0.01 |
| 26 | 1  | 0.01  | 0.00  | 0.00  |
| 27 | 1  | 0.00  | -0.02 | 0.00  |
| 28 | 1  | 0.00  | -0.01 | -0.02 |
| 29 | 6  | 0.00  | 0.00  | 0.00  |
| 30 | 1  | -0.01 | 0.00  | -0.01 |
| 31 | 1  | 0.00  | -0.01 | 0.00  |
| 32 | 1  | 0.00  | 0.00  | 0.00  |
| 33 | 6  | 0.05  | -0.01 | -0.01 |
| 34 | 1  | 0.07  | -0.02 | -0.01 |
| 35 | 1  | 0.05  | -0.01 | 0.02  |
| 36 | 6  | 0.03  | 0.00  | 0.00  |
| 37 | 1  | 0.01  | -0.01 | 0.01  |
| 38 | 1  | 0.03  | 0.00  | 0.00  |
| 39 | 6  | 0.02  | 0.02  | 0.01  |
| 40 | 14 | 0.00  | 0.00  | 0.00  |



|    |    |       |       |       |
|----|----|-------|-------|-------|
| 41 | 6  | 0.00  | 0.01  | 0.00  |
| 42 | 1  | 0.00  | 0.01  | 0.00  |
| 43 | 1  | 0.01  | 0.02  | -0.01 |
| 44 | 1  | 0.00  | 0.01  | 0.00  |
| 45 | 6  | 0.00  | 0.01  | 0.01  |
| 46 | 1  | 0.00  | 0.01  | 0.01  |
| 47 | 1  | 0.01  | 0.01  | 0.01  |
| 48 | 1  | 0.00  | 0.00  | 0.00  |
| 49 | 6  | 0.01  | -0.01 | -0.01 |
| 50 | 1  | 0.01  | 0.01  | 0.00  |
| 51 | 1  | -0.01 | -0.04 | -0.02 |
| 52 | 1  | 0.05  | -0.02 | 0.00  |
| 53 | 14 | 0.00  | 0.00  | 0.00  |
| 54 | 6  | 0.00  | 0.00  | 0.00  |
| 55 | 1  | 0.00  | 0.01  | 0.01  |
| 56 | 1  | 0.01  | -0.02 | 0.01  |
| 57 | 1  | 0.01  | 0.00  | -0.01 |
| 58 | 6  | 0.01  | 0.00  | 0.01  |
| 59 | 1  | 0.00  | 0.00  | 0.00  |
| 60 | 1  | 0.02  | -0.02 | 0.00  |
| 61 | 1  | 0.00  | -0.01 | 0.03  |
| 62 | 6  | 0.00  | 0.00  | 0.00  |
| 63 | 1  | 0.00  | 0.00  | 0.00  |
| 64 | 1  | 0.00  | 0.00  | 0.00  |
| 65 | 1  | 0.00  | 0.00  | 0.00  |
| 66 | 6  | -0.04 | 0.02  | -0.05 |
| 67 | 14 | -0.02 | 0.00  | -0.02 |
| 68 | 6  | 0.01  | 0.01  | -0.01 |
| 69 | 1  | 0.02  | 0.02  | -0.01 |
| 70 | 1  | 0.00  | 0.01  | 0.01  |
| 71 | 1  | 0.01  | 0.01  | -0.01 |
| 72 | 6  | -0.01 | 0.00  | -0.02 |
| 73 | 1  | -0.01 | 0.00  | -0.02 |
| 74 | 1  | -0.01 | -0.01 | -0.02 |
| 75 | 1  | -0.01 | -0.01 | -0.02 |
| 76 | 6  | -0.01 | 0.00  | -0.01 |
| 77 | 1  | -0.02 | 0.00  | -0.01 |
| 78 | 1  | -0.02 | 0.00  | 0.02  |
| 79 | 1  | -0.01 | 0.00  | -0.01 |
| 80 | 14 | 0.00  | 0.01  | -0.02 |

|     |    |       |       |       |
|-----|----|-------|-------|-------|
| 81  | 6  | 0.00  | 0.01  | -0.01 |
| 82  | 1  | 0.00  | 0.02  | 0.00  |
| 83  | 1  | 0.00  | 0.02  | -0.02 |
| 84  | 1  | 0.00  | 0.00  | 0.00  |
| 85  | 6  | 0.00  | 0.00  | 0.00  |
| 86  | 1  | 0.01  | 0.00  | 0.00  |
| 87  | 1  | -0.01 | 0.00  | 0.00  |
| 88  | 1  | -0.01 | 0.00  | 0.01  |
| 89  | 6  | 0.01  | 0.01  | -0.01 |
| 90  | 1  | 0.01  | 0.01  | -0.01 |
| 91  | 1  | 0.01  | 0.00  | -0.01 |
| 92  | 1  | 0.00  | 0.01  | -0.02 |
| 93  | 6  | -0.06 | 0.01  | -0.02 |
| 94  | 1  | -0.08 | 0.01  | -0.02 |
| 95  | 1  | -0.07 | 0.02  | 0.01  |
| 96  | 6  | -0.02 | 0.00  | 0.00  |
| 97  | 1  | 0.00  | 0.02  | 0.02  |
| 98  | 1  | -0.02 | 0.00  | 0.00  |
| 99  | 6  | 0.00  | -0.02 | 0.01  |
| 100 | 14 | 0.01  | -0.01 | 0.00  |
| 101 | 6  | 0.00  | 0.01  | 0.00  |
| 102 | 1  | 0.00  | 0.00  | -0.04 |
| 103 | 1  | 0.00  | -0.01 | 0.01  |
| 104 | 1  | -0.02 | 0.03  | 0.01  |
| 105 | 6  | 0.00  | -0.01 | 0.01  |
| 106 | 1  | 0.00  | -0.02 | 0.01  |
| 107 | 1  | 0.00  | -0.01 | 0.01  |
| 108 | 1  | 0.00  | -0.01 | 0.01  |
| 109 | 6  | -0.01 | 0.00  | 0.00  |
| 110 | 1  | -0.01 | 0.00  | 0.01  |
| 111 | 1  | 0.00  | 0.01  | 0.00  |
| 112 | 1  | -0.01 | 0.01  | 0.01  |
| 113 | 14 | -0.01 | 0.00  | 0.00  |
| 114 | 6  | 0.00  | 0.00  | 0.00  |
| 115 | 1  | 0.00  | 0.00  | 0.00  |
| 116 | 1  | 0.00  | 0.00  | 0.00  |
| 117 | 1  | 0.00  | 0.00  | 0.00  |
| 118 | 6  | 0.00  | -0.01 | 0.00  |
| 119 | 1  | 0.00  | -0.01 | 0.01  |
| 120 | 1  | -0.01 | 0.00  | 0.00  |

|     |   |       |       |       |
|-----|---|-------|-------|-------|
| 121 | 1 | 0.00  | -0.01 | 0.00  |
| 122 | 6 | -0.02 | 0.00  | 0.01  |
| 123 | 1 | -0.03 | 0.02  | 0.01  |
| 124 | 1 | -0.01 | 0.01  | 0.01  |
| 125 | 1 | -0.04 | -0.01 | 0.02  |
| 126 | 1 | 0.12  | 0.04  | 0.29  |
| 127 | 1 | -0.10 | -0.15 | -0.03 |
| 128 | 1 | 0.12  | 0.11  | 0.02  |
| 129 | 1 | -0.08 | 0.15  | 0.11  |

-----  
-----  
**Ge=Ge=Ge (TS)**  
-----

| Atomic<br>Number | Coordinates (Angstroms) |           |           |
|------------------|-------------------------|-----------|-----------|
|                  | X                       | Y         | Z         |
| 6                | 0.907917                | -0.953284 | 2.324744  |
| 6                | -0.372745               | -0.492359 | 2.604746  |
| 32               | -2.021451               | -0.009557 | 0.142134  |
| 32               | 0.001758                | 0.053813  | -1.329688 |
| 32               | 2.024429                | -0.057983 | 0.170944  |
| 6                | 3.657052                | -1.086992 | -0.585735 |
| 14               | 3.415400                | -1.797612 | -2.396334 |
| 6                | 3.337615                | -0.446079 | -3.734214 |
| 1                | 3.269084                | -0.950238 | -4.709532 |
| 1                | 2.459509                | 0.199414  | -3.635234 |
| 1                | 4.233192                | 0.187521  | -3.759036 |
| 6                | 4.891323                | -2.887292 | -2.935652 |
| 1                | 4.993824                | -3.811156 | -2.354785 |
| 1                | 4.737189                | -3.173292 | -3.986311 |
| 1                | 5.843369                | -2.342984 | -2.881465 |
| 6                | 1.845910                | -2.847622 | -2.641417 |
| 1                | 1.716277                | -3.630024 | -1.888380 |
| 1                | 0.934475                | -2.232739 | -2.652804 |
| 1                | 1.910141                | -3.336153 | -3.625469 |
| 14               | 4.261897                | -2.533807 | 0.592976  |
| 6                | 4.141489                | -2.262047 | 2.478039  |
| 1                | 4.609683                | -1.331753 | 2.815012  |
| 1                | 3.118616                | -2.293377 | 2.866327  |

|    |          |           |           |
|----|----------|-----------|-----------|
| 1  | 4.690705 | -3.090022 | 2.951002  |
| 6  | 3.309589 | -4.157196 | 0.290240  |
| 1  | 3.506959 | -4.596263 | -0.694386 |
| 1  | 3.617298 | -4.891799 | 1.047926  |
| 1  | 2.224196 | -4.020761 | 0.386909  |
| 6  | 6.129057 | -2.847445 | 0.335727  |
| 1  | 6.405663 | -3.775158 | 0.857493  |
| 1  | 6.422554 | -2.953806 | -0.712347 |
| 1  | 6.726861 | -2.037773 | 0.776222  |
| 6  | 4.742941 | 0.060158  | -0.617775 |
| 1  | 4.621425 | 0.666477  | -1.525869 |
| 1  | 5.761295 | -0.353304 | -0.659055 |
| 6  | 4.615992 | 0.995276  | 0.612023  |
| 1  | 5.361424 | 1.800317  | 0.538128  |
| 1  | 4.875689 | 0.419814  | 1.510326  |
| 6  | 3.161257 | 1.594521  | 0.753798  |
| 14 | 2.943733 | 3.113441  | -0.485536 |
| 6  | 1.481359 | 4.216942  | 0.037219  |
| 1  | 1.354649 | 5.013237  | -0.709800 |
| 1  | 0.543513 | 3.646928  | 0.068600  |
| 1  | 1.617466 | 4.694920  | 1.013239  |
| 6  | 4.549824 | 4.148582  | -0.529418 |
| 1  | 4.358405 | 5.062105  | -1.111094 |
| 1  | 4.921036 | 4.450190  | 0.453331  |
| 1  | 5.351392 | 3.601449  | -1.044357 |
| 6  | 2.641563 | 2.736494  | -2.324422 |
| 1  | 3.507495 | 2.271087  | -2.806895 |
| 1  | 1.767789 | 2.100808  | -2.500429 |
| 1  | 2.461415 | 3.698152  | -2.828085 |
| 14 | 2.932028 | 2.266940  | 2.577463  |
| 6  | 1.119169 | 2.662299  | 3.030373  |
| 1  | 0.410674 | 2.351538  | 2.255377  |
| 1  | 0.839230 | 2.161847  | 3.967152  |
| 1  | 0.990833 | 3.741588  | 3.184530  |
| 6  | 3.645504 | 1.113377  | 3.923774  |
| 1  | 4.722534 | 0.945901  | 3.791515  |
| 1  | 3.516121 | 1.629707  | 4.886770  |
| 1  | 3.161780 | 0.136105  | 4.016178  |
| 6  | 3.933101 | 3.869156  | 2.871697  |
| 1  | 3.585139 | 4.718946  | 2.274522  |

|    |           |           |           |
|----|-----------|-----------|-----------|
| 1  | 3.824881  | 4.144319  | 3.931218  |
| 1  | 5.004817  | 3.730088  | 2.677978  |
| 6  | -3.484071 | 1.203879  | -0.690075 |
| 14 | -3.098745 | 2.087249  | -2.393954 |
| 6  | -2.826880 | 0.879829  | -3.843683 |
| 1  | -2.728766 | 1.480347  | -4.760275 |
| 1  | -1.906079 | 0.296125  | -3.735501 |
| 1  | -3.661375 | 0.185369  | -3.996549 |
| 6  | -4.623181 | 3.115036  | -2.922284 |
| 1  | -4.833286 | 3.958330  | -2.254464 |
| 1  | -4.447921 | 3.524944  | -3.927351 |
| 1  | -5.525728 | 2.491476  | -2.975115 |
| 6  | -1.583639 | 3.241346  | -2.419622 |
| 1  | -1.630116 | 4.053180  | -1.688622 |
| 1  | -0.646371 | 2.691593  | -2.259138 |
| 1  | -1.517596 | 3.695975  | -3.419817 |
| 14 | -4.097023 | 2.542081  | 0.606533  |
| 6  | -3.301957 | 4.262507  | 0.385840  |
| 1  | -3.697542 | 4.917181  | 1.175777  |
| 1  | -2.211820 | 4.225594  | 0.509377  |
| 1  | -3.522143 | 4.737027  | -0.576160 |
| 6  | -5.989143 | 2.757689  | 0.479511  |
| 1  | -6.306920 | 3.555705  | 1.165680  |
| 1  | -6.314892 | 3.035599  | -0.529640 |
| 1  | -6.524830 | 1.843912  | 0.768671  |
| 6  | -3.736167 | 2.136880  | 2.430000  |
| 1  | -4.293440 | 1.268809  | 2.789274  |
| 1  | -2.669291 | 1.959872  | 2.618567  |
| 1  | -4.038898 | 2.999771  | 3.041250  |
| 6  | -4.611763 | 0.138211  | -0.986932 |
| 1  | -4.399619 | -0.364029 | -1.937716 |
| 1  | -5.594269 | 0.618183  | -1.105219 |
| 6  | -4.712913 | -0.942709 | 0.114943  |
| 1  | -5.443446 | -1.704653 | -0.198848 |
| 1  | -5.136415 | -0.470401 | 1.015814  |
| 6  | -3.326350 | -1.622720 | 0.470691  |
| 14 | -2.852316 | -3.063513 | -0.770130 |
| 6  | -1.084575 | -3.697624 | -0.453368 |
| 1  | -0.377127 | -2.880298 | -0.262123 |
| 1  | -1.043869 | -4.387865 | 0.396017  |

|    |           |           |           |
|----|-----------|-----------|-----------|
| 1  | -0.727487 | -4.237420 | -1.340692 |
| 6  | -4.017394 | -4.571013 | -0.609078 |
| 1  | -3.790122 | -5.264518 | -1.431545 |
| 1  | -3.886300 | -5.120619 | 0.329976  |
| 1  | -5.075292 | -4.292068 | -0.697873 |
| 6  | -2.979770 | -2.592767 | -2.607779 |
| 1  | -4.013045 | -2.378758 | -2.910178 |
| 1  | -2.355752 | -1.736553 | -2.876015 |
| 1  | -2.637197 | -3.452541 | -3.202418 |
| 14 | -3.582576 | -2.392309 | 2.260522  |
| 6  | -5.286692 | -3.253560 | 2.343297  |
| 1  | -5.376197 | -4.119289 | 1.679917  |
| 1  | -5.444684 | -3.604520 | 3.374035  |
| 1  | -6.103980 | -2.559392 | 2.107174  |
| 6  | -2.293300 | -3.707105 | 2.764555  |
| 1  | -1.253345 | -3.381676 | 2.650594  |
| 1  | -2.446720 | -3.945932 | 3.826642  |
| 1  | -2.418093 | -4.639064 | 2.200013  |
| 6  | -3.693570 | -1.148339 | 3.704926  |
| 1  | -4.647946 | -0.608066 | 3.687904  |
| 1  | -3.673743 | -1.733113 | 4.636469  |
| 1  | -2.887501 | -0.413442 | 3.760238  |
| 1  | -0.544635 | 0.461731  | 3.090266  |
| 1  | -1.214123 | -1.163451 | 2.540616  |
| 1  | 1.758489  | -0.463549 | 2.788234  |
| 1  | 1.046403  | -2.002894 | 2.070131  |

-----  
1

A

Frequencies -- -193.7942

Red. masses -- 11.2136

Frc consts -- 0.2481

IR Inten -- 1.2889

| Atom | AN | X     | Y     | Z     |
|------|----|-------|-------|-------|
| 1    | 6  | -0.13 | -0.26 | 0.56  |
| 2    | 6  | 0.05  | -0.11 | 0.47  |
| 3    | 32 | -0.06 | 0.04  | -0.08 |
| 4    | 32 | 0.00  | 0.00  | 0.10  |
| 5    | 32 | 0.06  | 0.01  | -0.11 |
| 6    | 6  | 0.05  | 0.03  | -0.05 |

|    |    |       |       |       |
|----|----|-------|-------|-------|
| 7  | 14 | 0.02  | 0.00  | -0.03 |
| 8  | 6  | 0.01  | 0.00  | -0.02 |
| 9  | 1  | 0.00  | 0.01  | -0.02 |
| 10 | 1  | 0.01  | 0.01  | -0.01 |
| 11 | 1  | 0.01  | 0.00  | -0.02 |
| 12 | 6  | 0.02  | 0.00  | -0.02 |
| 13 | 1  | 0.01  | 0.00  | -0.01 |
| 14 | 1  | 0.02  | -0.01 | -0.02 |
| 15 | 1  | 0.02  | -0.01 | -0.02 |
| 16 | 6  | 0.02  | -0.01 | -0.01 |
| 17 | 1  | 0.04  | -0.01 | -0.01 |
| 18 | 1  | 0.02  | -0.02 | 0.02  |
| 19 | 1  | 0.02  | 0.00  | -0.01 |
| 20 | 14 | 0.00  | 0.01  | -0.02 |
| 21 | 6  | 0.00  | 0.01  | -0.01 |
| 22 | 1  | -0.02 | 0.01  | -0.01 |
| 23 | 1  | 0.01  | -0.03 | 0.00  |
| 24 | 1  | 0.03  | 0.02  | -0.03 |
| 25 | 6  | 0.00  | 0.01  | -0.01 |
| 26 | 1  | 0.01  | 0.00  | 0.00  |
| 27 | 1  | 0.00  | 0.02  | 0.00  |
| 28 | 1  | 0.00  | 0.02  | -0.02 |
| 29 | 6  | 0.00  | 0.00  | -0.01 |
| 30 | 1  | -0.01 | 0.00  | -0.01 |
| 31 | 1  | 0.01  | 0.00  | 0.00  |
| 32 | 1  | 0.01  | 0.00  | 0.00  |
| 33 | 6  | 0.06  | 0.01  | -0.01 |
| 34 | 1  | 0.08  | 0.02  | -0.01 |
| 35 | 1  | 0.06  | 0.02  | 0.02  |
| 36 | 6  | 0.03  | 0.00  | 0.00  |
| 37 | 1  | 0.02  | 0.01  | 0.01  |
| 38 | 1  | 0.03  | 0.00  | -0.01 |
| 39 | 6  | 0.02  | -0.01 | 0.00  |
| 40 | 14 | 0.00  | 0.00  | -0.01 |
| 41 | 6  | 0.00  | -0.01 | 0.00  |
| 42 | 1  | 0.00  | -0.01 | 0.00  |
| 43 | 1  | 0.01  | -0.02 | -0.01 |
| 44 | 1  | 0.00  | -0.01 | 0.00  |
| 45 | 6  | 0.01  | 0.00  | 0.01  |
| 46 | 1  | 0.00  | 0.00  | 0.01  |

|    |    |       |       |       |
|----|----|-------|-------|-------|
| 47 | 1  | 0.01  | -0.01 | 0.01  |
| 48 | 1  | 0.00  | 0.00  | 0.00  |
| 49 | 6  | 0.02  | 0.02  | -0.01 |
| 50 | 1  | 0.01  | -0.01 | -0.01 |
| 51 | 1  | -0.01 | 0.05  | -0.02 |
| 52 | 1  | 0.06  | 0.03  | 0.00  |
| 53 | 14 | 0.00  | -0.01 | 0.00  |
| 54 | 6  | 0.01  | 0.00  | 0.00  |
| 55 | 1  | -0.01 | 0.00  | 0.02  |
| 56 | 1  | 0.02  | 0.02  | 0.01  |
| 57 | 1  | 0.01  | 0.00  | -0.01 |
| 58 | 6  | 0.01  | 0.00  | 0.00  |
| 59 | 1  | 0.01  | 0.00  | 0.00  |
| 60 | 1  | 0.01  | 0.01  | 0.00  |
| 61 | 1  | 0.01  | 0.00  | 0.02  |
| 62 | 6  | 0.00  | 0.00  | 0.00  |
| 63 | 1  | 0.00  | -0.01 | -0.01 |
| 64 | 1  | 0.00  | 0.00  | -0.01 |
| 65 | 1  | 0.00  | 0.00  | 0.00  |
| 66 | 6  | -0.04 | -0.02 | -0.05 |
| 67 | 14 | -0.02 | 0.00  | -0.02 |
| 68 | 6  | 0.01  | -0.01 | -0.01 |
| 69 | 1  | 0.02  | -0.02 | -0.02 |
| 70 | 1  | 0.01  | -0.01 | 0.01  |
| 71 | 1  | 0.01  | -0.01 | -0.01 |
| 72 | 6  | -0.01 | 0.00  | -0.03 |
| 73 | 1  | -0.01 | 0.00  | -0.02 |
| 74 | 1  | -0.02 | 0.01  | -0.02 |
| 75 | 1  | -0.02 | 0.00  | -0.02 |
| 76 | 6  | -0.02 | 0.01  | -0.01 |
| 77 | 1  | -0.03 | 0.01  | -0.02 |
| 78 | 1  | -0.02 | 0.01  | 0.01  |
| 79 | 1  | -0.02 | 0.00  | -0.01 |
| 80 | 14 | 0.00  | -0.01 | -0.02 |
| 81 | 6  | 0.00  | -0.01 | -0.01 |
| 82 | 1  | 0.00  | -0.02 | 0.00  |
| 83 | 1  | 0.00  | -0.02 | -0.02 |
| 84 | 1  | -0.01 | 0.00  | 0.00  |
| 85 | 6  | 0.00  | 0.00  | 0.00  |
| 86 | 1  | 0.01  | 0.00  | 0.00  |



|     |    |       |       |       |
|-----|----|-------|-------|-------|
| 87  | 1  | -0.01 | 0.00  | 0.00  |
| 88  | 1  | -0.01 | 0.00  | 0.00  |
| 89  | 6  | 0.00  | -0.01 | -0.02 |
| 90  | 1  | 0.01  | -0.02 | -0.01 |
| 91  | 1  | 0.01  | 0.00  | -0.01 |
| 92  | 1  | -0.01 | -0.01 | -0.02 |
| 93  | 6  | -0.06 | -0.01 | -0.02 |
| 94  | 1  | -0.08 | -0.01 | -0.02 |
| 95  | 1  | -0.07 | -0.02 | 0.01  |
| 96  | 6  | -0.02 | 0.00  | 0.00  |
| 97  | 1  | -0.01 | -0.02 | 0.01  |
| 98  | 1  | -0.02 | 0.00  | -0.01 |
| 99  | 6  | -0.01 | 0.02  | 0.01  |
| 100 | 14 | 0.00  | 0.01  | 0.00  |
| 101 | 6  | 0.00  | -0.01 | 0.00  |
| 102 | 1  | 0.00  | -0.01 | -0.04 |
| 103 | 1  | 0.00  | 0.00  | 0.01  |
| 104 | 1  | -0.02 | -0.03 | 0.00  |
| 105 | 6  | -0.01 | 0.01  | 0.01  |
| 106 | 1  | -0.01 | 0.02  | 0.01  |
| 107 | 1  | 0.00  | 0.01  | 0.01  |
| 108 | 1  | -0.01 | 0.01  | 0.01  |
| 109 | 6  | -0.01 | 0.00  | 0.00  |
| 110 | 1  | -0.01 | 0.00  | 0.00  |
| 111 | 1  | 0.00  | -0.01 | 0.00  |
| 112 | 1  | -0.01 | -0.01 | 0.01  |
| 113 | 14 | -0.01 | 0.00  | 0.00  |
| 114 | 6  | 0.00  | 0.00  | 0.00  |
| 115 | 1  | 0.00  | 0.00  | 0.00  |
| 116 | 1  | 0.00  | 0.00  | 0.00  |
| 117 | 1  | -0.01 | 0.00  | 0.00  |
| 118 | 6  | 0.00  | 0.01  | 0.00  |
| 119 | 1  | 0.00  | 0.02  | 0.00  |
| 120 | 1  | 0.00  | 0.01  | 0.00  |
| 121 | 1  | 0.00  | 0.01  | 0.00  |
| 122 | 6  | -0.03 | 0.00  | 0.01  |
| 123 | 1  | -0.05 | -0.03 | 0.01  |
| 124 | 1  | -0.02 | -0.01 | 0.00  |
| 125 | 1  | -0.05 | 0.02  | 0.02  |
| 126 | 1  | 0.09  | 0.00  | 0.26  |

|     |   |       |       |      |
|-----|---|-------|-------|------|
| 127 | 1 | -0.13 | 0.14  | 0.05 |
| 128 | 1 | 0.07  | -0.13 | 0.05 |
| 129 | 1 | -0.14 | -0.17 | 0.20 |

-----  
-----  
**Sn=Sn=Sn (TS)**  
-----

| Atomic<br>Number | Atomic<br>Type | Coordinates (Angstroms) |           |           |
|------------------|----------------|-------------------------|-----------|-----------|
|                  |                | X                       | Y         | Z         |
| 6                | 0              | 0.848802                | -0.788928 | 2.665506  |
| 6                | 0              | -0.484889               | -0.461551 | 2.805385  |
| 50               | 0              | -2.239780               | -0.005643 | 0.222893  |
| 50               | 0              | -0.007377               | 0.004968  | -1.651335 |
| 50               | 0              | 2.252553                | -0.080648 | 0.180189  |
| 6                | 0              | 4.099663                | -1.243404 | -0.353581 |
| 14               | 0              | 3.920813                | -2.174682 | -2.051208 |
| 6                | 0              | 3.982096                | -1.006027 | -3.552746 |
| 1                | 0              | 3.859543                | -1.613044 | -4.461762 |
| 1                | 0              | 3.181844                | -0.258472 | -3.546677 |
| 1                | 0              | 4.941197                | -0.479194 | -3.640687 |
| 6                | 0              | 5.324262                | -3.431766 | -2.378560 |
| 1                | 0              | 5.332691                | -4.269331 | -1.671674 |
| 1                | 0              | 5.188941                | -3.849931 | -3.386596 |
| 1                | 0              | 6.312178                | -2.953518 | -2.351511 |
| 6                | 0              | 2.270366                | -3.122886 | -2.190679 |
| 1                | 0              | 1.974126                | -3.626551 | -1.264866 |
| 1                | 0              | 1.451031                | -2.450005 | -2.488291 |
| 1                | 0              | 2.347397                | -3.888414 | -2.976537 |
| 14               | 0              | 4.604753                | -2.511311 | 1.038960  |
| 6                | 0              | 4.383262                | -1.945143 | 2.847553  |
| 1                | 0              | 4.984038                | -1.063517 | 3.095214  |
| 1                | 0              | 3.343121                | -1.741899 | 3.123224  |
| 1                | 0              | 4.731617                | -2.765602 | 3.492848  |
| 6                | 0              | 3.607354                | -4.134595 | 0.936442  |
| 1                | 0              | 3.759302                | -4.689001 | 0.003381  |
| 1                | 0              | 3.916251                | -4.789410 | 1.763773  |
| 1                | 0              | 2.528883                | -3.955924 | 1.048222  |
| 6                | 0              | 6.468047                | -2.915156 | 0.922254  |

|    |   |           |           |           |
|----|---|-----------|-----------|-----------|
| 1  | 0 | 6.706921  | -3.718978 | 1.633564  |
| 1  | 0 | 6.779043  | -3.245280 | -0.073457 |
| 1  | 0 | 7.080237  | -2.045834 | 1.198156  |
| 6  | 0 | 5.153434  | -0.068899 | -0.442207 |
| 1  | 0 | 5.095183  | 0.412885  | -1.427514 |
| 1  | 0 | 6.180873  | -0.457904 | -0.358241 |
| 6  | 0 | 4.955116  | 1.027154  | 0.647663  |
| 1  | 0 | 5.753627  | 1.777181  | 0.535887  |
| 1  | 0 | 5.115064  | 0.562203  | 1.629004  |
| 6  | 0 | 3.536385  | 1.726722  | 0.608617  |
| 14 | 0 | 3.486102  | 3.066334  | -0.818265 |
| 6  | 0 | 2.021801  | 4.269575  | -0.618622 |
| 1  | 0 | 1.990759  | 4.932571  | -1.494863 |
| 1  | 0 | 1.060036  | 3.742101  | -0.576757 |
| 1  | 0 | 2.099713  | 4.903627  | 0.271229  |
| 6  | 0 | 5.116198  | 4.064720  | -0.809940 |
| 1  | 0 | 5.020125  | 4.909356  | -1.507449 |
| 1  | 0 | 5.376241  | 4.469793  | 0.172567  |
| 1  | 0 | 5.957397  | 3.450566  | -1.158895 |
| 6  | 0 | 3.352551  | 2.447025  | -2.614078 |
| 1  | 0 | 4.203681  | 1.829361  | -2.919373 |
| 1  | 0 | 2.431294  | 1.885036  | -2.808007 |
| 1  | 0 | 3.340803  | 3.333451  | -3.266259 |
| 14 | 0 | 3.145217  | 2.580820  | 2.313425  |
| 6  | 0 | 1.284787  | 2.919157  | 2.551651  |
| 1  | 0 | 0.661239  | 2.068108  | 2.256245  |
| 1  | 0 | 1.080647  | 3.133405  | 3.610504  |
| 1  | 0 | 0.956797  | 3.788291  | 1.970517  |
| 6  | 0 | 3.764045  | 1.563205  | 3.805007  |
| 1  | 0 | 4.859673  | 1.488923  | 3.810945  |
| 1  | 0 | 3.471634  | 2.097083  | 4.720892  |
| 1  | 0 | 3.363320  | 0.548313  | 3.877463  |
| 6  | 0 | 4.046540  | 4.250152  | 2.558450  |
| 1  | 0 | 3.747384  | 5.024717  | 1.843641  |
| 1  | 0 | 3.810163  | 4.623188  | 3.565866  |
| 1  | 0 | 5.137148  | 4.136216  | 2.500062  |
| 6  | 0 | -3.904707 | 1.354607  | -0.446264 |
| 14 | 0 | -3.510468 | 2.367723  | -2.055396 |
| 6  | 0 | -3.447596 | 1.298172  | -3.632935 |
| 1  | 0 | -3.226792 | 1.960790  | -4.482778 |

|    |   |           |           |           |
|----|---|-----------|-----------|-----------|
| 1  | 0 | -2.660679 | 0.535225  | -3.604336 |
| 1  | 0 | -4.400315 | 0.798174  | -3.847357 |
| 6  | 0 | -4.861208 | 3.667534  | -2.437234 |
| 1  | 0 | -4.924328 | 4.461843  | -1.684746 |
| 1  | 0 | -4.636413 | 4.142031  | -3.403391 |
| 1  | 0 | -5.852069 | 3.201613  | -2.522467 |
| 6  | 0 | -1.834188 | 3.279440  | -1.979605 |
| 1  | 0 | -1.606259 | 3.692842  | -0.992671 |
| 1  | 0 | -1.003061 | 2.617072  | -2.272007 |
| 1  | 0 | -1.832478 | 4.111571  | -2.698378 |
| 14 | 0 | -4.442254 | 2.569519  | 0.977268  |
| 6  | 0 | -3.432491 | 4.189295  | 1.003218  |
| 1  | 0 | -3.813146 | 4.818851  | 1.820404  |
| 1  | 0 | -2.371205 | 3.996199  | 1.210886  |
| 1  | 0 | -3.496463 | 4.775341  | 0.079860  |
| 6  | 0 | -6.292664 | 3.011564  | 0.811678  |
| 1  | 0 | -6.557024 | 3.758320  | 1.574106  |
| 1  | 0 | -6.542309 | 3.431388  | -0.168811 |
| 1  | 0 | -6.933697 | 2.135390  | 0.977954  |
| 6  | 0 | -4.246394 | 1.899201  | 2.748875  |
| 1  | 0 | -4.867617 | 1.019563  | 2.942644  |
| 1  | 0 | -3.206703 | 1.640981  | 2.988879  |
| 1  | 0 | -4.558457 | 2.684971  | 3.452580  |
| 6  | 0 | -5.029658 | 0.290819  | -0.758145 |
| 1  | 0 | -4.879881 | -0.113870 | -1.765284 |
| 1  | 0 | -6.025254 | 0.763156  | -0.766780 |
| 6  | 0 | -5.080729 | -0.908819 | 0.232519  |
| 1  | 0 | -5.883938 | -1.587757 | -0.099918 |
| 1  | 0 | -5.402918 | -0.526024 | 1.213770  |
| 6  | 0 | -3.724470 | -1.712760 | 0.392006  |
| 14 | 0 | -3.461408 | -3.003480 | -1.046950 |
| 6  | 0 | -1.670016 | -3.649642 | -1.142564 |
| 1  | 0 | -1.037804 | -2.974449 | -1.734114 |
| 1  | 0 | -1.202793 | -3.779263 | -0.159508 |
| 1  | 0 | -1.662240 | -4.626640 | -1.649131 |
| 6  | 0 | -4.576994 | -4.547669 | -0.856228 |
| 1  | 0 | -4.531710 | -5.114300 | -1.797860 |
| 1  | 0 | -4.245856 | -5.217411 | -0.053313 |
| 1  | 0 | -5.628474 | -4.290614 | -0.675144 |
| 6  | 0 | -3.895487 | -2.350317 | -2.781479 |

|    |   |           |           |           |
|----|---|-----------|-----------|-----------|
| 1  | 0 | -4.961255 | -2.106189 | -2.881435 |
| 1  | 0 | -3.311461 | -1.471001 | -3.068166 |
| 1  | 0 | -3.672941 | -3.145555 | -3.508462 |
| 14 | 0 | -3.793911 | -2.638282 | 2.105108  |
| 6  | 0 | -5.430718 | -3.606991 | 2.301171  |
| 1  | 0 | -5.472904 | -4.526494 | 1.709640  |
| 1  | 0 | -5.545991 | -3.884825 | 3.359164  |
| 1  | 0 | -6.298237 | -2.989904 | 2.030432  |
| 6  | 0 | -2.363120 | -3.874844 | 2.353279  |
| 1  | 0 | -1.372216 | -3.416224 | 2.240142  |
| 1  | 0 | -2.420232 | -4.286308 | 3.371265  |
| 1  | 0 | -2.421636 | -4.718890 | 1.655164  |
| 6  | 0 | -3.833227 | -1.494738 | 3.635053  |
| 1  | 0 | -4.829670 | -1.054671 | 3.766324  |
| 1  | 0 | -3.637473 | -2.116241 | 4.521249  |
| 1  | 0 | -3.107117 | -0.679309 | 3.637670  |
| 1  | 0 | -0.795195 | 0.506541  | 3.188978  |
| 1  | 0 | -1.241721 | -1.233290 | 2.754447  |
| 1  | 0 | 1.615623  | -0.114714 | 3.032894  |
| 1  | 0 | 1.140674  | -1.824531 | 2.506488  |

-----  
1

A

Frequencies -- -113.1558

Red. masses -- 9.1673

Frc consts -- 0.0692

IR Inten -- 0.0877

| Atom | AN | X     | Y     | Z     |
|------|----|-------|-------|-------|
| 1    | 6  | -0.09 | -0.16 | 0.50  |
| 2    | 6  | -0.01 | -0.09 | 0.44  |
| 3    | 50 | -0.06 | 0.03  | -0.05 |
| 4    | 50 | 0.01  | 0.00  | 0.07  |
| 5    | 50 | 0.06  | -0.01 | -0.05 |
| 6    | 6  | 0.05  | 0.02  | -0.04 |
| 7    | 14 | 0.04  | 0.00  | -0.03 |
| 8    | 6  | 0.02  | 0.01  | -0.03 |
| 9    | 1  | 0.01  | 0.01  | -0.03 |
| 10   | 1  | 0.01  | 0.00  | -0.02 |
| 11   | 1  | 0.01  | 0.01  | -0.03 |
| 12   | 6  | 0.03  | 0.00  | -0.03 |

|    |    |      |       |       |
|----|----|------|-------|-------|
| 13 | 1  | 0.03 | 0.00  | -0.02 |
| 14 | 1  | 0.03 | -0.01 | -0.03 |
| 15 | 1  | 0.03 | -0.01 | -0.03 |
| 16 | 6  | 0.04 | 0.00  | -0.02 |
| 17 | 1  | 0.04 | 0.00  | -0.01 |
| 18 | 1  | 0.03 | -0.01 | -0.01 |
| 19 | 1  | 0.04 | 0.00  | -0.01 |
| 20 | 14 | 0.02 | 0.01  | -0.03 |
| 21 | 6  | 0.02 | 0.00  | -0.02 |
| 22 | 1  | 0.01 | 0.01  | -0.02 |
| 23 | 1  | 0.02 | -0.01 | -0.02 |
| 24 | 1  | 0.03 | 0.00  | -0.03 |
| 25 | 6  | 0.01 | 0.01  | -0.02 |
| 26 | 1  | 0.02 | 0.00  | -0.02 |
| 27 | 1  | 0.00 | 0.02  | -0.01 |
| 28 | 1  | 0.01 | 0.02  | -0.04 |
| 29 | 6  | 0.02 | 0.00  | -0.02 |
| 30 | 1  | 0.01 | -0.01 | -0.02 |
| 31 | 1  | 0.02 | 0.00  | -0.02 |
| 32 | 1  | 0.02 | -0.01 | -0.01 |
| 33 | 6  | 0.06 | 0.01  | -0.02 |
| 34 | 1  | 0.08 | 0.02  | -0.02 |
| 35 | 1  | 0.06 | 0.01  | 0.00  |
| 36 | 6  | 0.03 | 0.01  | -0.01 |
| 37 | 1  | 0.03 | 0.01  | 0.00  |
| 38 | 1  | 0.03 | 0.00  | -0.01 |
| 39 | 6  | 0.03 | 0.00  | -0.01 |
| 40 | 14 | 0.01 | 0.00  | -0.01 |
| 41 | 6  | 0.01 | 0.00  | 0.00  |
| 42 | 1  | 0.02 | 0.01  | 0.01  |
| 43 | 1  | 0.01 | -0.01 | -0.02 |
| 44 | 1  | 0.00 | -0.01 | 0.01  |
| 45 | 6  | 0.01 | 0.00  | 0.00  |
| 46 | 1  | 0.01 | 0.01  | 0.00  |
| 47 | 1  | 0.01 | 0.00  | 0.00  |
| 48 | 1  | 0.01 | 0.01  | -0.01 |
| 49 | 6  | 0.01 | 0.01  | -0.01 |
| 50 | 1  | 0.00 | -0.01 | -0.01 |
| 51 | 1  | 0.00 | 0.03  | -0.01 |
| 52 | 1  | 0.03 | 0.01  | -0.01 |

|    |    |       |       |       |
|----|----|-------|-------|-------|
| 53 | 14 | 0.02  | -0.01 | -0.01 |
| 54 | 6  | 0.02  | -0.03 | 0.01  |
| 55 | 1  | 0.03  | -0.08 | 0.12  |
| 56 | 1  | 0.05  | 0.07  | 0.00  |
| 57 | 1  | -0.03 | -0.10 | -0.06 |
| 58 | 6  | 0.04  | 0.01  | -0.01 |
| 59 | 1  | 0.04  | 0.04  | 0.00  |
| 60 | 1  | 0.01  | -0.01 | -0.01 |
| 61 | 1  | 0.08  | -0.01 | -0.02 |
| 62 | 6  | 0.00  | 0.00  | -0.01 |
| 63 | 1  | -0.01 | 0.00  | -0.01 |
| 64 | 1  | 0.00  | 0.00  | -0.01 |
| 65 | 1  | 0.00  | 0.01  | -0.01 |
| 66 | 6  | -0.04 | -0.01 | -0.04 |
| 67 | 14 | -0.03 | 0.00  | -0.03 |
| 68 | 6  | -0.01 | 0.00  | -0.02 |
| 69 | 1  | 0.00  | -0.01 | -0.03 |
| 70 | 1  | 0.00  | 0.00  | -0.01 |
| 71 | 1  | 0.00  | -0.02 | -0.03 |
| 72 | 6  | -0.04 | 0.00  | -0.03 |
| 73 | 1  | -0.03 | 0.00  | -0.03 |
| 74 | 1  | -0.04 | 0.00  | -0.03 |
| 75 | 1  | -0.04 | 0.00  | -0.03 |
| 76 | 6  | -0.04 | 0.02  | -0.02 |
| 77 | 1  | -0.04 | 0.01  | -0.01 |
| 78 | 1  | -0.03 | 0.04  | -0.02 |
| 79 | 1  | -0.06 | 0.03  | 0.00  |
| 80 | 14 | -0.01 | -0.01 | -0.02 |
| 81 | 6  | -0.01 | -0.01 | -0.02 |
| 82 | 1  | 0.00  | -0.02 | -0.01 |
| 83 | 1  | -0.01 | -0.01 | -0.03 |
| 84 | 1  | -0.02 | 0.00  | -0.01 |
| 85 | 6  | -0.01 | 0.00  | 0.00  |
| 86 | 1  | 0.00  | 0.00  | 0.00  |
| 87 | 1  | -0.02 | 0.00  | 0.00  |
| 88 | 1  | -0.02 | 0.00  | 0.01  |
| 89 | 6  | 0.00  | -0.01 | -0.02 |
| 90 | 1  | 0.03  | -0.02 | -0.02 |
| 91 | 1  | 0.01  | 0.03  | -0.02 |
| 92 | 1  | -0.02 | -0.01 | -0.03 |

|     |    |       |       |       |
|-----|----|-------|-------|-------|
| 93  | 6  | -0.05 | 0.00  | -0.02 |
| 94  | 1  | -0.07 | -0.01 | -0.02 |
| 95  | 1  | -0.06 | -0.01 | 0.00  |
| 96  | 6  | -0.03 | 0.00  | -0.01 |
| 97  | 1  | -0.02 | -0.01 | -0.01 |
| 98  | 1  | -0.04 | 0.00  | -0.02 |
| 99  | 6  | -0.02 | 0.01  | 0.00  |
| 100 | 14 | -0.01 | 0.00  | 0.00  |
| 101 | 6  | -0.02 | -0.03 | 0.01  |
| 102 | 1  | 0.00  | -0.04 | 0.04  |
| 103 | 1  | -0.03 | -0.06 | 0.02  |
| 104 | 1  | -0.04 | -0.03 | 0.00  |
| 105 | 6  | -0.02 | 0.01  | 0.00  |
| 106 | 1  | -0.03 | 0.01  | 0.00  |
| 107 | 1  | -0.02 | 0.00  | 0.00  |
| 108 | 1  | -0.02 | 0.01  | 0.01  |
| 109 | 6  | 0.00  | 0.00  | 0.00  |
| 110 | 1  | 0.00  | -0.01 | -0.01 |
| 111 | 1  | 0.00  | 0.00  | 0.00  |
| 112 | 1  | 0.01  | 0.00  | 0.00  |
| 113 | 14 | -0.02 | 0.01  | 0.00  |
| 114 | 6  | -0.01 | -0.01 | -0.01 |
| 115 | 1  | 0.00  | -0.02 | 0.00  |
| 116 | 1  | -0.01 | 0.00  | 0.00  |
| 117 | 1  | -0.02 | -0.02 | -0.01 |
| 118 | 6  | -0.01 | 0.02  | 0.01  |
| 119 | 1  | -0.01 | 0.03  | -0.01 |
| 120 | 1  | 0.00  | 0.04  | 0.01  |
| 121 | 1  | -0.01 | 0.01  | 0.02  |
| 122 | 6  | -0.06 | 0.00  | 0.01  |
| 123 | 1  | -0.09 | -0.06 | 0.02  |
| 124 | 1  | -0.02 | 0.01  | 0.00  |
| 125 | 1  | -0.11 | 0.04  | 0.01  |
| 126 | 1  | 0.00  | -0.02 | 0.27  |
| 127 | 1  | -0.10 | 0.02  | 0.17  |
| 128 | 1  | 0.01  | -0.12 | 0.22  |
| 129 | 1  | -0.09 | -0.13 | 0.26  |

-----  
-----



## Pb=Pb=Pb (TS)

| Atomic<br>Number | Coordinates (Angstroms) |           |           |
|------------------|-------------------------|-----------|-----------|
|                  | X                       | Y         | Z         |
| 6                | 0.882878                | -0.622617 | 2.730696  |
| 6                | -0.469902               | -0.375288 | 2.891641  |
| 82               | -2.232167               | -0.007926 | 0.376826  |
| 82               | -0.026055               | 0.007427  | -1.731869 |
| 82               | 2.243126                | -0.067986 | 0.257214  |
| 6                | 4.059958                | -1.483924 | -0.134383 |
| 14               | 3.787336                | -2.502972 | -1.766965 |
| 6                | 4.183073                | -1.502249 | -3.336795 |
| 1                | 4.000924                | -2.146287 | -4.209245 |
| 1                | 3.555189                | -0.612879 | -3.444572 |
| 1                | 5.233624                | -1.185930 | -3.378775 |
| 6                | 4.888167                | -4.059626 | -1.936189 |
| 1                | 4.681230                | -4.835328 | -1.190317 |
| 1                | 4.707395                | -4.497998 | -2.928400 |
| 1                | 5.954854                | -3.806986 | -1.878979 |
| 6                | 1.980337                | -3.100220 | -1.983335 |
| 1                | 1.487542                | -3.386338 | -1.047755 |
| 1                | 1.375291                | -2.322090 | -2.479790 |
| 1                | 1.955264                | -3.974664 | -2.649260 |
| 14               | 4.362236                | -2.672448 | 1.367981  |
| 6                | 4.334130                | -1.901659 | 3.113758  |
| 1                | 5.088828                | -1.118408 | 3.247986  |
| 1                | 3.362037                | -1.491915 | 3.405379  |
| 1                | 4.570382                | -2.704898 | 3.827339  |
| 6                | 3.046198                | -4.054265 | 1.420509  |
| 1                | 3.052199                | -4.688781 | 0.527022  |
| 1                | 3.234789                | -4.704260 | 2.286596  |
| 1                | 2.031399                | -3.647584 | 1.535153  |
| 6                | 6.100006                | -3.460592 | 1.270521  |
| 1                | 6.239256                | -4.136488 | 2.126505  |
| 1                | 6.256701                | -4.041088 | 0.357473  |
| 1                | 6.887582                | -2.696310 | 1.326783  |
| 6                | 5.202305                | -0.408847 | -0.285184 |
| 1                | 5.208687                | -0.010766 | -1.308185 |

|    |           |           |           |
|----|-----------|-----------|-----------|
| 1  | 6.191402  | -0.876752 | -0.138986 |
| 6  | 5.104255  | 0.804422  | 0.695551  |
| 1  | 5.989248  | 1.439848  | 0.525554  |
| 1  | 5.203726  | 0.428116  | 1.721154  |
| 6  | 3.784807  | 1.660033  | 0.561615  |
| 14 | 3.875982  | 2.858556  | -0.969564 |
| 6  | 2.479496  | 4.156056  | -0.950045 |
| 1  | 2.526293  | 4.737282  | -1.881734 |
| 1  | 1.486219  | 3.690661  | -0.906847 |
| 1  | 2.559214  | 4.863301  | -0.117388 |
| 6  | 5.560748  | 3.762585  | -0.969461 |
| 1  | 5.555447  | 4.540146  | -1.746850 |
| 1  | 5.791441  | 4.245442  | -0.014656 |
| 1  | 6.380596  | 3.071029  | -1.206659 |
| 6  | 3.781765  | 2.073801  | -2.703589 |
| 1  | 4.616475  | 1.394978  | -2.908856 |
| 1  | 2.844560  | 1.531565  | -2.878480 |
| 1  | 3.833960  | 2.888450  | -3.441259 |
| 14 | 3.393954  | 2.658798  | 2.181010  |
| 6  | 1.539405  | 3.077901  | 2.338827  |
| 1  | 0.897096  | 2.195201  | 2.230736  |
| 1  | 1.342203  | 3.518980  | 3.326258  |
| 1  | 1.227032  | 3.809308  | 1.584380  |
| 6  | 3.923140  | 1.725803  | 3.759719  |
| 1  | 5.015219  | 1.623762  | 3.813279  |
| 1  | 3.610349  | 2.322327  | 4.629000  |
| 1  | 3.492660  | 0.727010  | 3.876952  |
| 6  | 4.340303  | 4.314692  | 2.346380  |
| 1  | 4.109816  | 5.041310  | 1.559596  |
| 1  | 4.062312  | 4.771573  | 3.307485  |
| 1  | 5.427488  | 4.160389  | 2.360052  |
| 6  | -3.868070 | 1.559798  | -0.291418 |
| 14 | -3.284005 | 2.616862  | -1.799778 |
| 6  | -3.363959 | 1.686713  | -3.462593 |
| 1  | -2.985077 | 2.353272  | -4.251168 |
| 1  | -2.751828 | 0.777287  | -3.478160 |
| 1  | -4.388883 | 1.405216  | -3.735802 |
| 6  | -4.349901 | 4.176048  | -2.115995 |
| 1  | -4.295539 | 4.913575  | -1.307388 |
| 1  | -3.998091 | 4.664930  | -3.036172 |

|    |           |           |           |
|----|-----------|-----------|-----------|
| 1  | -5.405839 | 3.914344  | -2.265588 |
| 6  | -1.469717 | 3.209675  | -1.610341 |
| 1  | -1.137083 | 3.247056  | -0.567536 |
| 1  | -0.774680 | 2.568185  | -2.184143 |
| 1  | -1.346096 | 4.217480  | -2.031678 |
| 14 | -4.325721 | 2.723949  | 1.186579  |
| 6  | -3.048218 | 4.127700  | 1.400732  |
| 1  | -3.361483 | 4.768955  | 2.237002  |
| 1  | -2.057963 | 3.724420  | 1.655669  |
| 1  | -2.933246 | 4.769624  | 0.520148  |
| 6  | -6.062325 | 3.485575  | 0.949937  |
| 1  | -6.277541 | 4.174536  | 1.779502  |
| 1  | -6.157610 | 4.047211  | 0.014657  |
| 1  | -6.840852 | 2.710484  | 0.959437  |
| 6  | -4.385237 | 1.912440  | 2.908197  |
| 1  | -5.175828 | 1.160229  | 2.998622  |
| 1  | -3.435248 | 1.438403  | 3.183711  |
| 1  | -4.588453 | 2.695396  | 3.653554  |
| 6  | -5.030963 | 0.582371  | -0.696647 |
| 1  | -4.867207 | 0.222964  | -1.718408 |
| 1  | -5.998543 | 1.114275  | -0.715960 |
| 6  | -5.209492 | -0.668066 | 0.218459  |
| 1  | -6.078385 | -1.233397 | -0.163692 |
| 1  | -5.507088 | -0.314864 | 1.217843  |
| 6  | -3.955701 | -1.621305 | 0.338880  |
| 14 | -3.779588 | -2.826869 | -1.170796 |
| 6  | -2.064717 | -3.648216 | -1.290264 |
| 1  | -1.288903 | -2.920233 | -1.559111 |
| 1  | -1.757754 | -4.142925 | -0.363403 |
| 1  | -2.086387 | -4.407160 | -2.085479 |
| 6  | -5.047299 | -4.261087 | -1.110171 |
| 1  | -5.051607 | -4.763100 | -2.088270 |
| 1  | -4.796659 | -5.014537 | -0.353440 |
| 1  | -6.067568 | -3.907790 | -0.913538 |
| 6  | -4.076554 | -2.014362 | -2.868068 |
| 1  | -5.093988 | -1.616394 | -2.973900 |
| 1  | -3.368843 | -1.204700 | -3.073708 |
| 1  | -3.939100 | -2.780334 | -3.645360 |
| 14 | -4.081823 | -2.607175 | 2.004508  |
| 6  | -5.778066 | -3.473771 | 2.175531  |

|   |           |           |          |
|---|-----------|-----------|----------|
| 1 | -5.900517 | -4.327619 | 1.501625 |
| 1 | -5.891116 | -3.840675 | 3.206026 |
| 1 | -6.602957 | -2.773620 | 1.985252 |
| 6 | -2.725878 | -3.935540 | 2.198273 |
| 1 | -1.717531 | -3.541681 | 2.012473 |
| 1 | -2.746624 | -4.323301 | 3.226480 |
| 1 | -2.879268 | -4.788666 | 1.525369 |
| 6 | -4.009246 | -1.529629 | 3.578648 |
| 1 | -4.938225 | -0.964694 | 3.719301 |
| 1 | -3.906653 | -2.203536 | 4.441829 |
| 1 | -3.180716 | -0.817213 | 3.617308 |
| 1 | -0.827684 | 0.586728  | 3.249887 |
| 1 | -1.170970 | -1.201912 | 2.917930 |
| 1 | 1.606143  | 0.116745  | 3.062523 |
| 1 | 1.229946  | -1.650018 | 2.647968 |

-----  
1

A

Frequencies -- -76.9166

Red. masses -- 8.7738

Frc consts -- 0.0306

IR Inten -- 2.5071

| Atom | AN | X     | Y     | Z     |
|------|----|-------|-------|-------|
| 1    | 6  | -0.03 | -0.16 | 0.43  |
| 2    | 6  | 0.04  | -0.09 | 0.43  |
| 3    | 82 | -0.06 | 0.02  | 0.00  |
| 4    | 82 | 0.01  | 0.00  | 0.04  |
| 5    | 82 | 0.06  | -0.01 | -0.02 |
| 6    | 6  | 0.05  | 0.01  | -0.04 |
| 7    | 14 | 0.04  | 0.01  | -0.03 |
| 8    | 6  | 0.03  | 0.00  | -0.03 |
| 9    | 1  | 0.02  | 0.00  | -0.03 |
| 10   | 1  | 0.04  | 0.01  | -0.03 |
| 11   | 1  | 0.04  | -0.01 | -0.04 |
| 12   | 6  | 0.02  | -0.01 | -0.03 |
| 13   | 1  | 0.01  | 0.00  | -0.03 |
| 14   | 1  | 0.00  | -0.01 | -0.03 |
| 15   | 1  | 0.02  | -0.02 | -0.04 |
| 16   | 6  | 0.03  | 0.02  | -0.01 |
| 17   | 1  | 0.02  | 0.07  | 0.00  |

|    |    |       |       |       |
|----|----|-------|-------|-------|
| 18 | 1  | 0.04  | 0.01  | -0.04 |
| 19 | 1  | 0.01  | 0.00  | 0.03  |
| 20 | 14 | 0.04  | 0.01  | -0.03 |
| 21 | 6  | 0.06  | 0.00  | -0.03 |
| 22 | 1  | 0.04  | 0.01  | -0.03 |
| 23 | 1  | 0.06  | -0.03 | 0.01  |
| 24 | 1  | 0.09  | -0.01 | -0.04 |
| 25 | 6  | 0.02  | 0.02  | -0.03 |
| 26 | 1  | 0.01  | 0.02  | -0.02 |
| 27 | 1  | 0.01  | 0.02  | -0.02 |
| 28 | 1  | 0.02  | 0.03  | -0.03 |
| 29 | 6  | 0.03  | -0.01 | -0.03 |
| 30 | 1  | 0.01  | -0.02 | -0.04 |
| 31 | 1  | 0.02  | -0.01 | -0.04 |
| 32 | 1  | 0.03  | -0.02 | -0.02 |
| 33 | 6  | 0.06  | 0.01  | -0.03 |
| 34 | 1  | 0.07  | 0.01  | -0.03 |
| 35 | 1  | 0.06  | 0.01  | -0.01 |
| 36 | 6  | 0.05  | 0.01  | -0.02 |
| 37 | 1  | 0.04  | 0.01  | -0.02 |
| 38 | 1  | 0.05  | 0.01  | -0.02 |
| 39 | 6  | 0.04  | 0.00  | -0.02 |
| 40 | 14 | 0.02  | 0.01  | -0.02 |
| 41 | 6  | 0.00  | -0.02 | -0.01 |
| 42 | 1  | 0.00  | 0.00  | 0.00  |
| 43 | 1  | 0.01  | -0.04 | -0.03 |
| 44 | 1  | -0.02 | -0.03 | 0.00  |
| 45 | 6  | 0.01  | 0.02  | -0.01 |
| 46 | 1  | 0.01  | 0.03  | -0.01 |
| 47 | 1  | 0.00  | 0.02  | -0.01 |
| 48 | 1  | 0.02  | 0.03  | -0.01 |
| 49 | 6  | 0.03  | 0.01  | -0.02 |
| 50 | 1  | 0.03  | 0.01  | -0.01 |
| 51 | 1  | 0.03  | 0.01  | -0.02 |
| 52 | 1  | 0.04  | 0.01  | -0.02 |
| 53 | 14 | 0.02  | -0.01 | -0.01 |
| 54 | 6  | 0.01  | -0.06 | 0.00  |
| 55 | 1  | 0.04  | -0.10 | 0.08  |
| 56 | 1  | 0.02  | -0.01 | -0.02 |
| 57 | 1  | -0.03 | -0.13 | -0.04 |

|    |    |       |       |       |
|----|----|-------|-------|-------|
| 58 | 6  | 0.06  | 0.01  | -0.02 |
| 59 | 1  | 0.07  | 0.05  | -0.02 |
| 60 | 1  | 0.03  | -0.01 | -0.02 |
| 61 | 1  | 0.11  | -0.01 | -0.02 |
| 62 | 6  | -0.01 | 0.01  | -0.02 |
| 63 | 1  | -0.03 | 0.01  | -0.02 |
| 64 | 1  | -0.02 | 0.00  | -0.02 |
| 65 | 1  | -0.01 | 0.03  | -0.02 |
| 66 | 6  | -0.05 | -0.01 | -0.05 |
| 67 | 14 | -0.04 | 0.00  | -0.04 |
| 68 | 6  | -0.01 | -0.01 | -0.04 |
| 69 | 1  | 0.00  | -0.01 | -0.04 |
| 70 | 1  | -0.01 | -0.01 | -0.02 |
| 71 | 1  | -0.01 | -0.01 | -0.05 |
| 72 | 6  | -0.03 | 0.00  | -0.05 |
| 73 | 1  | -0.03 | 0.00  | -0.04 |
| 74 | 1  | -0.03 | 0.00  | -0.04 |
| 75 | 1  | -0.03 | 0.00  | -0.05 |
| 76 | 6  | -0.04 | 0.00  | -0.02 |
| 77 | 1  | -0.05 | -0.01 | -0.02 |
| 78 | 1  | -0.03 | 0.00  | -0.01 |
| 79 | 1  | -0.04 | 0.00  | -0.02 |
| 80 | 14 | -0.03 | -0.01 | -0.04 |
| 81 | 6  | -0.03 | -0.01 | -0.04 |
| 82 | 1  | -0.02 | -0.01 | -0.04 |
| 83 | 1  | -0.02 | -0.01 | -0.05 |
| 84 | 1  | -0.03 | 0.00  | -0.04 |
| 85 | 6  | -0.03 | 0.00  | -0.02 |
| 86 | 1  | -0.01 | 0.01  | -0.03 |
| 87 | 1  | -0.04 | -0.01 | -0.03 |
| 88 | 1  | -0.03 | 0.00  | -0.01 |
| 89 | 6  | -0.01 | 0.00  | -0.04 |
| 90 | 1  | 0.02  | -0.03 | -0.03 |
| 91 | 1  | 0.01  | 0.04  | -0.02 |
| 92 | 1  | -0.04 | 0.00  | -0.05 |
| 93 | 6  | -0.06 | 0.00  | -0.04 |
| 94 | 1  | -0.07 | -0.01 | -0.04 |
| 95 | 1  | -0.06 | -0.01 | -0.03 |
| 96 | 6  | -0.05 | 0.00  | -0.03 |
| 97 | 1  | -0.04 | -0.01 | -0.03 |

|     |    |       |       |       |
|-----|----|-------|-------|-------|
| 98  | 1  | -0.05 | 0.00  | -0.04 |
| 99  | 6  | -0.04 | 0.00  | -0.02 |
| 100 | 14 | -0.02 | 0.00  | -0.02 |
| 101 | 6  | -0.02 | 0.00  | 0.00  |
| 102 | 1  | -0.02 | 0.01  | 0.01  |
| 103 | 1  | -0.02 | 0.00  | 0.00  |
| 104 | 1  | -0.01 | 0.00  | 0.00  |
| 105 | 6  | -0.01 | -0.01 | -0.02 |
| 106 | 1  | -0.01 | -0.01 | -0.02 |
| 107 | 1  | -0.01 | -0.01 | -0.02 |
| 108 | 1  | -0.02 | -0.01 | -0.02 |
| 109 | 6  | -0.01 | -0.01 | -0.02 |
| 110 | 1  | -0.01 | -0.02 | -0.03 |
| 111 | 1  | -0.02 | 0.00  | -0.01 |
| 112 | 1  | 0.01  | -0.01 | -0.02 |
| 113 | 14 | -0.03 | 0.01  | -0.02 |
| 114 | 6  | -0.02 | -0.02 | -0.02 |
| 115 | 1  | -0.01 | -0.03 | -0.01 |
| 116 | 1  | -0.02 | -0.01 | -0.02 |
| 117 | 1  | -0.03 | -0.03 | -0.03 |
| 118 | 6  | -0.01 | 0.03  | 0.00  |
| 119 | 1  | -0.02 | 0.04  | 0.00  |
| 120 | 1  | -0.02 | 0.03  | 0.00  |
| 121 | 1  | 0.00  | 0.02  | 0.00  |
| 122 | 6  | -0.07 | 0.01  | -0.02 |
| 123 | 1  | -0.10 | -0.04 | -0.01 |
| 124 | 1  | -0.02 | 0.01  | -0.02 |
| 125 | 1  | -0.11 | 0.06  | -0.02 |
| 126 | 1  | 0.05  | -0.03 | 0.30  |
| 127 | 1  | -0.07 | 0.00  | 0.21  |
| 128 | 1  | 0.06  | -0.14 | 0.19  |
| 129 | 1  | -0.05 | -0.14 | 0.19  |

-----  
-----  
C=C=C (pro)

-----  
-----  
Atomic Atomic Coordinates (Angstroms)  
Number Type X Y Z  
-----

|    |   |           |           |           |
|----|---|-----------|-----------|-----------|
| 6  | 0 | 0.719524  | 0.287825  | -1.516815 |
| 6  | 0 | -0.697125 | -0.292521 | -1.524162 |
| 6  | 0 | -1.274116 | 0.178658  | -0.154112 |
| 6  | 0 | -0.005416 | 0.004175  | 0.785579  |
| 6  | 0 | 1.276504  | -0.176752 | -0.136447 |
| 6  | 0 | 2.610426  | 0.680037  | 0.417846  |
| 14 | 0 | 2.634133  | 1.652224  | 2.158918  |
| 6  | 0 | 2.026051  | 0.678048  | 3.672917  |
| 1  | 0 | 2.045678  | 1.364748  | 4.531936  |
| 1  | 0 | 1.011098  | 0.297605  | 3.554321  |
| 1  | 0 | 2.686441  | -0.162276 | 3.914703  |
| 6  | 0 | 4.471498  | 1.986273  | 2.596578  |
| 1  | 0 | 4.982621  | 2.646027  | 1.886399  |
| 1  | 0 | 4.478311  | 2.494289  | 3.572576  |
| 1  | 0 | 5.064923  | 1.070418  | 2.704259  |
| 6  | 0 | 1.862673  | 3.386434  | 2.274810  |
| 1  | 0 | 0.973300  | 3.527142  | 1.666911  |
| 1  | 0 | 1.574496  | 3.559045  | 3.319999  |
| 1  | 0 | 2.588735  | 4.157904  | 1.999438  |
| 14 | 0 | 3.550527  | 1.875860  | -0.928409 |
| 6  | 0 | 3.211735  | 1.716844  | -2.805945 |
| 1  | 0 | 3.358292  | 0.702536  | -3.190343 |
| 1  | 0 | 2.224518  | 2.065022  | -3.119034 |
| 1  | 0 | 3.959500  | 2.358811  | -3.295097 |
| 6  | 0 | 3.390099  | 3.751625  | -0.594061 |
| 1  | 0 | 4.044407  | 4.072601  | 0.225125  |
| 1  | 0 | 3.716080  | 4.278432  | -1.502168 |
| 1  | 0 | 2.377597  | 4.091383  | -0.362178 |
| 6  | 0 | 5.440675  | 1.559358  | -0.873827 |
| 1  | 0 | 5.912574  | 2.299293  | -1.537055 |
| 1  | 0 | 5.887500  | 1.677408  | 0.118759  |
| 1  | 0 | 5.709080  | 0.564969  | -1.253643 |
| 6  | 0 | 3.662855  | -0.452761 | 0.690484  |
| 1  | 0 | 3.461764  | -0.953873 | 1.646677  |
| 1  | 0 | 4.686674  | -0.081479 | 0.742784  |
| 6  | 0 | 3.447547  | -1.433073 | -0.446471 |
| 1  | 0 | 4.082663  | -2.317644 | -0.367353 |
| 1  | 0 | 3.699046  | -0.946825 | -1.400584 |
| 6  | 0 | 1.920196  | -1.787263 | -0.366085 |
| 14 | 0 | 1.839158  | -3.141622 | 1.117216  |



|    |   |           |           |           |
|----|---|-----------|-----------|-----------|
| 6  | 0 | 0.861614  | -4.725704 | 0.666849  |
| 1  | 0 | 0.723393  | -5.301163 | 1.593208  |
| 1  | 0 | -0.126627 | -4.568123 | 0.230841  |
| 1  | 0 | 1.431452  | -5.355506 | -0.026387 |
| 6  | 0 | 3.575833  | -3.860375 | 1.500378  |
| 1  | 0 | 3.440089  | -4.584424 | 2.317837  |
| 1  | 0 | 4.030177  | -4.399330 | 0.661068  |
| 1  | 0 | 4.291443  | -3.107111 | 1.850790  |
| 6  | 0 | 1.247539  | -2.520013 | 2.808457  |
| 1  | 0 | 2.094037  | -2.115149 | 3.372512  |
| 1  | 0 | 0.491209  | -1.737267 | 2.734440  |
| 1  | 0 | 0.840075  | -3.361546 | 3.382774  |
| 14 | 0 | 1.656674  | -2.800780 | -2.081624 |
| 6  | 0 | 0.043878  | -3.785845 | -2.366702 |
| 1  | 0 | -0.799915 | -3.476794 | -1.748641 |
| 1  | 0 | -0.258022 | -3.668757 | -3.416768 |
| 1  | 0 | 0.208080  | -4.854505 | -2.187207 |
| 6  | 0 | 1.922581  | -1.857667 | -3.725321 |
| 1  | 0 | 2.807900  | -1.212162 | -3.733734 |
| 1  | 0 | 2.082562  | -2.629722 | -4.493041 |
| 1  | 0 | 1.056100  | -1.264175 | -4.037728 |
| 6  | 0 | 3.063518  | -4.095967 | -2.171164 |
| 1  | 0 | 3.140460  | -4.747852 | -1.296221 |
| 1  | 0 | 2.865837  | -4.738516 | -3.041703 |
| 1  | 0 | 4.041013  | -3.623284 | -2.329779 |
| 6  | 0 | -2.616421 | -0.678575 | 0.382334  |
| 14 | 0 | -2.683780 | -1.615670 | 2.143680  |
| 6  | 0 | -2.130368 | -0.604549 | 3.654051  |
| 1  | 0 | -2.169084 | -1.273714 | 4.526118  |
| 1  | 0 | -1.115979 | -0.216542 | 3.558008  |
| 1  | 0 | -2.806114 | 0.233263  | 3.859216  |
| 6  | 0 | -4.529905 | -1.958431 | 2.535621  |
| 1  | 0 | -5.011094 | -2.645837 | 1.831036  |
| 1  | 0 | -4.560294 | -2.437365 | 3.525783  |
| 1  | 0 | -5.137324 | -1.047661 | 2.598020  |
| 6  | 0 | -1.903198 | -3.339630 | 2.325542  |
| 1  | 0 | -2.612658 | -4.123647 | 2.042452  |
| 1  | 0 | -0.991606 | -3.486057 | 1.753728  |
| 1  | 0 | -1.651769 | -3.485390 | 3.384378  |
| 14 | 0 | -3.506626 | -1.907839 | -0.966240 |

|    |   |           |           |           |
|----|---|-----------|-----------|-----------|
| 6  | 0 | -3.292180 | -3.775746 | -0.616984 |
| 1  | 0 | -3.583316 | -4.319379 | -1.526951 |
| 1  | 0 | -2.274070 | -4.081277 | -0.362610 |
| 1  | 0 | -3.951243 | -4.112040 | 0.192262  |
| 6  | 0 | -5.405830 | -1.648968 | -0.934588 |
| 1  | 0 | -5.847187 | -2.409927 | -1.595170 |
| 1  | 0 | -5.860067 | -1.770738 | 0.053957  |
| 1  | 0 | -5.700332 | -0.667299 | -1.328079 |
| 6  | 0 | -3.156361 | -1.743796 | -2.841734 |
| 1  | 0 | -3.333026 | -0.735334 | -3.230056 |
| 1  | 0 | -2.156160 | -2.060210 | -3.146478 |
| 1  | 0 | -3.879039 | -2.410900 | -3.335096 |
| 6  | 0 | -3.686207 | 0.449605  | 0.602717  |
| 1  | 0 | -3.523465 | 0.962918  | 1.559570  |
| 1  | 0 | -4.708548 | 0.071006  | 0.622749  |
| 6  | 0 | -3.438101 | 1.419952  | -0.536200 |
| 1  | 0 | -4.081623 | 2.300649  | -0.487454 |
| 1  | 0 | -3.653088 | 0.922570  | -1.493661 |
| 6  | 0 | -1.916774 | 1.785250  | -0.405398 |
| 14 | 0 | -1.895022 | 3.148299  | 1.074895  |
| 6  | 0 | -0.950650 | 4.756099  | 0.638429  |
| 1  | 0 | 0.051452  | 4.623575  | 0.226921  |
| 1  | 0 | -1.520592 | 5.368177  | -0.070329 |
| 1  | 0 | -0.849972 | 5.338161  | 1.565612  |
| 6  | 0 | -3.655722 | 3.825245  | 1.423501  |
| 1  | 0 | -3.553222 | 4.554968  | 2.240776  |
| 1  | 0 | -4.107307 | 4.350253  | 0.573777  |
| 1  | 0 | -4.359270 | 3.056012  | 1.763004  |
| 6  | 0 | -1.313844 | 2.554054  | 2.778696  |
| 1  | 0 | -2.157876 | 2.134586  | 3.334694  |
| 1  | 0 | -0.538535 | 1.788961  | 2.721719  |
| 1  | 0 | -0.933769 | 3.409965  | 3.350727  |
| 14 | 0 | -1.597245 | 2.795117  | -2.112682 |
| 6  | 0 | -3.016080 | 4.072020  | -2.261169 |
| 1  | 0 | -3.140979 | 4.719850  | -1.388556 |
| 1  | 0 | -2.790040 | 4.719769  | -3.120806 |
| 1  | 0 | -3.978627 | 3.585708  | -2.463647 |
| 6  | 0 | 0.017317  | 3.794695  | -2.332642 |
| 1  | 0 | 0.832204  | 3.504655  | -1.667540 |
| 1  | 0 | 0.373804  | 3.666696  | -3.364020 |

|   |   |           |           |           |
|---|---|-----------|-----------|-----------|
| 1 | 0 | -0.168085 | 4.863762  | -2.177312 |
| 6 | 0 | -1.782407 | 1.845072  | -3.763482 |
| 1 | 0 | -2.657893 | 1.187618  | -3.807790 |
| 1 | 0 | -1.919187 | 2.613217  | -4.539603 |
| 1 | 0 | -0.895604 | 1.262360  | -4.036567 |
| 1 | 0 | -0.637868 | -1.384176 | -1.529974 |
| 1 | 0 | -1.294493 | 0.000687  | -2.379003 |
| 1 | 0 | 1.328039  | -0.011990 | -2.361538 |
| 1 | 0 | 0.662718  | 1.379905  | -1.530406 |

-----  
-----  
**Si=Si=Si (pro)**  
-----

| Atomic<br>Number | Coordinates (Angstroms) |           |           |
|------------------|-------------------------|-----------|-----------|
|                  | X                       | Y         | Z         |
| 6                | 0.687095                | -0.371200 | 1.615298  |
| 6                | -0.683817               | 0.374653  | 1.614131  |
| 14               | -1.814170               | 0.072440  | 0.069129  |
| 14               | 0.001231                | -0.013551 | -1.669822 |
| 14               | 1.819010                | -0.071967 | 0.070045  |
| 6                | 3.068713                | -1.583829 | -0.309334 |
| 14               | 2.618683                | -2.608268 | -1.902911 |
| 6                | 2.851116                | -1.656539 | -3.534561 |
| 1                | 2.632678                | -2.353898 | -4.357068 |
| 1                | 2.175449                | -0.803386 | -3.637597 |
| 1                | 3.882934                | -1.308144 | -3.673240 |
| 6                | 3.706934                | -4.157350 | -2.169048 |
| 1                | 3.663421                | -4.891064 | -1.357896 |
| 1                | 3.365942                | -4.658547 | -3.086872 |
| 1                | 4.759509                | -3.883660 | -2.322881 |
| 6                | 0.804863                | -3.190957 | -1.815416 |
| 1                | 0.169243                | -2.522028 | -1.207982 |
| 1                | 0.362696                | -3.250605 | -2.817504 |
| 1                | 0.727167                | -4.181398 | -1.350642 |
| 14               | 3.371437                | -2.842915 | 1.171015  |
| 6                | 3.324716                | -2.178010 | 2.957584  |
| 1                | 4.013471                | -1.345758 | 3.130810  |
| 1                | 2.325905                | -1.869301 | 3.280892  |

|    |          |           |           |
|----|----------|-----------|-----------|
| 1  | 3.641190 | -3.004035 | 3.611937  |
| 6  | 2.131542 | -4.292591 | 1.185116  |
| 1  | 2.235905 | -4.959000 | 0.322202  |
| 1  | 2.315835 | -4.893394 | 2.087385  |
| 1  | 1.090194 | -3.954731 | 1.228946  |
| 6  | 5.129753 | -3.579487 | 1.028664  |
| 1  | 5.210688 | -4.432452 | 1.718199  |
| 1  | 5.380308 | -3.938095 | 0.025392  |
| 1  | 5.892732 | -2.848081 | 1.327834  |
| 6  | 4.411901 | -0.791679 | -0.570065 |
| 1  | 4.426515 | -0.389417 | -1.592581 |
| 1  | 5.289959 | -1.445701 | -0.484836 |
| 6  | 4.514432 | 0.385581  | 0.420372  |
| 1  | 5.439546 | 0.951459  | 0.255292  |
| 1  | 4.581532 | -0.024697 | 1.436711  |
| 6  | 3.236403 | 1.322793  | 0.292563  |
| 14 | 3.540839 | 2.525968  | -1.242061 |
| 6  | 2.707514 | 4.234625  | -1.072481 |
| 1  | 2.986097 | 4.828033  | -1.955558 |
| 1  | 1.615304 | 4.167285  | -1.060014 |
| 1  | 3.026132 | 4.794618  | -0.187286 |
| 6  | 5.411774 | 2.856681  | -1.452506 |
| 1  | 5.541291 | 3.612317  | -2.240853 |
| 1  | 5.893234 | 3.237278  | -0.545326 |
| 1  | 5.951626 | 1.956105  | -1.773708 |
| 6  | 2.990468 | 1.896157  | -2.951045 |
| 1  | 3.591097 | 1.048322  | -3.295687 |
| 1  | 1.937064 | 1.596775  | -2.999423 |
| 1  | 3.135928 | 2.715087  | -3.671358 |
| 14 | 3.190788 | 2.401561  | 1.921843  |
| 6  | 1.609579 | 3.430555  | 2.158308  |
| 1  | 0.787106 | 2.811554  | 2.534140  |
| 1  | 1.798360 | 4.210932  | 2.909361  |
| 1  | 1.276966 | 3.928476  | 1.242840  |
| 6  | 3.421159 | 1.418642  | 3.540944  |
| 1  | 4.401235 | 0.928008  | 3.594146  |
| 1  | 3.379051 | 2.143368  | 4.367657  |
| 1  | 2.653273 | 0.663512  | 3.729980  |
| 6  | 4.687237 | 3.593184  | 1.971984  |
| 1  | 4.681329 | 4.362747  | 1.193068  |

|    |           |           |           |
|----|-----------|-----------|-----------|
| 1  | 4.684824  | 4.107221  | 2.944182  |
| 1  | 5.635517  | 3.044051  | 1.897339  |
| 6  | -3.062978 | 1.586638  | -0.306988 |
| 14 | -2.629160 | 2.618921  | -1.901258 |
| 6  | -2.852391 | 1.661257  | -3.530507 |
| 1  | -2.638722 | 2.356461  | -4.355954 |
| 1  | -2.170549 | 0.812263  | -3.629860 |
| 1  | -3.881103 | 1.303869  | -3.668771 |
| 6  | -3.742553 | 4.152061  | -2.154937 |
| 1  | -3.694381 | 4.888638  | -1.346490 |
| 1  | -3.423872 | 4.654710  | -3.079825 |
| 1  | -4.793900 | 3.863958  | -2.289384 |
| 6  | -0.830547 | 3.242214  | -1.844672 |
| 1  | -0.707225 | 4.060933  | -1.128118 |
| 1  | -0.106652 | 2.458054  | -1.559203 |
| 1  | -0.520693 | 3.602734  | -2.834516 |
| 14 | -3.377367 | 2.836986  | 1.180679  |
| 6  | -2.150410 | 4.297307  | 1.215825  |
| 1  | -2.353278 | 4.890392  | 2.119229  |
| 1  | -1.106504 | 3.969083  | 1.273498  |
| 1  | -2.250779 | 4.968636  | 0.356151  |
| 6  | -5.139343 | 3.564831  | 1.036078  |
| 1  | -5.229970 | 4.406441  | 1.738194  |
| 1  | -5.384097 | 3.937815  | 0.036730  |
| 1  | -5.900515 | 2.824807  | 1.317969  |
| 6  | -3.333957 | 2.163815  | 2.964020  |
| 1  | -4.021299 | 1.329760  | 3.132350  |
| 1  | -2.335254 | 1.856129  | 3.289001  |
| 1  | -3.654272 | 2.986852  | 3.620288  |
| 6  | -4.404803 | 0.790522  | -0.571243 |
| 1  | -4.414283 | 0.386312  | -1.592859 |
| 1  | -5.283968 | 1.443400  | -0.490705 |
| 6  | -4.509048 | -0.385989 | 0.420392  |
| 1  | -5.434027 | -0.951847 | 0.254060  |
| 1  | -4.577479 | 0.024195  | 1.436652  |
| 6  | -3.231292 | -1.322682 | 0.293145  |
| 14 | -3.537424 | -2.527418 | -1.240392 |
| 6  | -2.693085 | -4.230984 | -1.074094 |
| 1  | -1.601423 | -4.157627 | -1.082772 |
| 1  | -2.991836 | -4.785957 | -0.178988 |

|    |           |           |           |
|----|-----------|-----------|-----------|
| 1  | -2.985229 | -4.832274 | -1.947322 |
| 6  | -5.407437 | -2.870120 | -1.440822 |
| 1  | -5.535400 | -3.625706 | -2.229498 |
| 1  | -5.882094 | -3.255096 | -0.532071 |
| 1  | -5.955014 | -1.973061 | -1.758724 |
| 6  | -3.004242 | -1.892986 | -2.953461 |
| 1  | -3.621063 | -1.055841 | -3.296761 |
| 1  | -1.956424 | -1.575607 | -3.006744 |
| 1  | -3.139779 | -2.715519 | -3.671598 |
| 14 | -3.175882 | -2.402248 | 1.921786  |
| 6  | -4.657965 | -3.611384 | 1.973434  |
| 1  | -4.641555 | -4.383231 | 1.196962  |
| 1  | -4.650231 | -4.122416 | 2.947249  |
| 1  | -5.612756 | -3.074045 | 1.896118  |
| 6  | -1.581745 | -3.412180 | 2.154283  |
| 1  | -0.773733 | -2.787967 | 2.552508  |
| 1  | -1.765380 | -4.211994 | 2.885912  |
| 1  | -1.230684 | -3.884642 | 1.232244  |
| 6  | -3.414579 | -1.424624 | 3.542619  |
| 1  | -4.399802 | -0.944663 | 3.598372  |
| 1  | -3.363626 | -2.150744 | 4.367693  |
| 1  | -2.654214 | -0.661975 | 3.731974  |
| 1  | -0.502220 | 1.458814  | 1.646844  |
| 1  | -1.216529 | 0.133894  | 2.542172  |
| 1  | 1.218620  | -0.129533 | 2.543499  |
| 1  | 0.503138  | -1.454851 | 1.650269  |

-----  
-----  
**Si=Ge=Si (pro)**

| Atomic<br>Number | Coordinates (Angstroms) |           |           |
|------------------|-------------------------|-----------|-----------|
|                  | X                       | Y         | Z         |
| 6                | 0.691061                | -0.372925 | 1.651224  |
| 6                | -0.681046               | 0.374083  | 1.650157  |
| 14               | -1.836113               | 0.063657  | 0.121578  |
| 32               | 0.001149                | -0.024884 | -1.708218 |
| 14               | 1.845274                | -0.065364 | 0.121462  |
| 6                | 3.096885                | -1.581191 | -0.247225 |

|    |          |           |           |
|----|----------|-----------|-----------|
| 14 | 2.646205 | -2.596688 | -1.845902 |
| 6  | 2.902631 | -1.643866 | -3.474997 |
| 1  | 2.678852 | -2.335915 | -4.300550 |
| 1  | 2.244119 | -0.778210 | -3.585195 |
| 1  | 3.940961 | -1.312064 | -3.605009 |
| 6  | 3.712763 | -4.159563 | -2.116860 |
| 1  | 3.654370 | -4.897746 | -1.310638 |
| 1  | 3.370498 | -4.650186 | -3.039942 |
| 1  | 4.769850 | -3.899370 | -2.262618 |
| 6  | 0.821545 | -3.157298 | -1.776801 |
| 1  | 0.191193 | -2.505096 | -1.145229 |
| 1  | 0.379397 | -3.189244 | -2.780623 |
| 1  | 0.734449 | -4.159935 | -1.339582 |
| 14 | 3.384869 | -2.848278 | 1.226051  |
| 6  | 3.343466 | -2.190124 | 3.014546  |
| 1  | 4.045460 | -1.369904 | 3.191755  |
| 1  | 2.348680 | -1.865500 | 3.335191  |
| 1  | 3.644083 | -3.023279 | 3.667498  |
| 6  | 2.125962 | -4.282310 | 1.230725  |
| 1  | 2.227570 | -4.949710 | 0.368100  |
| 1  | 2.295518 | -4.886076 | 2.133881  |
| 1  | 1.088875 | -3.930540 | 1.267371  |
| 6  | 5.134216 | -3.606143 | 1.082122  |
| 1  | 5.204168 | -4.465518 | 1.764977  |
| 1  | 5.382693 | -3.959707 | 0.076578  |
| 1  | 5.905367 | -2.886201 | 1.388177  |
| 6  | 4.442134 | -0.789493 | -0.499403 |
| 1  | 4.461187 | -0.383622 | -1.520527 |
| 1  | 5.320040 | -1.443888 | -0.413032 |
| 6  | 4.543349 | 0.385676  | 0.495537  |
| 1  | 5.467634 | 0.953456  | 0.330274  |
| 1  | 4.613700 | -0.028942 | 1.509762  |
| 6  | 3.263157 | 1.320957  | 0.377041  |
| 14 | 3.557211 | 2.543907  | -1.140351 |
| 6  | 2.691383 | 4.234615  | -0.952703 |
| 1  | 2.955673 | 4.845491  | -1.828179 |
| 1  | 1.600363 | 4.144359  | -0.939070 |
| 1  | 2.999406 | 4.789113  | -0.060306 |
| 6  | 5.423184 | 2.902267  | -1.347043 |
| 1  | 5.544605 | 3.668473  | -2.126451 |

|    |           |          |           |
|----|-----------|----------|-----------|
| 1  | 5.900131  | 3.277130 | -0.435339 |
| 1  | 5.973300  | 2.011521 | -1.678338 |
| 6  | 3.022426  | 1.929036 | -2.861028 |
| 1  | 3.613394  | 1.073067 | -3.202169 |
| 1  | 1.964297  | 1.649560 | -2.927535 |
| 1  | 3.191147  | 2.749565 | -3.574617 |
| 14 | 3.205010  | 2.380109 | 2.018884  |
| 6  | 1.612132  | 3.387998 | 2.273559  |
| 1  | 0.799729  | 2.755894 | 2.649760  |
| 1  | 1.797786  | 4.163820 | 3.030362  |
| 1  | 1.266191  | 3.890853 | 1.365556  |
| 6  | 3.446386  | 1.379159 | 3.624859  |
| 1  | 4.432110  | 0.899465 | 3.672983  |
| 1  | 3.394287  | 2.092062 | 4.461334  |
| 1  | 2.687071  | 0.612415 | 3.801631  |
| 6  | 4.685094  | 3.591567 | 2.083638  |
| 1  | 4.664063  | 4.374455 | 1.318030  |
| 1  | 4.679857  | 4.088928 | 3.064541  |
| 1  | 5.640860  | 3.057641 | 1.994972  |
| 6  | -3.081503 | 1.585716 | -0.247531 |
| 14 | -2.647020 | 2.606050 | -1.848812 |
| 6  | -2.888480 | 1.643603 | -3.474540 |
| 1  | -2.672211 | 2.334183 | -4.303184 |
| 1  | -2.219583 | 0.784915 | -3.580328 |
| 1  | -3.922195 | 1.298007 | -3.604845 |
| 6  | -3.746756 | 4.147400 | -2.111394 |
| 1  | -3.685988 | 4.892023 | -1.311031 |
| 1  | -3.430607 | 4.637405 | -3.043921 |
| 1  | -4.801678 | 3.867547 | -2.234795 |
| 6  | -0.842072 | 3.220088 | -1.814513 |
| 1  | -0.717207 | 4.059726 | -1.120965 |
| 1  | -0.113339 | 2.449353 | -1.501869 |
| 1  | -0.535258 | 3.555072 | -2.815404 |
| 14 | -3.381216 | 2.846218 | 1.232014  |
| 6  | -2.145559 | 4.300209 | 1.248263  |
| 1  | -2.338190 | 4.901100 | 2.148773  |
| 1  | -1.103278 | 3.965359 | 1.301177  |
| 1  | -2.247661 | 4.966308 | 0.384540  |
| 6  | -5.140094 | 3.583135 | 1.093780  |
| 1  | -5.222710 | 4.430014 | 1.790591  |



|    |           |           |           |
|----|-----------|-----------|-----------|
| 1  | -5.389156 | 3.950324  | 0.093337  |
| 1  | -5.903265 | 2.848780  | 1.385094  |
| 6  | -3.330052 | 2.184815  | 3.019062  |
| 1  | -4.026493 | 1.360328  | 3.197427  |
| 1  | -2.332472 | 1.866264  | 3.336828  |
| 1  | -3.634175 | 3.015578  | 3.673385  |
| 6  | -4.427359 | 0.793979  | -0.503709 |
| 1  | -4.440663 | 0.383947  | -1.523083 |
| 1  | -5.304350 | 1.450274  | -0.425123 |
| 6  | -4.535550 | -0.377515 | 0.494824  |
| 1  | -5.462226 | -0.941449 | 0.329525  |
| 1  | -4.605551 | 0.039579  | 1.508072  |
| 6  | -3.259683 | -1.317990 | 0.378921  |
| 14 | -3.561020 | -2.541265 | -1.137680 |
| 6  | -2.689636 | -4.229805 | -0.957060 |
| 1  | -1.598750 | -4.138328 | -0.952201 |
| 1  | -2.989941 | -4.783994 | -0.061891 |
| 1  | -2.960524 | -4.841540 | -1.829907 |
| 6  | -5.427412 | -2.906292 | -1.330648 |
| 1  | -5.550694 | -3.673580 | -2.108745 |
| 1  | -5.897692 | -3.282097 | -0.416009 |
| 1  | -5.982762 | -2.017979 | -1.659747 |
| 6  | -3.046459 | -1.922673 | -2.863319 |
| 1  | -3.652213 | -1.075004 | -3.199985 |
| 1  | -1.993123 | -1.628153 | -2.938367 |
| 1  | -3.210632 | -2.746107 | -3.574664 |
| 14 | -3.201047 | -2.377076 | 2.020543  |
| 6  | -4.677421 | -3.592678 | 2.088480  |
| 1  | -4.652946 | -4.378456 | 1.325937  |
| 1  | -4.670315 | -4.086293 | 3.071260  |
| 1  | -5.635201 | -3.062862 | 1.997656  |
| 6  | -1.606241 | -3.382393 | 2.271118  |
| 1  | -0.795452 | -2.750587 | 2.651318  |
| 1  | -1.790105 | -4.163252 | 3.023292  |
| 1  | -1.258885 | -3.879221 | 1.360219  |
| 6  | -3.441403 | -1.377231 | 3.627172  |
| 1  | -4.426926 | -0.897192 | 3.676390  |
| 1  | -3.389068 | -2.090938 | 4.462908  |
| 1  | -2.681463 | -0.611133 | 3.803950  |
| 1  | -0.497652 | 1.458343  | 1.673366  |

|   |           |           |          |
|---|-----------|-----------|----------|
| 1 | -1.206097 | 0.141792  | 2.585479 |
| 1 | 1.215936  | -0.138239 | 2.585959 |
| 1 | 0.506611  | -1.456782 | 1.678215 |

-----  
-----  
**Ge=Si=Ge (pro)**  
-----

| Atomic<br>Number | Coordinates (Angstroms) |           |           |
|------------------|-------------------------|-----------|-----------|
|                  | X                       | Y         | Z         |
| 6                | 0.684544                | -0.368040 | 1.686604  |
| 6                | -0.679876               | 0.372510  | 1.685778  |
| 32               | -1.825156               | 0.063721  | 0.063403  |
| 14               | 0.000737                | -0.016458 | -1.727072 |
| 32               | 1.831097                | -0.063011 | 0.063930  |
| 6                | 3.137523                | -1.618601 | -0.318594 |
| 14               | 2.660938                | -2.631963 | -1.908697 |
| 6                | 2.885610                | -1.674165 | -3.538174 |
| 1                | 2.661557                | -2.367352 | -4.362577 |
| 1                | 2.209949                | -0.819817 | -3.634953 |
| 1                | 3.916307                | -1.324822 | -3.681621 |
| 6                | 3.731335                | -4.191197 | -2.182575 |
| 1                | 3.681535                | -4.924191 | -1.370731 |
| 1                | 3.385058                | -4.689115 | -3.099999 |
| 1                | 4.786181                | -3.926278 | -2.336182 |
| 6                | 0.839332                | -3.197066 | -1.816268 |
| 1                | 0.210049                | -2.518159 | -1.213142 |
| 1                | 0.398375                | -3.256798 | -2.819198 |
| 1                | 0.748679                | -4.184502 | -1.347355 |
| 14               | 3.423596                | -2.861471 | 1.169138  |
| 6                | 3.377757                | -2.177243 | 2.948585  |
| 1                | 4.065126                | -1.342141 | 3.113662  |
| 1                | 2.378177                | -1.866103 | 3.267982  |
| 1                | 3.693825                | -2.995600 | 3.612684  |
| 6                | 2.161443                | -4.291822 | 1.191778  |
| 1                | 2.256312                | -4.964981 | 0.332903  |
| 1                | 2.333674                | -4.889981 | 2.098044  |
| 1                | 1.125219                | -3.936449 | 1.230950  |
| 6                | 5.174034                | -3.614939 | 1.029378  |

|    |           |           |           |
|----|-----------|-----------|-----------|
| 1  | 5.252931  | -4.463837 | 1.723828  |
| 1  | 5.416647  | -3.980485 | 0.026456  |
| 1  | 5.942708  | -2.885863 | 1.319606  |
| 6  | 4.462438  | -0.798312 | -0.576840 |
| 1  | 4.471380  | -0.401673 | -1.601804 |
| 1  | 5.351500  | -1.438052 | -0.488891 |
| 6  | 4.569047  | 0.390698  | 0.407405  |
| 1  | 5.503976  | 0.939798  | 0.235241  |
| 1  | 4.634821  | -0.014665 | 1.425896  |
| 6  | 3.315764  | 1.357742  | 0.288012  |
| 14 | 3.592267  | 2.547199  | -1.252078 |
| 6  | 2.725834  | 4.239009  | -1.084869 |
| 1  | 2.991970  | 4.839506  | -1.966830 |
| 1  | 1.634574  | 4.146997  | -1.074439 |
| 1  | 3.030159  | 4.805053  | -0.198515 |
| 6  | 5.457957  | 2.893469  | -1.470528 |
| 1  | 5.583842  | 3.647258  | -2.260898 |
| 1  | 5.937492  | 3.277454  | -0.563725 |
| 1  | 6.001267  | 1.993839  | -1.788808 |
| 6  | 3.032873  | 1.897735  | -2.951135 |
| 1  | 3.632786  | 1.048685  | -3.294359 |
| 1  | 1.979905  | 1.593820  | -2.985867 |
| 1  | 3.166361  | 2.710169  | -3.681066 |
| 14 | 3.249202  | 2.426604  | 1.919049  |
| 6  | 1.646705  | 3.426455  | 2.149795  |
| 1  | 0.838946  | 2.794749  | 2.537216  |
| 1  | 1.821638  | 4.219594  | 2.890949  |
| 1  | 1.297789  | 3.906811  | 1.230662  |
| 6  | 3.481326  | 1.434357  | 3.531751  |
| 1  | 4.464301  | 0.949736  | 3.586341  |
| 1  | 3.428429  | 2.150982  | 4.364917  |
| 1  | 2.717753  | 0.671917  | 3.709600  |
| 6  | 4.725632  | 3.640740  | 1.975959  |
| 1  | 4.705945  | 4.411074  | 1.197676  |
| 1  | 4.717460  | 4.152807  | 2.949015  |
| 1  | 5.681357  | 3.105014  | 1.897399  |
| 6  | -3.130498 | 1.621874  | -0.317249 |
| 14 | -2.668903 | 2.640955  | -1.909017 |
| 6  | -2.885719 | 1.677288  | -3.535940 |
| 1  | -2.667431 | 2.368566  | -4.363377 |

|    |           |           |           |
|----|-----------|-----------|-----------|
| 1  | -2.203837 | 0.827220  | -3.630089 |
| 1  | -3.913469 | 1.318940  | -3.678010 |
| 6  | -3.761699 | 4.186632  | -2.171878 |
| 1  | -3.704672 | 4.924114  | -1.364375 |
| 1  | -3.438150 | 4.683561  | -3.097933 |
| 1  | -4.816190 | 3.909082  | -2.304014 |
| 6  | -0.860762 | 3.242576  | -1.848326 |
| 1  | -0.722899 | 4.056047  | -1.128308 |
| 1  | -0.146118 | 2.447260  | -1.568530 |
| 1  | -0.549093 | 3.603888  | -2.837443 |
| 14 | -3.427895 | 2.856701  | 1.177197  |
| 6  | -2.180306 | 4.299295  | 1.217707  |
| 1  | -2.373280 | 4.893704  | 2.122300  |
| 1  | -1.141192 | 3.954065  | 1.274371  |
| 1  | -2.269401 | 4.973821  | 0.359203  |
| 6  | -5.183787 | 3.597917  | 1.038527  |
| 1  | -5.272355 | 4.436295  | 1.744463  |
| 1  | -5.424269 | 3.975752  | 0.039788  |
| 1  | -5.948295 | 2.859160  | 1.314794  |
| 6  | -3.381622 | 2.165248  | 2.953781  |
| 1  | -4.066790 | 1.327927  | 3.115640  |
| 1  | -2.381526 | 1.856243  | 3.273474  |
| 1  | -3.700972 | 2.980651  | 3.619938  |
| 6  | -4.454383 | 0.798573  | -0.578707 |
| 1  | -4.458866 | 0.400056  | -1.602808 |
| 1  | -5.344176 | 1.437737  | -0.495229 |
| 6  | -4.563300 | -0.389505 | 0.406666  |
| 1  | -5.498564 | -0.937684 | 0.233228  |
| 1  | -4.630373 | 0.015914  | 1.424976  |
| 6  | -3.310815 | -1.357016 | 0.288318  |
| 14 | -3.590217 | -2.548099 | -1.250891 |
| 6  | -2.717275 | -4.237017 | -1.087846 |
| 1  | -1.626338 | -4.143151 | -1.092096 |
| 1  | -3.008714 | -4.799657 | -0.195142 |
| 1  | -2.993954 | -4.841977 | -1.963528 |
| 6  | -5.455634 | -2.903173 | -1.458665 |
| 1  | -5.581556 | -3.657717 | -2.248354 |
| 1  | -5.928623 | -3.289624 | -0.549553 |
| 1  | -6.005281 | -2.006571 | -1.774522 |
| 6  | -3.045997 | -1.896094 | -2.954006 |

|    |           |           |           |
|----|-----------|-----------|-----------|
| 1  | -3.656791 | -1.053608 | -3.294749 |
| 1  | -1.996492 | -1.581377 | -2.994616 |
| 1  | -3.175935 | -2.710780 | -3.682068 |
| 14 | -3.239149 | -2.426737 | 1.918589  |
| 6  | -4.706145 | -3.651885 | 1.978484  |
| 1  | -4.679976 | -4.424489 | 1.202722  |
| 1  | -4.692780 | -4.160902 | 2.953105  |
| 1  | -5.666532 | -3.124925 | 1.898876  |
| 6  | -1.629566 | -3.416049 | 2.144154  |
| 1  | -0.831864 | -2.784322 | 2.551732  |
| 1  | -1.802027 | -4.226448 | 2.866886  |
| 1  | -1.267663 | -3.873466 | 1.218369  |
| 6  | -3.475195 | -1.438020 | 3.532728  |
| 1  | -4.461745 | -0.961047 | 3.590162  |
| 1  | -3.414985 | -2.155401 | 4.364748  |
| 1  | -2.717024 | -0.670110 | 3.709868  |
| 1  | -0.512025 | 1.457867  | 1.726123  |
| 1  | -1.237930 | 0.113027  | 2.592762  |
| 1  | 1.242235  | -0.108015 | 2.593588  |
| 1  | 0.514312  | -1.452835 | 1.728994  |

-----  
-----  
**Ge=Ge=Ge (pro)**

-----

| Atomic<br>Number | Coordinates (Angstroms) |           |           |
|------------------|-------------------------|-----------|-----------|
|                  | X                       | Y         | Z         |
| 6                | 0.693653                | -0.351778 | 1.731593  |
| 6                | -0.693607               | 0.351499  | 1.731776  |
| 32               | -1.869738               | 0.059312  | 0.112100  |
| 32               | -0.000025               | -0.000227 | -1.771318 |
| 32               | 1.869844                | -0.059150 | 0.112099  |
| 6                | 3.172598                | -1.646556 | -0.228555 |
| 14               | 2.692455                | -2.676606 | -1.806217 |
| 6                | 2.966753                | -1.748229 | -3.446374 |
| 1                | 2.714410                | -2.438520 | -4.264896 |
| 1                | 2.338179                | -0.860494 | -3.560668 |
| 1                | 4.014339                | -1.451294 | -3.586186 |
| 6                | 3.713927                | -4.273664 | -2.052388 |

|    |          |           |           |
|----|----------|-----------|-----------|
| 1  | 3.630058 | -4.995407 | -1.233244 |
| 1  | 3.359992 | -4.769802 | -2.967947 |
| 1  | 4.778802 | -4.047297 | -2.197707 |
| 6  | 0.853730 | -3.192556 | -1.739130 |
| 1  | 0.223712 | -2.479459 | -1.177100 |
| 1  | 0.438170 | -3.286228 | -2.750632 |
| 1  | 0.728094 | -4.157972 | -1.233572 |
| 14 | 3.439274 | -2.871212 | 1.276306  |
| 6  | 3.427507 | -2.154473 | 3.042650  |
| 1  | 4.157377 | -1.352833 | 3.190983  |
| 1  | 2.444908 | -1.787084 | 3.355137  |
| 1  | 3.702577 | -2.974642 | 3.722624  |
| 6  | 2.138816 | -4.265686 | 1.330033  |
| 1  | 2.204293 | -4.950656 | 0.477783  |
| 1  | 2.304518 | -4.859028 | 2.240693  |
| 1  | 1.113443 | -3.880838 | 1.376889  |
| 6  | 5.167992 | -3.676859 | 1.140112  |
| 1  | 5.227067 | -4.513875 | 1.850992  |
| 1  | 5.394402 | -4.069448 | 0.143729  |
| 1  | 5.959830 | -2.965439 | 1.411419  |
| 6  | 4.508943 | -0.846196 | -0.490420 |
| 1  | 4.528794 | -0.464348 | -1.520504 |
| 1  | 5.390319 | -1.495326 | -0.388616 |
| 6  | 4.628802 | 0.355653  | 0.477686  |
| 1  | 5.573180 | 0.887555  | 0.298411  |
| 1  | 4.688722 | -0.036104 | 1.501517  |
| 6  | 3.391219 | 1.338604  | 0.343583  |
| 14 | 3.694949 | 2.512012  | -1.201231 |
| 6  | 2.777213 | 4.180469  | -1.086615 |
| 1  | 3.041984 | 4.773224  | -1.974185 |
| 1  | 1.688915 | 4.056604  | -1.093213 |
| 1  | 3.047752 | 4.771328  | -0.205368 |
| 6  | 5.558036 | 2.903619  | -1.369554 |
| 1  | 5.687190 | 3.656954  | -2.160114 |
| 1  | 6.004133 | 3.303449  | -0.452930 |
| 1  | 6.132499 | 2.016932  | -1.669038 |
| 6  | 3.213830 | 1.825045  | -2.910028 |
| 1  | 3.825443 | 0.965219  | -3.202702 |
| 1  | 2.160992 | 1.527786  | -2.985115 |
| 1  | 3.386638 | 2.618792  | -3.651975 |

|    |           |          |           |
|----|-----------|----------|-----------|
| 14 | 3.311868  | 2.423987 | 1.962156  |
| 6  | 1.685261  | 3.387799 | 2.172994  |
| 1  | 0.893024  | 2.744509 | 2.573442  |
| 1  | 1.837492  | 4.203111 | 2.894608  |
| 1  | 1.326675  | 3.836386 | 1.241255  |
| 6  | 3.564897  | 1.441539 | 3.576872  |
| 1  | 4.567132  | 0.998380 | 3.639675  |
| 1  | 3.473294  | 2.151634 | 4.412123  |
| 1  | 2.833208  | 0.645793 | 3.742143  |
| 6  | 4.752074  | 3.682158 | 2.024347  |
| 1  | 4.704659  | 4.459775 | 1.254236  |
| 1  | 4.727113  | 4.184523 | 3.002353  |
| 1  | 5.726030  | 3.181631 | 1.940376  |
| 6  | -3.172578 | 1.646759 | -0.228554 |
| 14 | -2.692715 | 2.676766 | -1.806406 |
| 6  | -2.966306 | 1.747528 | -3.446159 |
| 1  | -2.713640 | 2.437285 | -4.265038 |
| 1  | -2.337556 | 0.859815 | -3.559505 |
| 1  | -4.013770 | 1.450368 | -3.586312 |
| 6  | -3.714605 | 4.273509 | -2.052865 |
| 1  | -3.630863 | 4.995200 | -1.233677 |
| 1  | -3.360651 | 4.769697 | -2.968383 |
| 1  | -4.779417 | 4.046947 | -2.198262 |
| 6  | -0.854245 | 3.193490 | -1.739688 |
| 1  | -0.728459 | 4.157641 | -1.231638 |
| 1  | -0.223162 | 2.479080 | -1.180416 |
| 1  | -0.439799 | 3.290020 | -2.751458 |
| 14 | -3.439380 | 2.871531 | 1.276266  |
| 6  | -2.139053 | 4.266086 | 1.330022  |
| 1  | -2.304867 | 4.859484 | 2.240622  |
| 1  | -1.113655 | 3.881378 | 1.376952  |
| 1  | -2.204578 | 4.950992 | 0.477739  |
| 6  | -5.168059 | 3.677131 | 1.139732  |
| 1  | -5.227527 | 4.513767 | 1.851023  |
| 1  | -5.393940 | 4.070233 | 0.143442  |
| 1  | -5.960024 | 2.965576 | 1.410258  |
| 6  | -3.427745 | 2.154681 | 3.042530  |
| 1  | -4.157768 | 1.353194 | 3.190814  |
| 1  | -2.445229 | 1.787080 | 3.354934  |
| 1  | -3.702619 | 2.974822 | 3.722628  |

|    |           |           |           |
|----|-----------|-----------|-----------|
| 6  | -4.509019 | 0.846310  | -0.490429 |
| 1  | -4.528995 | 0.464631  | -1.520539 |
| 1  | -5.390447 | 1.495326  | -0.388407 |
| 6  | -4.628800 | -0.355772 | 0.477494  |
| 1  | -5.573085 | -0.887762 | 0.298010  |
| 1  | -4.688971 | 0.035868  | 1.501342  |
| 6  | -3.390993 | -1.338571 | 0.343434  |
| 14 | -3.694480 | -2.512330 | -1.201307 |
| 6  | -2.776837 | -4.180799 | -1.086048 |
| 1  | -1.688537 | -4.056879 | -1.090671 |
| 1  | -3.048837 | -4.772314 | -0.205670 |
| 1  | -3.040004 | -4.773063 | -1.974432 |
| 6  | -5.557553 | -2.903850 | -1.369924 |
| 1  | -5.686546 | -3.658000 | -2.159743 |
| 1  | -6.004088 | -3.302666 | -0.453078 |
| 1  | -6.131780 | -2.017411 | -1.670557 |
| 6  | -3.213096 | -1.825863 | -2.910222 |
| 1  | -3.824048 | -0.965539 | -3.202724 |
| 1  | -2.160018 | -1.529617 | -2.985729 |
| 1  | -3.386868 | -2.619517 | -3.652060 |
| 14 | -3.311959 | -2.423849 | 1.962236  |
| 6  | -4.752197 | -3.682008 | 2.024384  |
| 1  | -4.704703 | -4.459631 | 1.254286  |
| 1  | -4.727277 | -4.184379 | 3.002396  |
| 1  | -5.726166 | -3.181540 | 1.940352  |
| 6  | -1.685610 | -3.387853 | 2.173759  |
| 1  | -0.892601 | -2.744102 | 2.571908  |
| 1  | -1.837599 | -4.201375 | 2.897472  |
| 1  | -1.328199 | -3.838889 | 1.242752  |
| 6  | -3.565197 | -1.441112 | 3.576749  |
| 1  | -4.567573 | -0.998319 | 3.639594  |
| 1  | -3.473244 | -2.150992 | 4.412154  |
| 1  | -2.833794 | -0.645087 | 3.741784  |
| 1  | -0.551832 | 1.439748  | 1.793641  |
| 1  | -1.243487 | 0.061066  | 2.636253  |
| 1  | 1.243605  | -0.061953 | 2.636244  |
| 1  | 0.551983  | -1.440090 | 1.792751  |

-----  
-----



## Sn=Sn=Sn (pro)

| Atomic<br>Number | Coordinates (Angstroms) |           |           |
|------------------|-------------------------|-----------|-----------|
|                  | X                       | Y         | Z         |
| 6                | 0.692431                | -0.346346 | 1.950146  |
| 6                | -0.692114               | 0.346193  | 1.950520  |
| 50               | -1.933380               | 0.036204  | 0.177683  |
| 50               | -0.000151               | -0.000619 | -2.025466 |
| 50               | 1.933287                | -0.035995 | 0.177337  |
| 6                | 3.344097                | -1.724068 | -0.151932 |
| 14               | 2.844326                | -2.741886 | -1.725994 |
| 6                | 3.133334                | -1.808189 | -3.364044 |
| 1                | 2.846067                | -2.479673 | -4.186715 |
| 1                | 2.542590                | -0.893076 | -3.471934 |
| 1                | 4.189978                | -1.548965 | -3.510175 |
| 6                | 3.816668                | -4.365442 | -1.983054 |
| 1                | 3.713583                | -5.080016 | -1.159392 |
| 1                | 3.443609                | -4.854303 | -2.894945 |
| 1                | 4.886746                | -4.169434 | -2.131873 |
| 6                | 0.989651                | -3.235140 | -1.679341 |
| 1                | 0.359093                | -2.529965 | -1.108809 |
| 1                | 0.585782                | -3.317567 | -2.697658 |
| 1                | 0.848272                | -4.207314 | -1.190603 |
| 14               | 3.564296                | -2.925800 | 1.359531  |
| 6                | 3.529780                | -2.167708 | 3.108308  |
| 1                | 4.262734                | -1.367353 | 3.250949  |
| 1                | 2.543310                | -1.782822 | 3.387030  |
| 1                | 3.779610                | -2.970302 | 3.818213  |
| 6                | 2.211536                | -4.272447 | 1.413669  |
| 1                | 2.255750                | -4.969847 | 0.569733  |
| 1                | 2.341361                | -4.861764 | 2.332620  |
| 1                | 1.201231                | -3.844238 | 1.444443  |
| 6                | 5.272714                | -3.771968 | 1.251958  |
| 1                | 5.320424                | -4.594026 | 1.980370  |
| 1                | 5.487361                | -4.187485 | 0.261897  |
| 1                | 6.076130                | -3.066361 | 1.503942  |
| 6                | 4.657873                | -0.874815 | -0.401747 |
| 1                | 4.673045                | -0.505506 | -1.437082 |

|    |           |           |           |
|----|-----------|-----------|-----------|
| 1  | 5.556521  | -1.500460 | -0.291023 |
| 6  | 4.789953  | 0.354806  | 0.548951  |
| 1  | 5.754118  | 0.847284  | 0.354204  |
| 1  | 4.846474  | -0.022201 | 1.579220  |
| 6  | 3.599303  | 1.399354  | 0.424507  |
| 14 | 3.871936  | 2.560496  | -1.117754 |
| 6  | 2.871206  | 4.183296  | -1.016975 |
| 1  | 3.101902  | 4.785076  | -1.907954 |
| 1  | 1.789260  | 3.998193  | -1.024478 |
| 1  | 3.102843  | 4.795048  | -0.138420 |
| 6  | 5.721155  | 2.998578  | -1.284014 |
| 1  | 5.842600  | 3.749965  | -2.077179 |
| 1  | 6.152892  | 3.406845  | -0.364282 |
| 1  | 6.310227  | 2.118561  | -1.575761 |
| 6  | 3.408228  | 1.857227  | -2.827668 |
| 1  | 3.980757  | 0.962937  | -3.095940 |
| 1  | 2.342891  | 1.612332  | -2.918746 |
| 1  | 3.628504  | 2.629488  | -3.579666 |
| 14 | 3.473079  | 2.469644  | 2.041731  |
| 6  | 1.803089  | 3.372684  | 2.225675  |
| 1  | 1.028446  | 2.693701  | 2.603052  |
| 1  | 1.907525  | 4.183985  | 2.960723  |
| 1  | 1.441328  | 3.819893  | 1.294075  |
| 6  | 3.694124  | 1.464616  | 3.646494  |
| 1  | 4.694765  | 1.022519  | 3.732854  |
| 1  | 3.569595  | 2.155640  | 4.493372  |
| 1  | 2.959348  | 0.663133  | 3.769083  |
| 6  | 4.865723  | 3.773984  | 2.138353  |
| 1  | 4.801988  | 4.544746  | 1.361924  |
| 1  | 4.809353  | 4.279596  | 3.113169  |
| 1  | 5.856121  | 3.304400  | 2.068681  |
| 6  | -3.344034 | 1.724346  | -0.152143 |
| 14 | -2.844132 | 2.741786  | -1.726427 |
| 6  | -3.132560 | 1.807377  | -3.364141 |
| 1  | -2.845173 | 2.478485  | -4.187070 |
| 1  | -2.541360 | 0.892468  | -3.471190 |
| 1  | -4.189039 | 1.547673  | -3.510540 |
| 6  | -3.816623 | 4.365197  | -1.983987 |
| 1  | -3.713732 | 5.079771  | -1.160310 |
| 1  | -3.443343 | 4.853962  | -2.895829 |

|    |           |           |           |
|----|-----------|-----------|-----------|
| 1  | -4.886648 | 4.169082  | -2.133043 |
| 6  | -0.989558 | 3.235446  | -1.680297 |
| 1  | -0.847905 | 4.206541  | -1.189520 |
| 1  | -0.357959 | 2.529167  | -1.112270 |
| 1  | -0.586869 | 3.320221  | -2.698886 |
| 14 | -3.564438 | 2.926370  | 1.359042  |
| 6  | -2.211707 | 4.273029  | 1.413053  |
| 1  | -2.341688 | 4.862599  | 2.331816  |
| 1  | -1.201400 | 3.844853  | 1.444088  |
| 1  | -2.255841 | 4.970185  | 0.568908  |
| 6  | -5.272775 | 3.772549  | 1.250823  |
| 1  | -5.320943 | 4.594298  | 1.979549  |
| 1  | -5.486682 | 4.188477  | 0.260773  |
| 1  | -6.076387 | 3.066868  | 1.501957  |
| 6  | -3.530130 | 2.168519  | 3.107919  |
| 1  | -4.263304 | 1.368376  | 3.250630  |
| 1  | -2.543755 | 1.783410  | 3.386668  |
| 1  | -3.779749 | 2.971241  | 3.817749  |
| 6  | -4.657691 | 0.874920  | -0.402143 |
| 1  | -4.672465 | 0.505500  | -1.437433 |
| 1  | -5.556458 | 1.500448  | -0.291724 |
| 6  | -4.789938 | -0.354678 | 0.548585  |
| 1  | -5.754082 | -0.847154 | 0.353688  |
| 1  | -4.846593 | 0.022403  | 1.578832  |
| 6  | -3.599280 | -1.399263 | 0.424454  |
| 14 | -3.871405 | -2.560834 | -1.117651 |
| 6  | -2.870780 | -4.183659 | -1.015876 |
| 1  | -1.788834 | -3.998484 | -1.022010 |
| 1  | -3.103414 | -4.795718 | -0.137775 |
| 1  | -3.100317 | -4.785249 | -1.907288 |
| 6  | -5.720627 | -2.998749 | -1.284357 |
| 1  | -5.841800 | -3.751135 | -2.076614 |
| 1  | -6.152987 | -3.405708 | -0.364340 |
| 1  | -6.309319 | -2.118962 | -1.577577 |
| 6  | -3.407223 | -1.858575 | -2.827862 |
| 1  | -3.978073 | -0.963150 | -3.095890 |
| 1  | -2.341422 | -1.615988 | -2.919713 |
| 1  | -3.629609 | -2.630503 | -3.579585 |
| 14 | -3.473531 | -2.469190 | 2.041952  |
| 6  | -4.866158 | -3.773540 | 2.138459  |

|   |           |           |          |
|---|-----------|-----------|----------|
| 1 | -4.802279 | -4.544198 | 1.361943 |
| 1 | -4.809857 | -4.279223 | 3.113240 |
| 1 | -5.856572 | -3.304002 | 2.068690 |
| 6 | -1.803665 | -3.372242 | 2.226625 |
| 1 | -1.028504 | -2.692820 | 2.602125 |
| 1 | -1.907896 | -4.182059 | 2.963335 |
| 1 | -1.442743 | -3.821389 | 1.295650 |
| 6 | -3.694920 | -1.463630 | 3.646326 |
| 1 | -4.695778 | -1.022015 | 3.732630 |
| 1 | -3.569899 | -2.154227 | 4.493477 |
| 1 | -2.960549 | -0.661711 | 3.768445 |
| 1 | -0.570107 | 1.436815  | 2.027742 |
| 1 | -1.263862 | 0.036966  | 2.836032 |
| 1 | 1.264406  | -0.037427 | 2.835605 |
| 1 | 0.570511  | -1.437001 | 2.026937 |

Pb=Pb=Pb (pro)

| Atomic<br>Number | Coordinates (Angstroms) |           |           |
|------------------|-------------------------|-----------|-----------|
|                  | X                       | Y         | Z         |
| 6                | 0.716778                | -0.276670 | 2.098171  |
| 6                | -0.716372               | 0.276200  | 2.098659  |
| 82               | -2.010315               | 0.000827  | 0.231468  |
| 82               | -0.000054               | -0.002036 | -2.038096 |
| 82               | 2.010547                | -0.001547 | 0.230559  |
| 6                | 3.552572                | -1.733303 | 0.050832  |
| 14               | 3.116405                | -2.845817 | -1.474620 |
| 6                | 3.467872                | -1.997120 | -3.144982 |
| 1                | 3.192277                | -2.694988 | -3.949028 |
| 1                | 2.902079                | -1.073064 | -3.301674 |
| 1                | 4.532857                | -1.763067 | -3.270356 |
| 6                | 4.110097                | -4.476690 | -1.583685 |
| 1                | 3.959294                | -5.139221 | -0.724138 |
| 1                | 3.793783                | -5.023315 | -2.484003 |
| 1                | 5.187003                | -4.284303 | -1.678027 |
| 6                | 1.269792                | -3.362345 | -1.498599 |
| 1                | 0.589467                | -2.555776 | -1.172797 |

|    |          |           |           |
|----|----------|-----------|-----------|
| 1  | 0.976788 | -3.667928 | -2.512741 |
| 1  | 1.072276 | -4.206660 | -0.827262 |
| 14 | 3.753619 | -2.823820 | 1.645949  |
| 6  | 3.717593 | -1.943420 | 3.335749  |
| 1  | 4.517850 | -1.204048 | 3.447278  |
| 1  | 2.763105 | -1.452996 | 3.551169  |
| 1  | 3.873132 | -2.709510 | 4.110038  |
| 6  | 2.404228 | -4.168088 | 1.767475  |
| 1  | 2.464197 | -4.912552 | 0.965069  |
| 1  | 2.522545 | -4.703821 | 2.720150  |
| 1  | 1.392046 | -3.743014 | 1.757229  |
| 6  | 5.461534 | -3.683777 | 1.622288  |
| 1  | 5.505352 | -4.428162 | 2.430574  |
| 1  | 5.671229 | -4.199816 | 0.680012  |
| 1  | 6.271048 | -2.963144 | 1.800890  |
| 6  | 4.844953 | -0.864463 | -0.207418 |
| 1  | 4.892078 | -0.561029 | -1.261421 |
| 1  | 5.753648 | -1.461145 | -0.027197 |
| 6  | 4.941497 | 0.425919  | 0.669221  |
| 1  | 5.919641 | 0.894911  | 0.473108  |
| 1  | 4.965286 | 0.115801  | 1.722117  |
| 6  | 3.781084 | 1.472918  | 0.443869  |
| 14 | 4.083198 | 2.524062  | -1.163154 |
| 6  | 2.922318 | 4.034314  | -1.262458 |
| 1  | 3.100425 | 4.555796  | -2.213642 |
| 1  | 1.864426 | 3.739465  | -1.244869 |
| 1  | 3.083074 | 4.757644  | -0.455426 |
| 6  | 5.891943 | 3.138327  | -1.223752 |
| 1  | 6.018448 | 3.802515  | -2.090928 |
| 1  | 6.189758 | 3.695267  | -0.329789 |
| 1  | 6.592592 | 2.301927  | -1.350765 |
| 6  | 3.849759 | 1.642245  | -2.838595 |
| 1  | 4.529736 | 0.795068  | -2.977183 |
| 1  | 2.825684 | 1.284764  | -3.001125 |
| 1  | 4.070494 | 2.371522  | -3.632294 |
| 14 | 3.562587 | 2.631411  | 1.987519  |
| 6  | 1.819662 | 3.395015  | 2.077278  |
| 1  | 1.059132 | 2.628994  | 2.270610  |
| 1  | 1.774224 | 4.118894  | 2.903481  |
| 1  | 1.544432 | 3.923635  | 1.158274  |

|    |           |           |           |
|----|-----------|-----------|-----------|
| 6  | 3.857556  | 1.725652  | 3.637419  |
| 1  | 4.900575  | 1.401470  | 3.748607  |
| 1  | 3.645908  | 2.427747  | 4.457099  |
| 1  | 3.217205  | 0.850225  | 3.780165  |
| 6  | 4.818663  | 4.073152  | 2.035771  |
| 1  | 4.703519  | 4.781905  | 1.207973  |
| 1  | 4.674044  | 4.631886  | 2.972034  |
| 1  | 5.853980  | 3.707529  | 2.028756  |
| 6  | -3.550089 | 1.734459  | 0.050399  |
| 14 | -3.112598 | 2.843498  | -1.476224 |
| 6  | -3.460553 | 1.991040  | -3.145471 |
| 1  | -3.183722 | 2.687403  | -3.950310 |
| 1  | -2.893859 | 1.066652  | -3.298736 |
| 1  | -4.525452 | 1.755994  | -3.272172 |
| 6  | -4.106940 | 4.473629  | -1.590593 |
| 1  | -3.958170 | 5.137954  | -0.731918 |
| 1  | -3.789060 | 5.018288  | -2.491487 |
| 1  | -5.183739 | 4.280150  | -1.686562 |
| 6  | -1.266042 | 3.360212  | -1.497560 |
| 1  | -1.069897 | 4.205086  | -0.826432 |
| 1  | -0.586301 | 2.553825  | -1.169807 |
| 1  | -0.971639 | 3.664764  | -2.511506 |
| 14 | -3.749456 | 2.825939  | 1.644196  |
| 6  | -2.400030 | 4.170516  | 1.762135  |
| 1  | -2.516883 | 4.706629  | 2.714723  |
| 1  | -1.387802 | 3.745289  | 1.750148  |
| 1  | -2.461773 | 4.914348  | 0.959145  |
| 6  | -5.457792 | 3.685242  | 1.622589  |
| 1  | -5.500188 | 4.430684  | 2.429931  |
| 1  | -5.669220 | 4.199648  | 0.679593  |
| 1  | -6.266719 | 2.964162  | 1.803574  |
| 6  | -3.709677 | 1.947329  | 3.334883  |
| 1  | -4.508982 | 1.206883  | 3.448315  |
| 1  | -2.753988 | 1.458243  | 3.548905  |
| 1  | -3.865034 | 2.714173  | 4.108373  |
| 6  | -4.842231 | 0.866235  | -0.206877 |
| 1  | -4.888025 | 0.561388  | -1.260883 |
| 1  | -5.750710 | 1.464360  | -0.028429 |
| 6  | -4.940152 | -0.422086 | 0.671115  |
| 1  | -5.919909 | -0.889137 | 0.477181  |

|    |           |           |           |
|----|-----------|-----------|-----------|
| 1  | -4.961005 | -0.110581 | 1.724010  |
| 6  | -3.783082 | -1.471392 | 0.445099  |
| 14 | -4.087927 | -2.520678 | -1.162236 |
| 6  | -2.932923 | -4.035528 | -1.260815 |
| 1  | -1.873836 | -3.744757 | -1.242685 |
| 1  | -3.097172 | -4.757964 | -0.453595 |
| 1  | -3.112802 | -4.556289 | -2.212047 |
| 6  | -5.899061 | -3.127872 | -1.224718 |
| 1  | -6.027044 | -3.791555 | -2.092069 |
| 1  | -6.199941 | -3.683492 | -0.330774 |
| 1  | -6.596250 | -2.288387 | -1.352507 |
| 6  | -3.849568 | -1.639785 | -2.837515 |
| 1  | -4.526406 | -0.789707 | -2.976468 |
| 1  | -2.823781 | -1.286048 | -2.999051 |
| 1  | -4.072514 | -2.368311 | -3.631282 |
| 14 | -3.567147 | -2.630082 | 1.988214  |
| 6  | -4.828478 | -4.067212 | 2.038012  |
| 1  | -4.716977 | -4.776322 | 1.209899  |
| 1  | -4.684688 | -4.626308 | 2.974158  |
| 1  | -5.862560 | -3.697525 | 2.032192  |
| 6  | -1.826932 | -3.399950 | 2.075763  |
| 1  | -1.063622 | -2.636539 | 2.268242  |
| 1  | -1.783369 | -4.123975 | 2.901875  |
| 1  | -1.554899 | -3.929426 | 1.156266  |
| 6  | -3.857018 | -1.723380 | 3.638549  |
| 1  | -4.898972 | -1.395358 | 3.750619  |
| 1  | -3.647011 | -2.426326 | 4.457864  |
| 1  | -3.213326 | -0.850014 | 3.780395  |
| 1  | -0.717654 | 1.365264  | 2.247997  |
| 1  | -1.298627 | -0.169106 | 2.918583  |
| 1  | 1.298882  | 0.168964  | 2.917844  |
| 1  | 0.718134  | -1.365564 | 2.248141  |

-----  
-----
